# Supplementary material for: Retrospective analysis of cervical screening abnormalities in women with type 3 transformation zone without visible lesions
Source: PeerJ. 2025 Nov 27;13:e20396. doi: 10.7717/peerj.20396 (PMC12665263; doi:10.7717/peerj.20396)
Supplement: Supplemental Information 1 [file peerj-13-20396-s001.xlsx]

## Sheet: Sheet1
age(year)	gravidity	parity	menopause	TCT	HPV	ECC+multiple biopsies	biopsies	ECC	histologic diagnosis	histology	HSILs
55	1-3	1-3	Yes	ASCUS	Non-HPV 16/18	ECC+4	LSIL	Negative	CIN1	LSIL	0
72	>3	1-3	Yes	ASC-H/HSIL/AGC	Non-HPV 16/18	ECC+4	HSIL+	Negative	CIN2	HSIL+	1
60	1-3	1-3	Yes	NILM	Non-HPV 16/18	ECC+3	LSIL	Negative	CIN1	LSIL	0
56	>3	1-3	Yes	NILM	Non-HPV 16/18	ECC+4	LSIL	Negative	CIN1	LSIL	0
62	>3	>3	Yes	ASCUS	HPV 16/18	ECC+4	LSIL	Negative	CIN1	LSIL	0
48	>3	1-3	Yes	ASCUS	Non-HPV 16/18	ECC+2	LSIL	Negative	CIN1	LSIL	0
49	1-3	1-3	No	LSIL	Non-HPV 16/18	ECC+4	Negative	Negative	Negative	Negative	0
35	1-3	1-3	No	ASC-H/HSIL/AGC	HPV 16/18	ECC+4	Negative	Negative	Negative	Negative	0
53	>3	1-3	Yes	LSIL	Non-HPV 16/18	ECC+4	LSIL	LSIL	CIN1	LSIL	0
39	>3	1-3	No	ASC-H/HSIL/AGC	HPV 16/18	ECC+4	Negative	Negative	Negative	Negative	0
51	>3	1-3	Yes	ASCUS	Non-HPV 16/18	ECC+4	Negative	Negative	Negative	Negative	0
64	>3	>3	Yes	NILM	Non-HPV 16/18	ECC+2	LSIL	Negative	CIN1	LSIL	0
39	1-3	1-3	No	NILM	HPV 16/18	ECC+4	Negative	Negative	Negative	Negative	0
25	1-3	0	No	ASCUS	HPV 16/18	ECC+4	LSIL	Negative	CIN1	LSIL	0
50	1-3	1-3	No	ASCUS	Non-HPV 16/18	ECC+2	LSIL	Negative	CIN1	LSIL	0
45	>3	1-3	No	NILM	HPV 16/18	ECC+1	Negative	Negative	Negative	Negative	0
46	1-3	1-3	No	NILM	Non-HPV 16/18	ECC+1	LSIL	Negative	CIN1	LSIL	0
33	1-3	1-3	No	ASCUS	Non-HPV 16/18	ECC+4	LSIL	Negative	CIN1	LSIL	0
56	>3	1-3	Yes	ASCUS	Non-HPV 16/18	ECC+2	Negative	LSIL	CIN1	LSIL	0
57	1-3	1-3	Yes	NILM	Non-HPV 16/18	ECC+4	Negative	Negative	Negative	Negative	0
33	1-3	1-3	No	LSIL	Negative	ECC+2	Negative	Negative	Negative	Negative	0
32	1-3	1-3	No	ASCUS	Non-HPV 16/18	ECC+4	Negative	Negative	Negative	Negative	0
52	1-3	1-3	Yes	ASCUS	Non-HPV 16/18	ECC+1	Negative	Negative	Negative	Negative	0
51	1-3	1-3	No	LSIL	Non-HPV 16/18	ECC+4	LSIL	Negative	CIN1	LSIL	0
60	>3	1-3	Yes	NILM	Non-HPV 16/18	ECC+3	HSIL+	HSIL+	CIN3+	HSIL+	1
47	>3	1-3	No	LSIL	Non-HPV 16/18	ECC+1	Negative	LSIL	CIN1	LSIL	0
46	>3	1-3	Yes	ASC-H/HSIL/AGC	HPV 16/18	ECC+3	Negative	LSIL	CIN1	LSIL	0
45	1-3	1-3	Yes	NILM	HPV 16/18	ECC+4	LSIL	Negative	CIN1	LSIL	0
30	1-3	1-3	No	NILM	HPV 16/18	ECC+2	Negative	Negative	Negative	Negative	0
34	>3	1-3	No	ASCUS	Non-HPV 16/18	ECC+2	Negative	Negative	Negative	Negative	0
57	1-3	1-3	Yes	ASCUS	Non-HPV 16/18	ECC+3	Negative	Negative	Negative	Negative	0
32	>3	1-3	No	ASCUS	Non-HPV 16/18	ECC+4	LSIL	Negative	CIN1	LSIL	0
50	1-3	1-3	Yes	NILM	Non-HPV 16/18	ECC+1	Negative	Negative	Negative	Negative	0
39	>3	1-3	No	NILM	HPV 16/18	ECC+2	Negative	Negative	Negative	Negative	0
37	1-3	1-3	No	NILM	Non-HPV 16/18	ECC+4	HSIL+	HSIL+	CIN3+	HSIL+	1
43	>3	1-3	No	ASCUS	Non-HPV 16/18	ECC+4	Negative	Negative	Negative	Negative	0
51	1-3	1-3	No	NILM	HPV 16/18	ECC+3	LSIL	Negative	CIN1	LSIL	0
40	1-3	1-3	No	NILM	Non-HPV 16/18	ECC+1	Negative	Negative	Negative	Negative	0
48	1-3	1-3	Yes	ASCUS	Non-HPV 16/18	ECC+4	Negative	Negative	Negative	Negative	0
54	>3	1-3	Yes	NILM	Non-HPV 16/18	ECC+1	LSIL	Negative	CIN1	LSIL	0
53	>3	1-3	Yes	NILM	HPV 16/18	ECC+2	Negative	Negative	Negative	Negative	0
57	1-3	1-3	Yes	ASCUS	Non-HPV 16/18	ECC+4	LSIL	Negative	CIN1	LSIL	0
57	1-3	1-3	Yes	ASCUS	Non-HPV 16/18	ECC+4	LSIL	Negative	CIN1	LSIL	0
60	>3	1-3	Yes	ASCUS	Non-HPV 16/18	ECC+4	Negative	Negative	Negative	Negative	0
54	1-3	1-3	Yes	ASCUS	HPV 16/18	ECC+4	Negative	Negative	Negative	Negative	0
41	1-3	1-3	Yes	NILM	Non-HPV 16/18	ECC+3	Negative	Negative	Negative	Negative	0
52	1-3	1-3	Yes	NILM	HPV 16/18	ECC+2	Negative	Negative	Negative	Negative	0
56	1-3	1-3	Yes	NILM	HPV 16/18	ECC+4	LSIL	Negative	CIN1	LSIL	0
34	>3	1-3	No	LSIL	Non-HPV 16/18	ECC+4	Negative	Negative	Negative	Negative	0
43	1-3	1-3	No	LSIL	Non-HPV 16/18	ECC+4	Negative	Negative	Negative	Negative	0
65	1-3	1-3	Yes	ASCUS	Non-HPV 16/18	ECC+1	LSIL	Negative	CIN1	LSIL	0
51	>3	1-3	No	ASCUS	Non-HPV 16/18	ECC+1	Negative	Negative	Negative	Negative	0
46	1-3	0	No	ASCUS	Non-HPV 16/18	ECC+1	Negative	Negative	Negative	Negative	0
72	>3	1-3	Yes	ASCUS	Non-HPV 16/18	ECC+4	LSIL	Negative	CIN1	LSIL	0
51	1-3	1-3	Yes	LSIL	Non-HPV 16/18	ECC+4	LSIL	Negative	CIN1	LSIL	0
52	1-3	1-3	No	NILM	Non-HPV 16/18	ECC+2	LSIL	Negative	CIN1	LSIL	0
51	>3	>3	Yes	LSIL	Non-HPV 16/18	ECC+3	LSIL	Negative	CIN1	LSIL	0
63	>3	1-3	Yes	NILM	Non-HPV 16/18	ECC+4	Negative	Negative	Negative	Negative	0
55	>3	1-3	Yes	ASCUS	HPV 16/18	ECC+4	LSIL	Negative	CIN1	LSIL	0
45	>3	1-3	No	LSIL	HPV 16/18	ECC+4	Negative	Negative	Negative	Negative	0
48	1-3	1-3	Yes	ASC-H/HSIL/AGC	Non-HPV 16/18	ECC+3	Negative	Negative	Negative	Negative	0
55	>3	1-3	Yes	LSIL	Non-HPV 16/18	ECC+4	LSIL	Negative	CIN1	LSIL	0
53	1-3	1-3	Yes	NILM	HPV 16/18	ECC+4	Negative	Negative	Negative	Negative	0
54	1-3	1-3	Yes	ASC-H/HSIL/AGC	HPV 16/18	ECC+4	HSIL+	Negative	CIN3+	HSIL+	1
33	1-3	1-3	No	NILM	HPV 16/18	ECC+3	Negative	Negative	Negative	Negative	0
55	>3	1-3	No	NILM	HPV 16/18	ECC+4	Negative	Negative	Negative	Negative	0
56	1-3	1-3	Yes	ASCUS	Non-HPV 16/18	ECC+4	Negative	Negative	Negative	Negative	0
49	>3	1-3	No	ASCUS	Non-HPV 16/18	ECC+3	Negative	Negative	Negative	Negative	0
49	1-3	1-3	No	NILM	Non-HPV 16/18	ECC+2	LSIL	Negative	CIN1	LSIL	0
37	1-3	1-3	No	ASCUS	Non-HPV 16/18	ECC+1	Negative	Negative	Negative	Negative	0
48	1-3	1-3	Yes	NILM	Non-HPV 16/18	ECC+2	Negative	Negative	Negative	Negative	0
51	>3	1-3	No	NILM	Non-HPV 16/18	ECC+1	Negative	Negative	Negative	Negative	0
37	1-3	1-3	No	LSIL	Non-HPV 16/18	ECC+4	LSIL	Negative	CIN1	LSIL	0
39	1-3	1-3	No	ASCUS	Non-HPV 16/18	ECC+3	LSIL	Negative	CIN1	LSIL	0
52	1-3	1-3	Yes	NILM	HPV 16/18	ECC+4	LSIL	Negative	CIN1	LSIL	0
30	1-3	1-3	No	NILM	Non-HPV 16/18	ECC+2	Negative	Negative	Negative	Negative	0
48	>3	1-3	No	ASCUS	Non-HPV 16/18	ECC+1	LSIL	Negative	CIN1	LSIL	0
49	1-3	1-3	No	NILM	Non-HPV 16/18	ECC+2	LSIL	Negative	CIN1	LSIL	0
55	1-3	1-3	Yes	NILM	Non-HPV 16/18	ECC+4	LSIL	Negative	CIN1	LSIL	0
68	1-3	1-3	Yes	ASCUS	Non-HPV 16/18	ECC+4	LSIL	Negative	CIN1	LSIL	0
47	1-3	1-3	Yes	NILM	HPV 16/18	ECC+4	LSIL	Negative	CIN1	LSIL	0
50	1-3	1-3	No	ASCUS	Non-HPV 16/18	ECC+2	Negative	LSIL	CIN1	LSIL	0
29	0	0	No	NILM	HPV 16/18	ECC+1	Negative	Negative	Negative	Negative	0
46	1-3	1-3	No	ASCUS	Non-HPV 16/18	ECC+4	Negative	Negative	Negative	Negative	0
48	1-3	1-3	No	ASCUS	Non-HPV 16/18	ECC+4	LSIL	Negative	CIN1	LSIL	0
30	1-3	1-3	No	NILM	HPV 16/18	ECC+4	LSIL	LSIL	CIN1	LSIL	0
65	1-3	1-3	Yes	NILM	HPV 16/18	ECC+2	Negative	Negative	Negative	Negative	0
51	1-3	1-3	Yes	ASCUS	Non-HPV 16/18	ECC+2	Negative	Negative	Negative	Negative	0
60	1-3	1-3	Yes	NILM	HPV 16/18	ECC+4	LSIL	Negative	CIN1	LSIL	0
66	1-3	1-3	Yes	ASCUS	Non-HPV 16/18	ECC+3	LSIL	Negative	CIN1	LSIL	0
54	1-3	1-3	Yes	ASCUS	Non-HPV 16/18	ECC+4	LSIL	Negative	CIN1	LSIL	0
46	>3	1-3	No	ASCUS	Non-HPV 16/18	ECC+2	LSIL	Negative	CIN1	LSIL	0
58	>3	1-3	Yes	ASCUS	Non-HPV 16/18	ECC+4	LSIL	Negative	CIN1	LSIL	0
42	1-3	1-3	No	NILM	HPV 16/18	ECC+4	LSIL	Negative	CIN1	LSIL	0
62	1-3	1-3	Yes	NILM	HPV 16/18	ECC+4	LSIL	Negative	CIN1	LSIL	0
58	>3	1-3	Yes	ASCUS	Non-HPV 16/18	ECC+4	LSIL	LSIL	CIN1	LSIL	0
46	>3	1-3	No	NILM	HPV 16/18	ECC+4	LSIL	Negative	CIN1	LSIL	0
55	1-3	1-3	Yes	NILM	HPV 16/18	ECC+4	LSIL	Negative	CIN1	LSIL	0
47	1-3	1-3	Yes	NILM	Non-HPV 16/18	ECC+4	LSIL	Negative	CIN1	LSIL	0
50	>3	1-3	No	ASC-H/HSIL/AGC	HPV 16/18	ECC+3	HSIL+	HSIL+	CIN3+	HSIL+	1
50	1-3	1-3	No	LSIL	Non-HPV 16/18	ECC+4	LSIL	Negative	CIN1	LSIL	0
52	1-3	1-3	No	NILM	Non-HPV 16/18	ECC+4	LSIL	Negative	CIN1	LSIL	0
52	1-3	1-3	Yes	NILM	HPV 16/18	ECC+4	LSIL	Negative	CIN1	LSIL	0
50	>3	1-3	Yes	LSIL	Non-HPV 16/18	ECC+2	LSIL	Negative	CIN1	LSIL	0
49	1-3	1-3	Yes	LSIL	Non-HPV 16/18	ECC+3	LSIL	Negative	CIN1	LSIL	0
48	>3	1-3	No	LSIL	Non-HPV 16/18	ECC+4	LSIL	Negative	CIN1	LSIL	0
39	>3	1-3	No	LSIL	Negative	ECC+1	Negative	Negative	Negative	Negative	0
53	1-3	1-3	Yes	ASCUS	Non-HPV 16/18	ECC+2	LSIL	Negative	CIN1	LSIL	0
57	1-3	1-3	No	NILM	Non-HPV 16/18	ECC+1	Negative	Negative	Negative	Negative	0
28	1-3	0	No	LSIL	Non-HPV 16/18	ECC+2	Negative	Negative	Negative	Negative	0
34	1-3	1-3	No	ASC-H/HSIL/AGC	HPV 16/18	ECC+4	LSIL	Negative	CIN1	LSIL	0
29	1-3	1-3	No	NILM	Non-HPV 16/18	ECC+2	Negative	Negative	Negative	Negative	0
56	1-3	1-3	No	ASCUS	Non-HPV 16/18	ECC+3	Negative	Negative	Negative	Negative	0
57	>3	1-3	Yes	ASCUS	Non-HPV 16/18	ECC+3	LSIL	LSIL	CIN1	LSIL	0
49	1-3	1-3	No	ASCUS	Non-HPV 16/18	ECC+2	Negative	Negative	Negative	Negative	0
55	1-3	1-3	Yes	ASCUS	Non-HPV 16/18	ECC+2	LSIL	Negative	CIN1	LSIL	0
34	1-3	1-3	No	ASCUS	Non-HPV 16/18	ECC+3	LSIL	Negative	CIN1	LSIL	0
53	>3	1-3	No	LSIL	Non-HPV 16/18	ECC+3	LSIL	Negative	CIN1	LSIL	0
54	>3	1-3	Yes	NILM	HPV 16/18	ECC+2	Negative	Negative	Negative	Negative	0
45	1-3	1-3	No	ASCUS	Non-HPV 16/18	ECC+3	Negative	Negative	Negative	Negative	0
48	1-3	1-3	No	ASCUS	Non-HPV 16/18	ECC+2	Negative	Negative	Negative	Negative	0
67	1-3	1-3	Yes	ASCUS	HPV 16/18	ECC+4	Negative	Negative	Negative	Negative	0
55	1-3	1-3	Yes	NILM	Non-HPV 16/18	ECC+3	Negative	Negative	Negative	Negative	0
39	>3	1-3	No	NILM	Non-HPV 16/18	ECC+3	LSIL	Negative	CIN1	LSIL	0
56	>3	1-3	Yes	ASCUS	Non-HPV 16/18	ECC+4	Negative	Negative	Negative	Negative	0
39	1-3	1-3	No	LSIL	Non-HPV 16/18	ECC+2	Negative	Negative	Negative	Negative	0
65	1-3	1-3	Yes	LSIL	Non-HPV 16/18	ECC+3	LSIL	Negative	CIN1	LSIL	0
56	1-3	1-3	Yes	ASCUS	Non-HPV 16/18	ECC+4	Negative	Negative	Negative	Negative	0
22	0	0	No	ASCUS	Non-HPV 16/18	ECC+3	Negative	Negative	Negative	Negative	0
41	>3	1-3	No	NILM	Non-HPV 16/18	ECC+1	LSIL	Negative	CIN1	LSIL	0
48	1-3	0	No	ASCUS	Non-HPV 16/18	ECC+4	LSIL	Negative	CIN1	LSIL	0
44	>3	1-3	No	NILM	HPV 16/18	ECC+3	LSIL	LSIL	CIN1	LSIL	0
42	1-3	1-3	No	NILM	Non-HPV 16/18	ECC+3	Negative	Negative	Negative	Negative	0
52	>3	1-3	Yes	ASCUS	Non-HPV 16/18	ECC+4	Negative	Negative	Negative	Negative	0
53	1-3	1-3	Yes	ASCUS	Non-HPV 16/18	ECC+4	LSIL	LSIL	CIN1	LSIL	0
42	1-3	1-3	Yes	ASCUS	Non-HPV 16/18	ECC+4	LSIL	Negative	CIN1	LSIL	0
60	1-3	1-3	Yes	NILM	Non-HPV 16/18	ECC+4	LSIL	Negative	CIN1	LSIL	0
53	>3	1-3	Yes	ASCUS	Non-HPV 16/18	ECC+3	Negative	Negative	Negative	Negative	0
62	1-3	1-3	Yes	ASCUS	Non-HPV 16/18	ECC+4	LSIL	Negative	CIN1	LSIL	0
66	1-3	1-3	Yes	NILM	Non-HPV 16/18	ECC+4	Negative	Negative	Negative	Negative	0
49	>3	1-3	Yes	ASCUS	Non-HPV 16/18	ECC		Negative	Negative	Negative	0
57	1-3	1-3	Yes	NILM	HPV 16/18	ECC+4	LSIL	Negative	CIN1	LSIL	0
33	>3	1-3	No	ASCUS	HPV 16/18	ECC+3	LSIL	Negative	CIN1	LSIL	0
65	>3	1-3	Yes	ASCUS	Non-HPV 16/18	ECC+4	LSIL	Negative	CIN1	LSIL	0
57	>3	1-3	Yes	LSIL	Non-HPV 16/18	ECC+4	Negative	Negative	Negative	Negative	0
52	1-3	1-3	Yes	NILM	Non-HPV 16/18	ECC+1	LSIL	Negative	CIN1	LSIL	0
59	1-3	1-3	Yes	NILM	HPV 16/18	ECC+2	Negative	Negative	Negative	Negative	0
22	1-3	0	No	ASCUS	Negative	ECC+2	LSIL	LSIL	CIN1	LSIL	0
41	1-3	1-3	No	ASCUS	Non-HPV 16/18	ECC		Negative	Negative	Negative	0
44	1-3	1-3	No	ASCUS	Non-HPV 16/18	ECC+1	Negative	LSIL	CIN1	LSIL	0
58	>3	>3	Yes	NILM	HPV 16/18	ECC+2	Negative	Negative	Negative	Negative	0
58	>3	1-3	Yes	ASCUS	Non-HPV 16/18	ECC+1	Negative	Negative	Negative	Negative	0
53	1-3	1-3	Yes	NILM	Non-HPV 16/18	ECC+4	Negative	Negative	Negative	Negative	0
54	1-3	1-3	Yes	ASCUS	Non-HPV 16/18	ECC+4	LSIL	Negative	CIN1	LSIL	0
54	1-3	1-3	Yes	NILM	Non-HPV 16/18	ECC+2	LSIL	Negative	CIN1	LSIL	0
57	1-3	1-3	Yes	NILM	Non-HPV 16/18	ECC+2	Negative	Negative	Negative	Negative	0
57	1-3	1-3	Yes	ASCUS	Non-HPV 16/18	ECC+3	LSIL	LSIL	CIN1	LSIL	0
32	1-3	0	No	ASCUS	HPV 16/18	ECC+2	Negative	Negative	Negative	Negative	0
34	1-3	1-3	No	LSIL	Non-HPV 16/18	ECC+2	Negative	Negative	Negative	Negative	0
59	1-3	1-3	Yes	LSIL	HPV 16/18	ECC+2	LSIL	LSIL	CIN1	LSIL	0
30	1-3	1-3	No	LSIL	Non-HPV 16/18	ECC+2	Negative	LSIL	CIN1	LSIL	0
56	>3	1-3	Yes	ASCUS	HPV 16/18	ECC+1	LSIL	Negative	CIN1	LSIL	0
57	1-3	1-3	Yes	ASCUS	HPV 16/18	ECC+3	LSIL	Negative	CIN1	LSIL	0
58	1-3	1-3	Yes	ASCUS	Non-HPV 16/18	ECC+3	Negative	Negative	Negative	Negative	0
58	>3	1-3	Yes	NILM	Non-HPV 16/18	ECC+2	LSIL	Negative	CIN1	LSIL	0
28	0	0	No	ASCUS	Non-HPV 16/18	ECC+4	LSIL	Negative	CIN1	LSIL	0
39	1-3	1-3	No	ASCUS	Non-HPV 16/18	ECC+2	LSIL	LSIL	CIN1	LSIL	0
58	1-3	1-3	Yes	NILM	Non-HPV 16/18	ECC+2	Negative	Negative	Negative	Negative	0
47	>3	1-3	Yes	ASCUS	Non-HPV 16/18	ECC+1	Negative	Negative	Negative	Negative	0
60	1-3	1-3	Yes	NILM	Non-HPV 16/18	ECC+3	LSIL	Negative	CIN1	LSIL	0
56	1-3	1-3	Yes	ASCUS	Non-HPV 16/18	ECC+3	Negative	Negative	Negative	Negative	0
46	>3	1-3	No	ASCUS	Non-HPV 16/18	ECC+3	LSIL	LSIL	CIN1	LSIL	0
51	1-3	1-3	Yes	ASCUS	Non-HPV 16/18	ECC+2	Negative	Negative	Negative	Negative	0
53	1-3	1-3	Yes	NILM	HPV 16/18	ECC+3	Negative	Negative	Negative	Negative	0
46	1-3	1-3	No	NILM	HPV 16/18	ECC+2	LSIL	Negative	CIN1	LSIL	0
55	1-3	1-3	Yes	ASCUS	Non-HPV 16/18	ECC+3	LSIL	Negative	CIN1	LSIL	0
43	>3	1-3	No	ASCUS	Non-HPV 16/18	ECC+2	LSIL	Negative	CIN1	LSIL	0
36	1-3	1-3	No	ASCUS	Non-HPV 16/18	ECC+2	LSIL	Negative	CIN1	LSIL	0
54	>3	1-3	Yes	NILM	Non-HPV 16/18	ECC+1	LSIL	Negative	CIN1	LSIL	0
69	1-3	1-3	Yes	ASCUS	Non-HPV 16/18	ECC+3	LSIL	Negative	CIN1	LSIL	0
37	1-3	1-3	No	NILM	Non-HPV 16/18	ECC+3	Negative	Negative	Negative	Negative	0
30	>3	1-3	No	ASCUS	Non-HPV 16/18	ECC+3	Negative	Negative	Negative	Negative	0
31	1-3	1-3	No	NILM	Non-HPV 16/18	ECC+2	Negative	Negative	Negative	Negative	0
68	1-3	1-3	Yes	LSIL	Non-HPV 16/18	ECC+3	LSIL	Negative	CIN1	LSIL	0
43	>3	1-3	No	LSIL	Non-HPV 16/18	ECC+3	Negative	Negative	Negative	Negative	0
53	1-3	1-3	Yes	NILM	Non-HPV 16/18	ECC+4	LSIL	Negative	CIN1	LSIL	0
43	1-3	1-3	No	NILM	HPV 16/18	ECC+2	Negative	Negative	Negative	Negative	0
55	1-3	1-3	Yes	NILM	Non-HPV 16/18	ECC+2	Negative	Negative	Negative	Negative	0
49	>3	1-3	Yes	NILM	HPV 16/18	ECC+2	Negative	Negative	Negative	Negative	0
50	>3	1-3	No	LSIL	Non-HPV 16/18	ECC+3	HSIL+	Negative	CIN3+	HSIL+	1
53	1-3	1-3	Yes	ASCUS	Non-HPV 16/18	ECC+4	Negative	Negative	Negative	Negative	0
54	1-3	1-3	No	ASCUS	Non-HPV 16/18	ECC+3	LSIL	Negative	CIN1	LSIL	0
41	>3	1-3	No	ASCUS	Non-HPV 16/18	ECC+4	Negative	Negative	Negative	Negative	0
59	1-3	1-3	Yes	ASCUS	Non-HPV 16/18	ECC+3	Negative	Negative	Negative	Negative	0
34	1-3	1-3	No	ASC-H/HSIL/AGC	HPV 16/18	ECC+4	HSIL+	HSIL+	CIN2	HSIL+	1
41	>3	1-3	No	NILM	Non-HPV 16/18	ECC+4	LSIL	Negative	CIN1	LSIL	0
59	1-3	1-3	Yes	ASCUS	HPV 16/18	ECC+4	LSIL	LSIL	CIN1	LSIL	0
50	1-3	1-3	No	NILM	Non-HPV 16/18	ECC+4	LSIL	Negative	CIN1	LSIL	0
49	1-3	1-3	No	ASCUS	Non-HPV 16/18	ECC+3	Negative	Negative	Negative	Negative	0
47	>3	1-3	No	ASCUS	Non-HPV 16/18	ECC+2	Negative	Negative	Negative	Negative	0
64	1-3	1-3	Yes	NILM	Negative	ECC+2	Negative	Negative	Negative	Negative	0
31	0	0	No	ASCUS	Non-HPV 16/18	ECC+2	Negative	Negative	Negative	Negative	0
52	>3	1-3	Yes	LSIL	Non-HPV 16/18	ECC+2	Negative	Negative	Negative	Negative	0
35	1-3	1-3	No	ASCUS	Non-HPV 16/18	ECC+3	LSIL	Negative	CIN1	LSIL	0
51	1-3	1-3	Yes	ASC-H/HSIL/AGC	Non-HPV 16/18	ECC+4	Negative	Negative	Negative	Negative	0
54	1-3	1-3	Yes	ASC-H/HSIL/AGC	Non-HPV 16/18	ECC+4	Negative	Negative	Negative	Negative	0
50	1-3	1-3	Yes	LSIL	Non-HPV 16/18	ECC+4	LSIL	Negative	CIN1	LSIL	0
54	1-3	1-3	Yes	NILM	Negative	ECC+3	Negative	Negative	Negative	Negative	0
49	>3	1-3	No	ASCUS	Non-HPV 16/18	ECC+4	Negative	Negative	Negative	Negative	0
56	1-3	1-3	Yes	ASCUS	Non-HPV 16/18	ECC+3	LSIL	LSIL	CIN1	LSIL	0
57	1-3	1-3	Yes	NILM	HPV 16/18	ECC+4	Negative	HSIL+	CIN3+	HSIL+	1
53	>3	1-3	No	NILM	HPV 16/18	ECC+4	Negative	Negative	Negative	Negative	0
48	1-3	1-3	Yes	ASCUS	Non-HPV 16/18	ECC+4	HSIL+	Negative	CIN2	HSIL+	1
34	1-3	1-3	No	NILM	Non-HPV 16/18	ECC+4	LSIL	Negative	CIN1	LSIL	0
38	1-3	1-3	No	NILM	HPV 16/18	ECC+1	LSIL	Negative	CIN1	LSIL	0
55	>3	1-3	No	NILM	HPV 16/18	ECC+1	LSIL	Negative	CIN1	LSIL	0
62	1-3	1-3	Yes	ASCUS	Non-HPV 16/18	ECC+3	LSIL	Negative	CIN1	LSIL	0
57	1-3	1-3	Yes	LSIL	Non-HPV 16/18	ECC+3	Negative	Negative	Negative	Negative	0
40	1-3	1-3	No	NILM	Non-HPV 16/18	ECC+1	Negative	Negative	Negative	Negative	0
48	1-3	1-3	Yes	ASCUS	Non-HPV 16/18	ECC+4	LSIL	Negative	CIN1	LSIL	0
50	1-3	1-3	Yes	NILM	Non-HPV 16/18	ECC+2	Negative	Negative	Negative	Negative	0
53	1-3	1-3	Yes	LSIL	Non-HPV 16/18	ECC+3	Negative	Negative	Negative	Negative	0
57	1-3	1-3	Yes	ASCUS	Non-HPV 16/18	ECC+4	Negative	Negative	Negative	Negative	0
58	>3	1-3	Yes	ASCUS	Non-HPV 16/18	ECC+3	Negative	Negative	Negative	Negative	0
61	1-3	1-3	Yes	ASC-H/HSIL/AGC	HPV 16/18	ECC+4	Negative	Negative	Negative	Negative	0
49	1-3	1-3	No	ASCUS	HPV 16/18	ECC+3	LSIL	LSIL	CIN1	LSIL	0
44	>3	1-3	No	ASCUS	Non-HPV 16/18	ECC+4	Negative	Negative	Negative	Negative	0
43	1-3	1-3	No	NILM	HPV 16/18	ECC+2	LSIL	Negative	CIN1	LSIL	0
46	1-3	1-3	No	LSIL	Non-HPV 16/18	ECC+3	Negative	Negative	Negative	Negative	0
45	1-3	1-3	No	LSIL	Non-HPV 16/18	ECC+3	Negative	Negative	Negative	Negative	0
64	1-3	1-3	Yes	NILM	HPV 16/18	ECC+4	Negative	Negative	Negative	Negative	0
43	1-3	1-3	No	ASCUS	HPV 16/18	ECC+4	Negative	Negative	Negative	Negative	0
39	1-3	1-3	No	ASCUS	Non-HPV 16/18	ECC+2	LSIL	Negative	CIN1	LSIL	0
49	1-3	1-3	No	NILM	Non-HPV 16/18	ECC+4	Negative	Negative	Negative	Negative	0
44	1-3	1-3	No	NILM	HPV 16/18	ECC+4	LSIL	Negative	CIN1	LSIL	0
61	>3	1-3	Yes	ASCUS	Non-HPV 16/18	ECC+2	LSIL	Negative	CIN1	LSIL	0
48	1-3	1-3	No	NILM	Non-HPV 16/18	ECC+3	LSIL	Negative	CIN1	LSIL	0
30	0	0	No	NILM	HPV 16/18	ECC		Negative	Negative	Negative	0
23	1-3	0	No	ASCUS	Non-HPV 16/18	ECC+1	Negative	Negative	Negative	Negative	0
30	0	0	No	NILM	HPV 16/18	ECC		Negative	Negative	Negative	0
59	1-3	1-3	Yes	NILM	Non-HPV 16/18	ECC+3	LSIL	Negative	CIN1	LSIL	0
21	0	0	No	LSIL	HPV 16/18	ECC+4	Negative	Negative	Negative	Negative	0
41	>3	1-3	No	LSIL	Non-HPV 16/18	ECC+3	Negative	Negative	Negative	Negative	0
23	0	0	No	NILM	Non-HPV 16/18	ECC+4	LSIL	Negative	CIN1	LSIL	0
58	1-3	1-3	Yes	ASCUS	Non-HPV 16/18	ECC+4	Negative	Negative	Negative	Negative	0
50	>3	1-3	No	NILM	Non-HPV 16/18	ECC+1	Negative	Negative	Negative	Negative	0
57	1-3	1-3	Yes	ASCUS	Non-HPV 16/18	ECC+3	Negative	Negative	Negative	Negative	0
33	1-3	1-3	No	ASCUS	Non-HPV 16/18	ECC+3	Negative	Negative	Negative	Negative	0
63	>3	1-3	Yes	ASC-H/HSIL/AGC	Non-HPV 16/18	ECC+3	HSIL+	Negative	CIN2	HSIL+	1
45	1-3	1-3	Yes	NILM	Non-HPV 16/18	ECC+2	LSIL	LSIL	CIN1	LSIL	0
44	>3	1-3	No	LSIL	Negative	ECC+2	Negative	Negative	Negative	Negative	0
53	1-3	1-3	Yes	ASCUS	HPV 16/18	ECC+3	Negative	Negative	Negative	Negative	0
37	1-3	1-3	No	ASCUS	Non-HPV 16/18	ECC+4	LSIL	Negative	CIN1	LSIL	0
52	>3	1-3	Yes	LSIL	Negative	ECC+3	Negative	Negative	Negative	Negative	0
55	>3	>3	No	LSIL	Non-HPV 16/18	ECC+4	Negative	Negative	Negative	Negative	0
35	>3	1-3	No	ASCUS	Non-HPV 16/18	ECC+4	LSIL	Negative	CIN1	LSIL	0
33	>3	1-3	No	NILM	Non-HPV 16/18	ECC+2	LSIL	Negative	CIN1	LSIL	0
51	1-3	1-3	No	LSIL	HPV 16/18	ECC+4	LSIL	Negative	CIN1	LSIL	0
37	1-3	1-3	No	ASCUS	Non-HPV 16/18	ECC+4	LSIL	Negative	CIN1	LSIL	0
52	>3	1-3	Yes	LSIL	Negative	ECC+3	Negative	Negative	Negative	Negative	0
55	>3	>3	No	LSIL	Non-HPV 16/18	ECC+4	Negative	Negative	Negative	Negative	0
35	>3	1-3	No	ASCUS	Non-HPV 16/18	ECC+4	LSIL	Negative	CIN1	LSIL	0
33	>3	1-3	No	NILM	Non-HPV 16/18	ECC+2	LSIL	Negative	CIN1	LSIL	0
51	1-3	1-3	No	LSIL	HPV 16/18	ECC+4	LSIL	Negative	CIN1	LSIL	0
56	1-3	1-3	Yes	ASC-H/HSIL/AGC	Non-HPV 16/18	ECC+4	Negative	Negative	Negative	Negative	0
35	1-3	0	No	ASCUS	Non-HPV 16/18	ECC+3	Negative	Negative	Negative	Negative	0
39	1-3	1-3	No	NILM	HPV 16/18	ECC+2	Negative	Negative	Negative	Negative	0
59	1-3	1-3	Yes	NILM	Non-HPV 16/18	ECC+2	Negative	Negative	Negative	Negative	0
56	>3	1-3	Yes	NILM	Non-HPV 16/18	ECC+1	LSIL	Negative	CIN1	LSIL	0
57	1-3	1-3	Yes	NILM	Non-HPV 16/18	ECC+2	LSIL	Negative	CIN1	LSIL	0
53	>3	1-3	Yes	ASCUS	Non-HPV 16/18	ECC+4	Negative	Negative	Negative	Negative	0
57	1-3	1-3	Yes	ASC-H/HSIL/AGC	Non-HPV 16/18	ECC+4	LSIL	Negative	CIN1	LSIL	0
52	1-3	1-3	No	NILM	Non-HPV 16/18	ECC+4	Negative	Negative	Negative	Negative	0
36	1-3	1-3	No	ASCUS	Non-HPV 16/18	ECC+1	LSIL	Negative	CIN1	LSIL	0
50	>3	1-3	Yes	NILM	Non-HPV 16/18	ECC		Negative	Negative	Negative	0
64	>3	1-3	Yes	ASCUS	HPV 16/18	ECC+3	Negative	Negative	Negative	Negative	0
54	1-3	1-3	Yes	ASCUS	Non-HPV 16/18	ECC+4	Negative	Negative	Negative	Negative	0
34	1-3	1-3	No	LSIL	Negative	ECC+3	Negative	Negative	Negative	Negative	0
61	1-3	1-3	Yes	NILM	HPV 16/18	ECC+3	LSIL	Negative	CIN1	LSIL	0
59	1-3	1-3	Yes	NILM	Non-HPV 16/18	ECC+3	LSIL	Negative	CIN1	LSIL	0
52	>3	1-3	Yes	ASC-H/HSIL/AGC	Non-HPV 16/18	ECC+4	HSIL+	HSIL+	CIN3+	HSIL+	1
50	>3	1-3	Yes	ASCUS	Non-HPV 16/18	ECC+3	LSIL	Negative	CIN1	LSIL	0
59	>3	1-3	Yes	ASC-H/HSIL/AGC	Non-HPV 16/18	ECC+3	HSIL+	HSIL+	CIN3+	HSIL+	1
58	1-3	1-3	Yes	LSIL	Non-HPV 16/18	ECC+1	Negative	Negative	Negative	Negative	0
55	1-3	1-3	Yes	ASCUS	Non-HPV 16/18	ECC+4	LSIL	Negative	CIN1	LSIL	0
43	1-3	1-3	No	ASCUS	Non-HPV 16/18	ECC+3	LSIL	Negative	CIN1	LSIL	0
58	1-3	1-3	Yes	ASCUS	Non-HPV 16/18	ECC+2	Negative	Negative	Negative	Negative	0
38	1-3	1-3	No	ASCUS	Non-HPV 16/18	ECC	Negative	Negative	Negative	Negative	0
70	1-3	1-3	Yes	ASCUS	Non-HPV 16/18	ECC+2	Negative	Negative	Negative	Negative	0
53	>3	1-3	Yes	ASCUS	Non-HPV 16/18	ECC+4	HSIL+	Negative	CIN2	HSIL+	1
38	>3	1-3	No	ASCUS	HPV 16/18	ECC+4	LSIL	Negative	CIN1	LSIL	0
57	1-3	1-3	Yes	ASC-H/HSIL/AGC	Non-HPV 16/18	ECC+4	Negative	Negative	Negative	Negative	0
45	1-3	1-3	No	ASCUS	Non-HPV 16/18	ECC+4	LSIL	Negative	CIN1	LSIL	0
32	>3	1-3	No	ASC-H/HSIL/AGC	HPV 16/18	ECC+2	Negative	Negative	Negative	Negative	0
68	0	0	Yes	NILM	HPV 16/18	ECC+2	Negative	Negative	Negative	Negative	0
65	1-3	1-3	Yes	NILM	HPV 16/18	ECC+2	Negative	Negative	Negative	Negative	0
33	>3	1-3	No	LSIL	Non-HPV 16/18	ECC		Negative	Negative	Negative	0
67	1-3	1-3	Yes	ASCUS	Non-HPV 16/18	ECC+4	HSIL+	Negative	CIN2	HSIL+	1
51	1-3	1-3	No	ASCUS	HPV 16/18	ECC+4	HSIL+	Negative	CIN2	HSIL+	1
47	>3	1-3	Yes	ASCUS	Non-HPV 16/18	ECC		Negative	Negative	Negative	0
58	1-3	1-3	Yes	NILM	HPV 16/18	ECC+4	LSIL	LSIL	CIN1	LSIL	0
43	1-3	1-3	No	LSIL	HPV 16/18	ECC+4	LSIL	Negative	CIN1	LSIL	0
55	1-3	1-3	Yes	ASCUS	Negative	ECC+2	Negative	Negative	Negative	Negative	0
34	1-3	1-3	No	NILM	HPV 16/18	ECC+3	Negative	Negative	Negative	Negative	0
58	1-3	1-3	Yes	ASCUS	Non-HPV 16/18	ECC+2	Negative	Negative	Negative	Negative	0
46	1-3	1-3	No	ASCUS	Non-HPV 16/18	ECC+1	Negative	Negative	Negative	Negative	0
35	1-3	1-3	No	NILM	Negative	ECC+3	Negative	Negative	Negative	Negative	0
47	1-3	1-3	No	NILM	Non-HPV 16/18	ECC+2	LSIL	Negative	CIN1	LSIL	0
37	1-3	1-3	No	NILM	HPV 16/18	ECC+2	Negative	Negative	Negative	Negative	0
55	1-3	1-3	Yes	NILM	Non-HPV 16/18	ECC+2	Negative	Negative	Negative	Negative	0
56	1-3	1-3	Yes	LSIL	Non-HPV 16/18	ECC+4	LSIL	Negative	CIN1	LSIL	0
59	1-3	1-3	Yes	LSIL	HPV 16/18	ECC+1	LSIL	Negative	CIN1	LSIL	0
24	0	0	No	NILM	HPV 16/18	ECC+4	Negative	Negative	Negative	Negative	0
51	>3	1-3	Yes	ASCUS	Non-HPV 16/18	ECC+2	LSIL	Negative	CIN1	LSIL	0
61	>3	1-3	Yes	ASC-H/HSIL/AGC	Non-HPV 16/18	ECC+4	Negative	Negative	Negative	Negative	0
54	>3	1-3	Yes	ASCUS	HPV 16/18	ECC+4	Negative	Negative	Negative	Negative	0
58	1-3	1-3	Yes	ASCUS	Negative	ECC+4	Negative	Negative	Negative	Negative	0
58	1-3	1-3	Yes	NILM	HPV 16/18	ECC+4	LSIL	Negative	CIN1	LSIL	0
35	1-3	1-3	No	NILM	Non-HPV 16/18	ECC+1	LSIL	Negative	CIN1	LSIL	0
38	>3	1-3	No	ASCUS	Non-HPV 16/18	ECC+4	LSIL	Negative	CIN1	LSIL	0
59	1-3	1-3	Yes	NILM	Non-HPV 16/18	ECC+4	LSIL	Negative	CIN1	LSIL	0
42	>3	1-3	No	ASCUS	Non-HPV 16/18	ECC+2	Negative	Negative	Negative	Negative	0
39	>3	1-3	No	ASCUS	Non-HPV 16/18	ECC+2	Negative	Negative	Negative	Negative	0
50	1-3	1-3	Yes	ASCUS	Non-HPV 16/18	ECC+2	Negative	Negative	Negative	Negative	0
56	1-3	1-3	Yes	ASCUS	Non-HPV 16/18	ECC+4	Negative	Negative	Negative	Negative	0
54	1-3	1-3	Yes	ASCUS	Non-HPV 16/18	ECC+4	LSIL	Negative	CIN1	LSIL	0
50	1-3	1-3	No	LSIL	Negative	ECC+4	Negative	Negative	Negative	Negative	0
28	1-3	0	No	NILM	HPV 16/18	ECC+3	LSIL	Negative	CIN1	LSIL	0
43	>3	1-3	No	LSIL	Non-HPV 16/18	ECC+3	Negative	Negative	Negative	Negative	0
39	1-3	1-3	No	ASCUS	Non-HPV 16/18	ECC+1	Negative	Negative	Negative	Negative	0
53	>3	1-3	Yes	ASCUS	Non-HPV 16/18	ECC+1	LSIL	Negative	CIN1	LSIL	0
58	>3	1-3	Yes	NILM	HPV 16/18	ECC+3	LSIL	Negative	CIN1	LSIL	0
21	0	0	No	LSIL	HPV 16/18	ECC+3	LSIL	Negative	CIN1	LSIL	0
49	>3	1-3	No	ASCUS	Non-HPV 16/18	ECC+4	Negative	Negative	Negative	Negative	0
58	1-3	1-3	Yes	LSIL	Non-HPV 16/18	ECC+4	Negative	Negative	Negative	Negative	0
56	1-3	1-3	Yes	NILM	Non-HPV 16/18	ECC+2	Negative	Negative	Negative	Negative	0
58	0	0	Yes	ASCUS	HPV 16/18	ECC+3	LSIL	Negative	CIN1	LSIL	0
25	0	0	No	ASCUS	Non-HPV 16/18	ECC+2	Negative	Negative	Negative	Negative	0
59	>3	1-3	Yes	ASCUS	Non-HPV 16/18	ECC+2	Negative	Negative	Negative	Negative	0
48	1-3	1-3	Yes	ASCUS	Non-HPV 16/18	ECC+1	LSIL	Negative	CIN1	LSIL	0
63	>3	1-3	Yes	NILM	Non-HPV 16/18	ECC+1	Negative	Negative	Negative	Negative	0
33	>3	1-3	No	ASCUS	Non-HPV 16/18	ECC+4	Negative	Negative	Negative	Negative	0
57	>3	1-3	Yes	ASCUS	HPV 16/18	ECC+4	Negative	Negative	Negative	Negative	0
53	1-3	1-3	Yes	NILM	Non-HPV 16/18	ECC+2	Negative	Negative	Negative	Negative	0
66	1-3	1-3	Yes	NILM	Non-HPV 16/18	ECC+3	Negative	Negative	Negative	Negative	0
54	1-3	1-3	Yes	ASC-H/HSIL/AGC	Non-HPV 16/18	ECC+3	Negative	Negative	Negative	Negative	0
31	0	0	No	NILM	HPV 16/18	ECC+3	Negative	Negative	Negative	Negative	0
58	1-3	1-3	Yes	NILM	Non-HPV 16/18	ECC+3	Negative	Negative	Negative	Negative	0
53	>3	1-3	No	NILM	HPV 16/18	ECC+2	Negative	Negative	Negative	Negative	0
41	>3	1-3	No	NILM	HPV 16/18	ECC+2	Negative	Negative	Negative	Negative	0
64	>3	1-3	Yes	ASCUS	Non-HPV 16/18	ECC+2	LSIL	Negative	CIN1	LSIL	0
55	1-3	1-3	Yes	ASCUS	Non-HPV 16/18	ECC+4	Negative	Negative	Negative	Negative	0
54	>3	0	Yes	ASCUS	Non-HPV 16/18	ECC+4	LSIL	Negative	CIN1	LSIL	0
49	>3	1-3	Yes	NILM	Non-HPV 16/18	ECC+2	LSIL	Negative	CIN1	LSIL	0
26	1-3	1-3	No	NILM	HPV 16/18	ECC+4	Negative	Negative	Negative	Negative	0
50	>3	1-3	No	LSIL	Non-HPV 16/18	ECC+4	LSIL	Negative	CIN1	LSIL	0
54	1-3	1-3	Yes	NILM	Non-HPV 16/18	ECC+2	Negative	Negative	Negative	Negative	0
67	1-3	1-3	Yes	NILM	Negative	ECC+2	Negative	Negative	Negative	Negative	0
53	1-3	1-3	Yes	NILM	HPV 16/18	ECC+2	Negative	Negative	Negative	Negative	0
53	>3	1-3	Yes	NILM	Non-HPV 16/18	ECC+4	Negative	Negative	Negative	Negative	0
34	1-3	1-3	No	LSIL	Negative	ECC+4	Negative	Negative	Negative	Negative	0
52	1-3	1-3	Yes	LSIL	Negative	ECC+2	HSIL+	Negative	CIN2	HSIL+	1
69	1-3	1-3	Yes	NILM	HPV 16/18	ECC+4	Negative	Negative	Negative	Negative	0
43	1-3	1-3	No	ASCUS	Negative	ECC+2	Negative	Negative	Negative	Negative	0
58	1-3	1-3	Yes	ASCUS	Non-HPV 16/18	ECC+1	Negative	Negative	Negative	Negative	0
46	1-3	1-3	No	ASCUS	Non-HPV 16/18	ECC+2	Negative	HSIL+	CIN2	HSIL+	1
53	1-3	1-3	Yes	ASC-H/HSIL/AGC	Non-HPV 16/18	ECC+4	Negative	Negative	Negative	Negative	0
43	1-3	1-3	No	LSIL	Non-HPV 16/18	ECC+3	LSIL	LSIL	CIN1	LSIL	0
55	1-3	1-3	Yes	ASC-H/HSIL/AGC	Non-HPV 16/18	ECC+4	Negative	LSIL	CIN1	LSIL	0
45	1-3	1-3	No	ASCUS	Non-HPV 16/18	ECC+2	Negative	Negative	Negative	Negative	0
34	1-3	1-3	No	NILM	Non-HPV 16/18	ECC+1	Negative	Negative	Negative	Negative	0
56	>3	1-3	Yes	NILM	Non-HPV 16/18	ECC+3	LSIL	Negative	CIN1	LSIL	0
52	>3	1-3	Yes	ASCUS	Non-HPV 16/18	ECC+1	LSIL	Negative	CIN1	LSIL	0
55	>3	1-3	Yes	NILM	Non-HPV 16/18	ECC+4	Negative	Negative	Negative	Negative	0
58	1-3	1-3	Yes	NILM	Non-HPV 16/18	ECC+2	Negative	Negative	Negative	Negative	0
42	1-3	1-3	No	NILM	Non-HPV 16/18	ECC+1	Negative	Negative	Negative	Negative	0
61	>3	1-3	Yes	NILM	Non-HPV 16/18	ECC+4	Negative	Negative	Negative	Negative	0
60	1-3	1-3	Yes	ASCUS	HPV 16/18	ECC+2	Negative	Negative	Negative	Negative	0
64	1-3	1-3	Yes	NILM	Non-HPV 16/18	ECC+2	Negative	Negative	Negative	Negative	0
57	1-3	1-3	Yes	NILM	Non-HPV 16/18	ECC+4	LSIL	Negative	CIN1	LSIL	0
53	>3	1-3	Yes	ASCUS	Non-HPV 16/18	ECC+3	Negative	Negative	Negative	Negative	0
54	>3	1-3	Yes	NILM	Non-HPV 16/18	ECC+2	Negative	Negative	Negative	Negative	0
64	1-3	1-3	Yes	ASCUS	HPV 16/18	ECC		Negative	Negative	Negative	0
38	1-3	1-3	No	ASCUS	HPV 16/18	ECC+2	LSIL	Negative	CIN1	LSIL	0
54	1-3	1-3	Yes	ASCUS	Non-HPV 16/18	ECC+4	Negative	LSIL	CIN1	LSIL	0
33	1-3	0	No	NILM	HPV 16/18	ECC+3	Negative	Negative	Negative	Negative	0
56	1-3	1-3	Yes	NILM	HPV 16/18	ECC+4	LSIL	Negative	CIN1	LSIL	0
53	1-3	1-3	No	LSIL	Non-HPV 16/18	ECC+4	Negative	Negative	Negative	Negative	0
34	1-3	0	No	ASCUS	Non-HPV 16/18	ECC+2	Negative	Negative	Negative	Negative	0
33	0	0	No	NILM	Non-HPV 16/18	ECC+2	Negative	Negative	Negative	Negative	0
55	1-3	1-3	Yes	ASCUS	HPV 16/18	ECC+1	Negative	Negative	Negative	Negative	0
43	>3	1-3	No	ASCUS	Non-HPV 16/18	ECC+4	Negative	Negative	Negative	Negative	0
31	>3	1-3	No	NILM	Non-HPV 16/18	ECC+2	Negative	Negative	Negative	Negative	0
64	1-3	1-3	Yes	NILM	Non-HPV 16/18	ECC+3	Negative	Negative	Negative	Negative	0
59	1-3	1-3	Yes	ASCUS	Non-HPV 16/18	ECC+1	Negative	Negative	Negative	Negative	0
54	1-3	1-3	Yes	NILM	Non-HPV 16/18	ECC+2	Negative	Negative	Negative	Negative	0
30	>3	1-3	No	ASCUS	Non-HPV 16/18	ECC+3	Negative	Negative	Negative	Negative	0
28	0	0	No	NILM	Non-HPV 16/18	ECC+2	Negative	Negative	Negative	Negative	0
37	>3	1-3	No	ASCUS	Negative	ECC+2	Negative	Negative	Negative	Negative	0
39	>3	1-3	No	ASCUS	Negative	ECC+3	Negative	Negative	Negative	Negative	0
48	>3	1-3	No	ASC-H/HSIL/AGC	HPV 16/18	ECC+4	Negative	HSIL+	CIN2	HSIL+	1
56	1-3	1-3	Yes	NILM	Non-HPV 16/18	ECC+4	Negative	Negative	Negative	Negative	0
61	1-3	1-3	Yes	NILM	Non-HPV 16/18	ECC+4	Negative	Negative	Negative	Negative	0
33	>3	1-3	No	NILM	Non-HPV 16/18	ECC+3	Negative	Negative	Negative	Negative	0
54	1-3	1-3	Yes	LSIL	Non-HPV 16/18	ECC+4	Negative	Negative	Negative	Negative	0
47	1-3	1-3	No	ASCUS	Non-HPV 16/18	ECC+4	Negative	Negative	Negative	Negative	0
61	1-3	1-3	Yes	NILM	Non-HPV 16/18	ECC+4	Negative	Negative	Negative	Negative	0
33	>3	1-3	No	NILM	Non-HPV 16/18	ECC+3	Negative	Negative	Negative	Negative	0
54	1-3	1-3	Yes	LSIL	Non-HPV 16/18	ECC+4	Negative	Negative	Negative	Negative	0
47	1-3	1-3	No	ASCUS	Non-HPV 16/18	ECC+4	Negative	Negative	Negative	Negative	0
55	>3	1-3	Yes	ASCUS	Non-HPV 16/18	ECC+4	Negative	Negative	Negative	Negative	0
56	1-3	1-3	Yes	NILM	Non-HPV 16/18	ECC+4	Negative	Negative	Negative	Negative	0
23	1-3	0	No	NILM	Non-HPV 16/18	ECC+2	LSIL	Negative	CIN1	LSIL	0
33	1-3	0	No	NILM	Non-HPV 16/18	ECC+1	Negative	Negative	Negative	Negative	0
53	>3	1-3	Yes	NILM	Non-HPV 16/18	ECC+4	Negative	Negative	Negative	Negative	0
54	1-3	1-3	Yes	ASCUS	Non-HPV 16/18	ECC+4	Negative	Negative	Negative	Negative	0
39	1-3	1-3	No	ASCUS	Non-HPV 16/18	ECC+4	LSIL	Negative	CIN1	LSIL	0
55	1-3	1-3	Yes	LSIL	Non-HPV 16/18	ECC+4	Negative	Negative	Negative	Negative	0
38	1-3	1-3	No	NILM	Non-HPV 16/18	ECC+1	Negative	Negative	Negative	Negative	0
48	>3	1-3	Yes	NILM	HPV 16/18	ECC+4	Negative	Negative	Negative	Negative	0
59	1-3	1-3	Yes	NILM	Non-HPV 16/18	ECC+3	Negative	Negative	Negative	Negative	0
48	>3	1-3	No	NILM	HPV 16/18	ECC+4	Negative	Negative	Negative	Negative	0
58	1-3	1-3	Yes	NILM	HPV 16/18	ECC+4	Negative	Negative	Negative	Negative	0
40	1-3	1-3	No	NILM	HPV 16/18	ECC+4	Negative	Negative	Negative	Negative	0
70	1-3	1-3	Yes	ASCUS	Non-HPV 16/18	ECC+4	Negative	Negative	Negative	Negative	0
55	>3	1-3	Yes	ASCUS	Non-HPV 16/18	ECC+4	LSIL	Negative	CIN1	LSIL	0
42	>3	1-3	No	NILM	Non-HPV 16/18	ECC+2	Negative	Negative	Negative	Negative	0
32	1-3	1-3	No	NILM	HPV 16/18	ECC+4	Negative	Negative	Negative	Negative	0
55	>3	1-3	Yes	ASCUS	Non-HPV 16/18	ECC+4	Negative	Negative	Negative	Negative	0
56	>3	1-3	Yes	ASCUS	Non-HPV 16/18	ECC+4	LSIL	Negative	CIN1	LSIL	0
53	>3	>3	Yes	NILM	Non-HPV 16/18	ECC+4	Negative	Negative	Negative	Negative	0
50	1-3	1-3	Yes	LSIL	Non-HPV 16/18	ECC+4	Negative	Negative	Negative	Negative	0
50	1-3	1-3	No	ASCUS	Non-HPV 16/18	ECC+4	Negative	Negative	Negative	Negative	0
48	1-3	1-3	Yes	NILM	Non-HPV 16/18	ECC+4	Negative	Negative	Negative	Negative	0
35	1-3	1-3	No	ASCUS	Non-HPV 16/18	ECC+4	Negative	Negative	Negative	Negative	0
53	>3	1-3	Yes	NILM	HPV 16/18	ECC+4	Negative	Negative	Negative	Negative	0
36	1-3	1-3	No	LSIL	Non-HPV 16/18	ECC+4	LSIL	Negative	CIN1	LSIL	0
52	>3	1-3	Yes	NILM	HPV 16/18	ECC+4	Negative	Negative	Negative	Negative	0
34	1-3	1-3	No	ASCUS	Non-HPV 16/18	ECC+4	Negative	Negative	Negative	Negative	0
46	1-3	1-3	No	LSIL	Non-HPV 16/18	ECC+4	Negative	Negative	Negative	Negative	0
55	1-3	1-3	Yes	NILM	Non-HPV 16/18	ECC+4	Negative	Negative	Negative	Negative	0
34	>3	1-3	No	NILM	HPV 16/18	ECC+4	LSIL	Negative	CIN1	LSIL	0
44	1-3	1-3	No	LSIL	Non-HPV 16/18	ECC+4	Negative	Negative	Negative	Negative	0
51	1-3	1-3	Yes	NILM	Non-HPV 16/18	ECC+4	Negative	Negative	Negative	Negative	0
55	1-3	1-3	Yes	NILM	Non-HPV 16/18	ECC+4	Negative	Negative	Negative	Negative	0
28	0	0	No	ASCUS	Non-HPV 16/18	ECC+4	Negative	Negative	Negative	Negative	0
28	1-3	1-3	No	LSIL	Non-HPV 16/18	ECC+4	Negative	Negative	Negative	Negative	0
46	1-3	1-3	No	NILM	HPV 16/18	ECC+3	Negative	Negative	Negative	Negative	0
50	>3	1-3	Yes	ASCUS	Non-HPV 16/18	ECC+4	Negative	Negative	Negative	Negative	0
56	0	0	Yes	NILM	Non-HPV 16/18	ECC+4	Negative	Negative	Negative	Negative	0
44	1-3	1-3	No	ASCUS	Non-HPV 16/18	ECC+4	LSIL	Negative	CIN1	LSIL	0
38	1-3	1-3	No	NILM	Non-HPV 16/18	ECC+4	Negative	Negative	Negative	Negative	0
36	>3	1-3	No	NILM	Non-HPV 16/18	ECC+4	Negative	Negative	Negative	Negative	0
31	1-3	1-3	No	ASCUS	Non-HPV 16/18	ECC+4	Negative	Negative	Negative	Negative	0
53	>3	1-3	No	NILM	Non-HPV 16/18	ECC+4	Negative	Negative	Negative	Negative	0
46	>3	1-3	No	ASCUS	Non-HPV 16/18	ECC+3	Negative	Negative	Negative	Negative	0
33	1-3	1-3	No	NILM	Non-HPV 16/18	ECC+4	Negative	Negative	Negative	Negative	0
38	>3	1-3	No	NILM	Non-HPV 16/18	ECC	Negative	Negative	Negative	Negative	0
46	>3	1-3	No	NILM	Non-HPV 16/18	ECC+4	Negative	Negative	Negative	Negative	0
44	1-3	1-3	No	ASCUS	Non-HPV 16/18	ECC+4	Negative	Negative	Negative	Negative	0
57	1-3	1-3	Yes	LSIL	Non-HPV 16/18	ECC+4	LSIL	Negative	CIN1	LSIL	0
44	1-3	1-3	No	NILM	Non-HPV 16/18	ECC+4	Negative	Negative	Negative	Negative	0
40	1-3	1-3	No	LSIL	Non-HPV 16/18	ECC+4	LSIL	Negative	CIN1	LSIL	0
50	>3	1-3	Yes	NILM	Non-HPV 16/18	ECC+4	Negative	Negative	Negative	Negative	0
80	>3	1-3	Yes	NILM	Non-HPV 16/18	ECC+2	Negative	Negative	Negative	Negative	0
31	1-3	1-3	No	NILM	Non-HPV 16/18	ECC+4	Negative	Negative	Negative	Negative	0
44	>3	1-3	Yes	NILM	Non-HPV 16/18	ECC+2	Negative	Negative	Negative	Negative	0
58	>3	1-3	Yes	ASCUS	Non-HPV 16/18	ECC+4	Negative	Negative	Negative	Negative	0
30	1-3	1-3	No	LSIL	Non-HPV 16/18	ECC+2	LSIL	Negative	CIN1	LSIL	0
42	1-3	1-3	No	NILM	Non-HPV 16/18	ECC	Negative	Negative	Negative	Negative	0
63	1-3	1-3	Yes	ASCUS	Non-HPV 16/18	ECC+4	Negative	Negative	Negative	Negative	0
56	>3	1-3	Yes	NILM	Non-HPV 16/18	ECC+4	LSIL	Negative	CIN1	LSIL	0
55	>3	1-3	Yes	NILM	Non-HPV 16/18	ECC+4	Negative	Negative	Negative	Negative	0
59	1-3	1-3	Yes	NILM	Non-HPV 16/18	ECC+4	LSIL	Negative	CIN1	LSIL	0
50	1-3	1-3	Yes	ASCUS	Non-HPV 16/18	ECC+4	Negative	Negative	Negative	Negative	0
61	1-3	1-3	Yes	ASCUS	Negative	ECC+4	Negative	Negative	Negative	Negative	0
51	1-3	1-3	No	NILM	Non-HPV 16/18	ECC+4	Negative	Negative	Negative	Negative	0
59	1-3	1-3	Yes	ASCUS	Non-HPV 16/18	ECC+4	Negative	Negative	Negative	Negative	0
54	1-3	1-3	Yes	ASCUS	Non-HPV 16/18	ECC+4	Negative	Negative	Negative	Negative	0
36	1-3	1-3	No	NILM	Non-HPV 16/18	ECC+2	Negative	HSIL+	CIN3+	HSIL+	1
66	1-3	1-3	Yes	NILM	Non-HPV 16/18	ECC	Negative	Negative	Negative	Negative	0
57	1-3	1-3	Yes	NILM	Non-HPV 16/18	ECC+4	Negative	Negative	Negative	Negative	0
59	>3	1-3	Yes	ASCUS	Non-HPV 16/18	ECC+4	Negative	Negative	Negative	Negative	0
30	>3	1-3	No	NILM	HPV 16/18	ECC+4	LSIL	Negative	CIN1	LSIL	0
60	1-3	1-3	Yes	NILM	Non-HPV 16/18	ECC+4	Negative	Negative	Negative	Negative	0
47	>3	1-3	No	NILM	HPV 16/18	ECC+3	Negative	Negative	Negative	Negative	0
36	>3	1-3	No	NILM	Non-HPV 16/18	ECC+3	Negative	Negative	Negative	Negative	0
58	1-3	1-3	Yes	ASC-H/HSIL/AGC	Non-HPV 16/18	ECC+4	Negative	Negative	Negative	Negative	0
49	1-3	1-3	Yes	NILM	HPV 16/18	ECC+4	Negative	Negative	Negative	Negative	0
44	1-3	1-3	No	NILM	Non-HPV 16/18	ECC+3	Negative	Negative	Negative	Negative	0
52	1-3	1-3	Yes	ASCUS	Non-HPV 16/18	ECC+4	Negative	Negative	Negative	Negative	0
36	1-3	0	No	NILM	HPV 16/18	ECC+4	Negative	Negative	Negative	Negative	0
56	1-3	1-3	Yes	ASCUS	Non-HPV 16/18	ECC+4	Negative	Negative	Negative	Negative	0
45	1-3	1-3	No	ASCUS	Non-HPV 16/18	ECC+4	Negative	Negative	Negative	Negative	0
40	1-3	1-3	No	NILM	Negative	ECC+3	Negative	Negative	Negative	Negative	0
56	1-3	1-3	Yes	NILM	Non-HPV 16/18	ECC+2	Negative	Negative	Negative	Negative	0
38	>3	1-3	No	ASCUS	Non-HPV 16/18	ECC	Negative	Negative	Negative	Negative	0
55	>3	1-3	Yes	LSIL	Non-HPV 16/18	ECC	Negative	Negative	Negative	Negative	0
46	>3	1-3	No	LSIL	Non-HPV 16/18	ECC+4	Negative	Negative	Negative	Negative	0
51	>3	1-3	No	ASCUS	Non-HPV 16/18	ECC+4	Negative	Negative	Negative	Negative	0
53	>3	1-3	No	ASCUS	Non-HPV 16/18	ECC+4	Negative	Negative	Negative	Negative	0
56	>3	1-3	Yes	ASCUS	Non-HPV 16/18	ECC+4	Negative	Negative	Negative	Negative	0
53	>3	1-3	Yes	ASCUS	Non-HPV 16/18	ECC+4	LSIL	Negative	CIN1	LSIL	0
51	1-3	1-3	Yes	NILM	Non-HPV 16/18	ECC+4	LSIL	Negative	CIN1	LSIL	0
46	>3	1-3	No	LSIL	Non-HPV 16/18	ECC+4	LSIL	Negative	CIN1	LSIL	0
47	1-3	1-3	Yes	LSIL	Non-HPV 16/18	ECC+4	Negative	Negative	Negative	Negative	0
56	1-3	1-3	Yes	NILM	Non-HPV 16/18	ECC+3	Negative	Negative	Negative	Negative	0
42	1-3	1-3	No	ASCUS	Non-HPV 16/18	ECC+3	LSIL	Negative	CIN1	LSIL	0
54	1-3	1-3	Yes	LSIL	Non-HPV 16/18	ECC+4	Negative	Negative	Negative	Negative	0
30	1-3	1-3	No	ASCUS	Non-HPV 16/18	ECC+4	LSIL	Negative	CIN1	LSIL	0
48	1-3	1-3	No	NILM	Non-HPV 16/18	ECC+4	LSIL	Negative	CIN1	LSIL	0
32	1-3	1-3	No	NILM	Non-HPV 16/18	ECC+4	Negative	Negative	Negative	Negative	0
39	>3	1-3	No	NILM	Non-HPV 16/18	ECC+4	Negative	Negative	Negative	Negative	0
59	>3	1-3	Yes	LSIL	Non-HPV 16/18	ECC+4	Negative	Negative	Negative	Negative	0
37	1-3	1-3	No	ASCUS	Non-HPV 16/18	ECC+4	HSIL+	Negative	CIN2	HSIL+	1
42	1-3	1-3	No	NILM	Non-HPV 16/18	ECC+4	Negative	Negative	Negative	Negative	0
52	1-3	1-3	No	LSIL	HPV 16/18	ECC+4	Negative	Negative	Negative	Negative	0
53	1-3	1-3	Yes	NILM	Non-HPV 16/18	ECC+1	Negative	Negative	Negative	Negative	0
43	1-3	1-3	No	NILM	Non-HPV 16/18	ECC+4	Negative	Negative	Negative	Negative	0
40	>3	1-3	No	LSIL	Non-HPV 16/18	ECC+4	LSIL	Negative	CIN1	LSIL	0
65	1-3	1-3	Yes	ASCUS	Negative	ECC+4	Negative	Negative	Negative	Negative	0
69	>3	1-3	Yes	NILM	Non-HPV 16/18	ECC+2	Negative	Negative	Negative	Negative	0
54	1-3	1-3	Yes	ASCUS	Non-HPV 16/18	ECC+4	LSIL	LSIL	CIN1	LSIL	0
28	1-3	1-3	No	ASCUS	Non-HPV 16/18	ECC+4	Negative	Negative	Negative	Negative	0
32	>3	1-3	No	ASCUS	HPV 16/18	ECC+4	Negative	Negative	Negative	Negative	0
52	1-3	1-3	Yes	NILM	Non-HPV 16/18	ECC+4	Negative	Negative	Negative	Negative	0
32	>3	1-3	No	NILM	Non-HPV 16/18	ECC+4	Negative	Negative	Negative	Negative	0
34	1-3	1-3	No	ASCUS	Non-HPV 16/18	ECC+4	Negative	Negative	Negative	Negative	0
42	>3	0	No	ASCUS	Non-HPV 16/18	ECC+4	LSIL	Negative	CIN1	LSIL	0
51	1-3	1-3	Yes	NILM	Non-HPV 16/18	ECC+4	Negative	Negative	Negative	Negative	0
37	>3	1-3	No	ASCUS	HPV 16/18	ECC+4	LSIL	Negative	CIN1	LSIL	0
38	>3	1-3	No	LSIL	Non-HPV 16/18	ECC+4	Negative	Negative	Negative	Negative	0
49	1-3	1-3	No	ASCUS	Non-HPV 16/18	ECC+4	Negative	Negative	Negative	Negative	0
65	>3	1-3	Yes	LSIL	Negative	ECC+4	Negative	Negative	Negative	Negative	0
41	1-3	1-3	No	NILM	Non-HPV 16/18	ECC+4	Negative	Negative	Negative	Negative	0
65	1-3	1-3	Yes	LSIL	HPV 16/18	ECC+4	Negative	Negative	Negative	Negative	0
33	1-3	1-3	No	ASCUS	HPV 16/18	ECC+4	LSIL	Negative	CIN1	LSIL	0
31	>3	1-3	No	NILM	Non-HPV 16/18	ECC+4	Negative	Negative	Negative	Negative	0
56	>3	1-3	Yes	LSIL	Non-HPV 16/18	ECC+4	LSIL	Negative	CIN1	LSIL	0
53	>3	1-3	Yes	NILM	Non-HPV 16/18	ECC+4	LSIL	Negative	CIN1	LSIL	0
56	1-3	1-3	Yes	ASCUS	Non-HPV 16/18	ECC	Negative	Negative	Negative	Negative	0
59	1-3	1-3	Yes	NILM	Non-HPV 16/18	ECC+4	Negative	Negative	Negative	Negative	0
45	1-3	1-3	No	ASCUS	Non-HPV 16/18	ECC+2	Negative	Negative	Negative	Negative	0
58	1-3	1-3	Yes	ASCUS	Non-HPV 16/18	ECC+4	Negative	LSIL	CIN1	LSIL	0
58	>3	1-3	Yes	NILM	HPV 16/18	ECC+4	LSIL	Negative	CIN1	LSIL	0
51	1-3	1-3	Yes	NILM	Non-HPV 16/18	ECC+2	LSIL	Negative	CIN1	LSIL	0
51	1-3	1-3	No	NILM	Non-HPV 16/18	ECC	Negative	Negative	Negative	Negative	0
39	>3	1-3	No	ASCUS	HPV 16/18	ECC+3	Negative	Negative	Negative	Negative	0
45	1-3	1-3	No	NILM	Non-HPV 16/18	ECC+3	Negative	Negative	Negative	Negative	0
61	1-3	1-3	Yes	NILM	Non-HPV 16/18	ECC+2	Negative	Negative	Negative	Negative	0
41	>3	1-3	No	ASCUS	Non-HPV 16/18	ECC+3	Negative	Negative	Negative	Negative	0
36	>3	1-3	No	NILM	Negative	ECC+4	Negative	Negative	Negative	Negative	0
46	1-3	1-3	Yes	NILM	Non-HPV 16/18	ECC+3	Negative	Negative	Negative	Negative	0
44	>3	1-3	No	ASCUS	Non-HPV 16/18	ECC+4	Negative	Negative	Negative	Negative	0
53	1-3	1-3	No	ASCUS	Non-HPV 16/18	ECC+2	LSIL	Negative	CIN1	LSIL	0
43	>3	1-3	No	ASCUS	Non-HPV 16/18	ECC+4	Negative	Negative	Negative	Negative	0
32	>3	1-3	No	LSIL	Non-HPV 16/18	ECC+3	Negative	Negative	Negative	Negative	0
59	>3	1-3	Yes	ASCUS	Non-HPV 16/18	ECC+4	LSIL	Negative	CIN1	LSIL	0
39	>3	1-3	No	ASCUS	Non-HPV 16/18	ECC+3	Negative	Negative	Negative	Negative	0
44	1-3	1-3	No	ASCUS	Non-HPV 16/18	ECC+4	Negative	Negative	Negative	Negative	0
46	1-3	1-3	No	ASCUS	Non-HPV 16/18	ECC+4	LSIL	Negative	CIN1	LSIL	0
38	1-3	1-3	No	LSIL	Non-HPV 16/18	ECC+3	Negative	Negative	Negative	Negative	0
34	>3	1-3	No	NILM	HPV 16/18	ECC+4	Negative	Negative	Negative	Negative	0
44	>3	1-3	No	LSIL	Non-HPV 16/18	ECC+4	Negative	Negative	Negative	Negative	0
56	1-3	1-3	Yes	NILM	Non-HPV 16/18	ECC+4	Negative	Negative	Negative	Negative	0
48	1-3	1-3	No	NILM	HPV 16/18	ECC+4	LSIL	Negative	CIN1	LSIL	0
42	1-3	1-3	No	ASCUS	Non-HPV 16/18	ECC+4	LSIL	Negative	CIN1	LSIL	0
65	>3	1-3	Yes	ASCUS	Non-HPV 16/18	ECC+2	Negative	Negative	Negative	Negative	0
55	1-3	1-3	Yes	ASCUS	Negative	ECC+2	Negative	Negative	Negative	Negative	0
55	1-3	1-3	Yes	NILM	Non-HPV 16/18	ECC+1	Negative	Negative	Negative	Negative	0
57	>3	1-3	Yes	NILM	Non-HPV 16/18	ECC+1	LSIL	Negative	CIN1	LSIL	0
43	1-3	1-3	No	LSIL	Non-HPV 16/18	ECC+4	Negative	Negative	Negative	Negative	0
57	1-3	1-3	Yes	NILM	HPV 16/18	ECC+2	LSIL	Negative	CIN1	LSIL	0
31	1-3	0	No	ASCUS	Non-HPV 16/18	ECC+3	LSIL	LSIL	CIN1	LSIL	0
50	1-3	1-3	No	LSIL	Non-HPV 16/18	ECC+4	Negative	Negative	Negative	Negative	0
36	0	0	No	LSIL	Non-HPV 16/18	ECC+4	LSIL	Negative	CIN1	LSIL	0
49	>3	1-3	No	NILM	Non-HPV 16/18	ECC+4	Negative	Negative	Negative	Negative	0
32	>3	1-3	No	ASCUS	Non-HPV 16/18	ECC+4	LSIL	Negative	CIN1	LSIL	0
53	1-3	1-3	Yes	NILM	HPV 16/18	ECC+4	Negative	Negative	Negative	Negative	0
41	1-3	1-3	No	ASCUS	Non-HPV 16/18	ECC+3	Negative	Negative	Negative	Negative	0
54	1-3	1-3	Yes	ASCUS	Non-HPV 16/18	ECC+4	Negative	Negative	Negative	Negative	0
56	>3	1-3	Yes	LSIL	Non-HPV 16/18	ECC+2	Negative	Negative	Negative	Negative	0
59	1-3	1-3	Yes	ASCUS	Non-HPV 16/18	ECC+4	LSIL	LSIL	CIN1	LSIL	0
36	1-3	1-3	No	ASCUS	Non-HPV 16/18	ECC+4	LSIL	HSIL+	CIN2	HSIL+	1
57	>3	1-3	Yes	ASCUS	Non-HPV 16/18	ECC+3	Negative	Negative	Negative	Negative	0
42	>3	1-3	No	NILM	Non-HPV 16/18	ECC+2	LSIL	Negative	CIN1	LSIL	0
44	1-3	1-3	Yes	ASC-H/HSIL/AGC	Non-HPV 16/18	ECC+3	Negative	Negative	Negative	Negative	0
30	>3	1-3	No	NILM	HPV 16/18	ECC+4	Negative	Negative	Negative	Negative	0
64	>3	1-3	Yes	ASCUS	Non-HPV 16/18	ECC+1	Negative	Negative	Negative	Negative	0
40	1-3	1-3	No	LSIL	Non-HPV 16/18	ECC+4	LSIL	HSIL+	CIN3+	HSIL+	1
39	>3	1-3	No	NILM	HPV 16/18	ECC+4	Negative	Negative	Negative	Negative	0
37	1-3	1-3	No	LSIL	Non-HPV 16/18	ECC+4	Negative	Negative	Negative	Negative	0
48	1-3	1-3	No	NILM	Non-HPV 16/18	ECC+2	LSIL	LSIL	CIN1	LSIL	0
51	1-3	1-3	Yes	NILM	HPV 16/18	ECC+3	Negative	Negative	Negative	Negative	0
36	1-3	1-3	No	ASCUS	HPV 16/18	ECC+4	Negative	Negative	Negative	Negative	0
56	>3	1-3	Yes	LSIL	Non-HPV 16/18	ECC+4	LSIL	Negative	CIN1	LSIL	0
26	1-3	0	No	NILM	Non-HPV 16/18	ECC+3	Negative	Negative	Negative	Negative	0
55	1-3	1-3	Yes	NILM	Non-HPV 16/18	ECC+4	Negative	Negative	Negative	Negative	0
26	1-3	1-3	No	NILM	Non-HPV 16/18	ECC+2	Negative	Negative	Negative	Negative	0
41	1-3	1-3	No	ASCUS	Non-HPV 16/18	ECC+3	LSIL	Negative	CIN1	LSIL	0
38	1-3	1-3	No	LSIL	Non-HPV 16/18	ECC+4	Negative	HSIL+	CIN2	HSIL+	1
51	>3	1-3	Yes	NILM	Non-HPV 16/18	ECC+3	Negative	Negative	Negative	Negative	0
47	1-3	1-3	No	LSIL	Non-HPV 16/18	ECC+2	Negative	Negative	Negative	Negative	0
59	1-3	1-3	Yes	NILM	Non-HPV 16/18	ECC+4	Negative	Negative	Negative	Negative	0
58	1-3	1-3	Yes	ASCUS	Non-HPV 16/18	ECC+2	Negative	Negative	Negative	Negative	0
54	1-3	1-3	Yes	ASCUS	Non-HPV 16/18	ECC+2	Negative	Negative	Negative	Negative	0
31	>3	1-3	No	ASCUS	Non-HPV 16/18	ECC+2	Negative	Negative	Negative	Negative	0
54	>3	>3	Yes	ASCUS	Non-HPV 16/18	ECC+2	Negative	Negative	Negative	Negative	0
38	1-3	1-3	No	NILM	HPV 16/18	ECC+1	Negative	Negative	Negative	Negative	0
40	1-3	1-3	Yes	ASCUS	Non-HPV 16/18	ECC+3	HSIL+	Negative	CIN2	HSIL+	1
53	1-3	1-3	No	NILM	Non-HPV 16/18	ECC+2	Negative	Negative	Negative	Negative	0
55	1-3	1-3	Yes	LSIL	HPV 16/18	ECC+3	Negative	Negative	Negative	Negative	0
56	1-3	1-3	Yes	NILM	Non-HPV 16/18	ECC+3	Negative	Negative	Negative	Negative	0
43	1-3	1-3	No	LSIL	Negative	ECC+1	Negative	Negative	Negative	Negative	0
62	1-3	1-3	Yes	NILM	Non-HPV 16/18	ECC+1	Negative	Negative	Negative	Negative	0
32	1-3	1-3	No	NILM	Non-HPV 16/18	ECC+2	Negative	Negative	Negative	Negative	0
50	1-3	1-3	Yes	NILM	Negative	ECC+2	Negative	Negative	Negative	Negative	0
33	1-3	1-3	No	ASCUS	Non-HPV 16/18	ECC+2	LSIL	Negative	CIN1	LSIL	0
22	0	0	No	ASCUS	HPV 16/18	ECC+3	Negative	Negative	Negative	Negative	0
34	0	0	No	LSIL	Non-HPV 16/18	ECC+4	LSIL	Negative	CIN1	LSIL	0
48	1-3	1-3	No	ASC-H/HSIL/AGC	Non-HPV 16/18	ECC+4	LSIL	Negative	CIN1	LSIL	0
58	1-3	1-3	Yes	LSIL	Non-HPV 16/18	ECC+2	Negative	Negative	Negative	Negative	0
27	0	0	No	NILM	HPV 16/18	ECC+2	Negative	HSIL+	CIN3+	HSIL+	1
57	1-3	1-3	Yes	ASCUS	HPV 16/18	ECC+4	Negative	Negative	Negative	Negative	0
49	1-3	1-3	No	NILM	Non-HPV 16/18	ECC+4	Negative	Negative	Negative	Negative	0
56	1-3	1-3	Yes	NILM	Non-HPV 16/18	ECC+3	LSIL	Negative	CIN1	LSIL	0
52	1-3	1-3	Yes	NILM	HPV 16/18	ECC+2	LSIL	HSIL+	CIN3+	HSIL+	1
50	>3	1-3	Yes	ASCUS	Non-HPV 16/18	ECC+3	LSIL	Negative	CIN1	LSIL	0
26	1-3	0	No	NILM	Non-HPV 16/18	ECC+3	Negative	Negative	Negative	Negative	0
30	0	0	No	LSIL	Non-HPV 16/18	ECC+3	LSIL	Negative	CIN1	LSIL	0
42	>3	1-3	No	LSIL	Non-HPV 16/18	ECC+4	Negative	Negative	Negative	Negative	0
25	1-3	0	No	ASCUS	Non-HPV 16/18	ECC+2	Negative	Negative	Negative	Negative	0
33	1-3	1-3	No	NILM	Negative	ECC+2	Negative	Negative	Negative	Negative	0
56	1-3	1-3	Yes	ASCUS	Negative	ECC+2	Negative	Negative	Negative	Negative	0
52	1-3	1-3	Yes	NILM	HPV 16/18	ECC+3	LSIL	Negative	CIN1	LSIL	0
47	1-3	1-3	No	LSIL	Negative	ECC+3	Negative	Negative	Negative	Negative	0
45	1-3	1-3	No	ASCUS	Non-HPV 16/18	ECC+2	Negative	Negative	Negative	Negative	0
29	1-3	1-3	No	NILM	Non-HPV 16/18	ECC+4	LSIL	Negative	CIN1	LSIL	0
35	1-3	0	No	NILM	HPV 16/18	ECC+1	Negative	Negative	Negative	Negative	0
57	>3	1-3	Yes	ASCUS	Non-HPV 16/18	ECC+2	Negative	Negative	Negative	Negative	0
39	1-3	1-3	No	ASCUS	HPV 16/18	ECC+2	Negative	Negative	Negative	Negative	0
31	1-3	1-3	No	ASCUS	Non-HPV 16/18	ECC+4	LSIL	Negative	CIN1	LSIL	0
43	1-3	1-3	No	ASCUS	Non-HPV 16/18	ECC+3	Negative	Negative	Negative	Negative	0
59	1-3	1-3	Yes	NILM	Non-HPV 16/18	ECC+3	Negative	Negative	Negative	Negative	0
54	1-3	1-3	Yes	ASCUS	Non-HPV 16/18	ECC+2	Negative	Negative	Negative	Negative	0
48	>3	1-3	No	LSIL	Negative	ECC+3	Negative	Negative	Negative	Negative	0
50	1-3	1-3	No	NILM	Non-HPV 16/18	ECC+1	Negative	Negative	Negative	Negative	0
39	1-3	1-3	No	NILM	Non-HPV 16/18	ECC+1	Negative	Negative	Negative	Negative	0
54	1-3	1-3	Yes	NILM	HPV 16/18	ECC+2	Negative	Negative	Negative	Negative	0
32	1-3	1-3	No	NILM	Non-HPV 16/18	ECC	Negative	Negative	Negative	Negative	0
52	>3	1-3	No	ASCUS	Non-HPV 16/18	ECC+1	Negative	LSIL	CIN1	LSIL	0
65	>3	1-3	Yes	NILM	Non-HPV 16/18	ECC+3	LSIL	Negative	CIN1	LSIL	0
54	>3	1-3	Yes	LSIL	Non-HPV 16/18	ECC+2	Negative	Negative	Negative	Negative	0
53	1-3	1-3	Yes	LSIL	Non-HPV 16/18	ECC+2	Negative	Negative	Negative	Negative	0
39	>3	1-3	No	NILM	HPV 16/18	ECC+1	LSIL	Negative	CIN1	LSIL	0
57	1-3	1-3	Yes	ASCUS	Non-HPV 16/18	ECC+3	Negative	Negative	Negative	Negative	0
43	>3	1-3	No	ASCUS	Non-HPV 16/18	ECC+3	LSIL	Negative	CIN1	LSIL	0
45	>3	1-3	Yes	ASCUS	Non-HPV 16/18	ECC+1	Negative	Negative	Negative	Negative	0
49	>3	1-3	No	NILM	HPV 16/18	ECC+4	Negative	Negative	Negative	Negative	0
44	1-3	1-3	No	NILM	Non-HPV 16/18	ECC+1	Negative	Negative	Negative	Negative	0
48	>3	1-3	No	ASCUS	Non-HPV 16/18	ECC+2	LSIL	Negative	CIN1	LSIL	0
42	1-3	1-3	No	ASCUS	HPV 16/18	ECC+2	Negative	Negative	Negative	Negative	0
36	1-3	1-3	No	ASCUS	Non-HPV 16/18	ECC+1	Negative	Negative	Negative	Negative	0
58	1-3	1-3	Yes	NILM	Non-HPV 16/18	ECC+2	LSIL	Negative	CIN1	LSIL	0
49	>3	1-3	Yes	LSIL	HPV 16/18	ECC+2	Negative	Negative	Negative	Negative	0
48	>3	1-3	No	NILM	Negative	ECC+2	Negative	Negative	Negative	Negative	0
57	>3	1-3	Yes	NILM	Non-HPV 16/18	ECC+2	Negative	Negative	Negative	Negative	0
56	1-3	1-3	Yes	ASCUS	HPV 16/18	ECC+2	Negative	Negative	Negative	Negative	0
36	>3	1-3	No	LSIL	Non-HPV 16/18	ECC+2	Negative	Negative	Negative	Negative	0
50	1-3	1-3	Yes	ASCUS	Non-HPV 16/18	ECC+3	Negative	Negative	Negative	Negative	0
46	>3	1-3	No	ASC-H/HSIL/AGC	HPV 16/18	ECC+2	Negative	Negative	Negative	Negative	0
56	1-3	1-3	Yes	LSIL	HPV 16/18	ECC+1	Negative	Negative	Negative	Negative	0
60	1-3	1-3	Yes	ASCUS	Non-HPV 16/18	ECC+1	Negative	Negative	Negative	Negative	0
46	1-3	1-3	No	NILM	Non-HPV 16/18	ECC+2	LSIL	Negative	CIN1	LSIL	0
55	1-3	1-3	Yes	NILM	Non-HPV 16/18	ECC+1	LSIL	Negative	CIN1	LSIL	0
58	1-3	1-3	Yes	NILM	Non-HPV 16/18	ECC+1	Negative	Negative	Negative	Negative	0
53	>3	1-3	Yes	NILM	Non-HPV 16/18	ECC+2	LSIL	Negative	CIN1	LSIL	0
51	1-3	1-3	Yes	NILM	HPV 16/18	ECC+1	LSIL	Negative	CIN1	LSIL	0
39	>3	1-3	No	NILM	Non-HPV 16/18	ECC+1	Negative	Negative	Negative	Negative	0
72	>3	1-3	Yes	ASCUS	Non-HPV 16/18	ECC+1	LSIL	Negative	CIN1	LSIL	0
43	1-3	1-3	No	LSIL	Non-HPV 16/18	ECC+3	LSIL	Negative	CIN1	LSIL	0
43	>3	1-3	No	ASCUS	HPV 16/18	ECC+3	LSIL	Negative	CIN1	LSIL	0
49	>3	1-3	No	LSIL	Non-HPV 16/18	ECC+2	Negative	Negative	Negative	Negative	0
57	1-3	1-3	Yes	NILM	HPV 16/18	ECC+4	Negative	Negative	Negative	Negative	0
32	1-3	1-3	No	NILM	Non-HPV 16/18	ECC+2	Negative	Negative	Negative	Negative	0
52	1-3	1-3	Yes	NILM	Non-HPV 16/18	ECC+2	Negative	LSIL	CIN1	LSIL	0
40	1-3	1-3	No	LSIL	Non-HPV 16/18	ECC+2	Negative	Negative	Negative	Negative	0
40	1-3	1-3	No	ASCUS	Non-HPV 16/18	ECC+3	Negative	Negative	Negative	Negative	0
23	0	0	No	ASCUS	HPV 16/18	ECC+4	LSIL	LSIL	CIN1	LSIL	0
46	>3	1-3	Yes	NILM	HPV 16/18	ECC+2	Negative	Negative	Negative	Negative	0
40	>3	1-3	No	NILM	HPV 16/18	ECC+2	Negative	Negative	Negative	Negative	0
51	1-3	1-3	Yes	NILM	HPV 16/18	ECC+2	Negative	Negative	Negative	Negative	0
56	1-3	1-3	Yes	NILM	HPV 16/18	ECC+4	LSIL	Negative	CIN1	LSIL	0
30	>3	1-3	No	NILM	Negative	ECC+4	Negative	Negative	Negative	Negative	0
50	>3	1-3	Yes	ASCUS	Non-HPV 16/18	ECC+4	Negative	Negative	Negative	Negative	0
20	0	0	No	NILM	HPV 16/18	ECC+4	Negative	Negative	Negative	Negative	0
46	>3	1-3	No	ASC-H/HSIL/AGC	Non-HPV 16/18	ECC+4	LSIL	LSIL	CIN1	LSIL	0
52	1-3	1-3	Yes	ASCUS	Non-HPV 16/18	ECC+3	Negative	Negative	Negative	Negative	0
45	1-3	1-3	No	NILM	Non-HPV 16/18	ECC+3	Negative	Negative	Negative	Negative	0
30	1-3	1-3	No	ASCUS	Non-HPV 16/18	ECC+2	LSIL	Negative	CIN1	LSIL	0
47	0	0	No	ASCUS	Non-HPV 16/18	ECC+2	Negative	Negative	Negative	Negative	0
45	1-3	1-3	No	ASCUS	Non-HPV 16/18	ECC	Negative	Negative	Negative	Negative	0
49	>3	1-3	Yes	ASCUS	Non-HPV 16/18	ECC+3	HSIL+	Negative	CIN2	HSIL+	1
40	1-3	1-3	No	ASCUS	Negative	ECC+3	LSIL	Negative	CIN1	LSIL	0
38	>3	1-3	No	ASCUS	Non-HPV 16/18	ECC+3	Negative	Negative	Negative	Negative	0
41	1-3	1-3	No	ASCUS	Non-HPV 16/18	ECC+3	Negative	Negative	Negative	Negative	0
43	1-3	1-3	No	LSIL	Non-HPV 16/18	ECC+2	LSIL	Negative	CIN1	LSIL	0
42	1-3	1-3	No	NILM	Non-HPV 16/18	ECC+3	Negative	Negative	Negative	Negative	0
57	1-3	1-3	Yes	ASCUS	Negative	ECC+1	Negative	Negative	Negative	Negative	0
57	>3	>3	Yes	NILM	HPV 16/18	ECC+3	Negative	Negative	Negative	Negative	0
55	>3	1-3	Yes	NILM	HPV 16/18	ECC+2	Negative	Negative	Negative	Negative	0
34	1-3	0	No	ASCUS	Non-HPV 16/18	ECC+3	Negative	Negative	Negative	Negative	0
48	1-3	1-3	No	ASCUS	Non-HPV 16/18	ECC+4	Negative	Negative	Negative	Negative	0
58	>3	1-3	Yes	ASCUS	HPV 16/18	ECC+2	Negative	Negative	Negative	Negative	0
56	1-3	1-3	Yes	NILM	HPV 16/18	ECC+2	LSIL	Negative	CIN1	LSIL	0
34	1-3	1-3	No	ASC-H/HSIL/AGC	Non-HPV 16/18	ECC+4	LSIL	Negative	CIN1	LSIL	0
34	1-3	1-3	No	NILM	HPV 16/18	ECC+4	LSIL	Negative	CIN1	LSIL	0
42	1-3	1-3	No	NILM	HPV 16/18	ECC+2	Negative	Negative	Negative	Negative	0
53	>3	1-3	Yes	ASCUS	Negative	ECC+3	LSIL	Negative	CIN1	LSIL	0
52	>3	1-3	Yes	ASCUS	Non-HPV 16/18	ECC+4	Negative	Negative	Negative	Negative	0
35	>3	1-3	No	LSIL	Non-HPV 16/18	ECC+2	Negative	Negative	Negative	Negative	0
53	1-3	1-3	Yes	ASCUS	Non-HPV 16/18	ECC+4	Negative	Negative	Negative	Negative	0
57	1-3	1-3	Yes	NILM	Non-HPV 16/18	ECC+4	Negative	Negative	Negative	Negative	0
55	1-3	1-3	Yes	ASCUS	Non-HPV 16/18	ECC+4	Negative	Negative	Negative	Negative	0
56	1-3	1-3	Yes	NILM	HPV 16/18	ECC+4	Negative	Negative	Negative	Negative	0
50	>3	1-3	Yes	LSIL	Non-HPV 16/18	ECC+4	Negative	Negative	Negative	Negative	0
32	1-3	1-3	No	NILM	Non-HPV 16/18	ECC+4	Negative	Negative	Negative	Negative	0
45	>3	1-3	Yes	LSIL	Non-HPV 16/18	ECC+2	Negative	Negative	Negative	Negative	0
63	>3	>3	Yes	NILM	Non-HPV 16/18	ECC+3	Negative	Negative	Negative	Negative	0
58	1-3	1-3	Yes	LSIL	Non-HPV 16/18	ECC+4	Negative	Negative	Negative	Negative	0
43	>3	1-3	No	NILM	HPV 16/18	ECC+3	Negative	Negative	Negative	Negative	0
32	>3	1-3	No	NILM	Negative	ECC+2	Negative	Negative	Negative	Negative	0
47	>3	1-3	No	ASCUS	Non-HPV 16/18	ECC+2	Negative	Negative	Negative	Negative	0
46	1-3	1-3	No	LSIL	Non-HPV 16/18	ECC+4	Negative	Negative	Negative	Negative	0
50	1-3	1-3	No	NILM	HPV 16/18	ECC+3	LSIL	Negative	CIN1	LSIL	0
60	>3	1-3	Yes	NILM	HPV 16/18	ECC+2	Negative	Negative	Negative	Negative	0
65	1-3	1-3	Yes	NILM	HPV 16/18	ECC+3	Negative	Negative	Negative	Negative	0
48	>3	1-3	No	LSIL	Non-HPV 16/18	ECC+1	LSIL	LSIL	CIN1	LSIL	0
41	>3	1-3	No	NILM	HPV 16/18	ECC+4	Negative	Negative	Negative	Negative	0
51	1-3	1-3	No	NILM	Non-HPV 16/18	ECC	Negative	Negative	Negative	Negative	0
45	1-3	1-3	No	NILM	HPV 16/18	ECC+4	LSIL	Negative	CIN1	LSIL	0
39	1-3	1-3	No	ASCUS	Non-HPV 16/18	ECC+4	Negative	Negative	Negative	Negative	0
47	>3	1-3	No	NILM	Non-HPV 16/18	ECC+4	LSIL	Negative	CIN1	LSIL	0
39	1-3	1-3	No	ASCUS	Non-HPV 16/18	ECC+4	LSIL	Negative	CIN1	LSIL	0
35	1-3	1-3	No	LSIL	Negative	ECC+3	LSIL	Negative	CIN1	LSIL	0
50	1-3	1-3	Yes	LSIL	Non-HPV 16/18	ECC+4	Negative	Negative	Negative	Negative	0
33	1-3	1-3	No	ASCUS	HPV 16/18	ECC+4	LSIL	Negative	CIN1	LSIL	0
55	1-3	1-3	Yes	LSIL	Non-HPV 16/18	ECC+3	LSIL	Negative	CIN1	LSIL	0
38	>3	1-3	No	NILM	Non-HPV 16/18	ECC+2	Negative	Negative	Negative	Negative	0
35	>3	1-3	No	ASCUS	Non-HPV 16/18	ECC+4	Negative	Negative	Negative	Negative	0
57	>3	1-3	Yes	ASCUS	Non-HPV 16/18	ECC+2	LSIL	Negative	CIN1	LSIL	0
59	1-3	1-3	Yes	NILM	Non-HPV 16/18	ECC+3	LSIL	Negative	CIN1	LSIL	0
26	1-3	0	No	ASCUS	Non-HPV 16/18	ECC+4	Negative	Negative	Negative	Negative	0
62	1-3	1-3	Yes	ASCUS	Non-HPV 16/18	ECC+4	LSIL	Negative	CIN1	LSIL	0
25	1-3	0	No	NILM	HPV 16/18	ECC+3	LSIL	LSIL	CIN1	LSIL	0
38	1-3	1-3	No	NILM	Negative	ECC+1	Negative	Negative	Negative	Negative	0
58	1-3	1-3	Yes	NILM	HPV 16/18	ECC+4	LSIL	Negative	CIN1	LSIL	0
59	1-3	1-3	Yes	NILM	Non-HPV 16/18	ECC+2	Negative	Negative	Negative	Negative	0
60	>3	1-3	Yes	NILM	Non-HPV 16/18	ECC+4	Negative	Negative	Negative	Negative	0
42	>3	1-3	No	NILM	Negative	ECC+4	Negative	Negative	Negative	Negative	0
54	1-3	1-3	Yes	NILM	Non-HPV 16/18	ECC+4	Negative	Negative	Negative	Negative	0
41	>3	1-3	No	ASCUS	HPV 16/18	ECC+4	LSIL	Negative	CIN1	LSIL	0
55	1-3	1-3	Yes	ASCUS	Non-HPV 16/18	ECC+3	Negative	LSIL	CIN1	LSIL	0
50	>3	1-3	No	NILM	HPV 16/18	ECC+4	Negative	Negative	Negative	Negative	0
58	1-3	1-3	Yes	NILM	Non-HPV 16/18	ECC+4	Negative	Negative	Negative	Negative	0
59	>3	1-3	Yes	LSIL	Non-HPV 16/18	ECC+4	Negative	Negative	Negative	Negative	0
50	1-3	1-3	No	ASCUS	Non-HPV 16/18	ECC+2	Negative	Negative	Negative	Negative	0
50	>3	1-3	No	NILM	Non-HPV 16/18	ECC+3	Negative	Negative	Negative	Negative	0
65	1-3	1-3	Yes	NILM	HPV 16/18	ECC+3	HSIL+	HSIL+	CIN3+	HSIL+	1
56	1-3	1-3	No	ASCUS	Non-HPV 16/18	ECC+4	LSIL	Negative	CIN1	LSIL	0
47	1-3	1-3	No	NILM	Non-HPV 16/18	ECC+4	Negative	Negative	Negative	Negative	0
60	1-3	1-3	Yes	ASCUS	Non-HPV 16/18	ECC+4	LSIL	Negative	CIN1	LSIL	0
33	1-3	1-3	No	LSIL	Non-HPV 16/18	ECC+3	LSIL	Negative	CIN1	LSIL	0
53	>3	1-3	Yes	NILM	Non-HPV 16/18	ECC+2	LSIL	LSIL	CIN1	LSIL	0
65	1-3	1-3	Yes	ASCUS	Non-HPV 16/18	ECC+2	Negative	Negative	Negative	Negative	0
29	1-3	0	No	ASCUS	Non-HPV 16/18	ECC+3	LSIL	Negative	CIN1	LSIL	0
43	1-3	1-3	No	ASCUS	Non-HPV 16/18	ECC+2	LSIL	Negative	CIN1	LSIL	0
50	>3	1-3	No	NILM	Negative	ECC+1	Negative	Negative	Negative	Negative	0
56	>3	1-3	Yes	ASCUS	HPV 16/18	ECC+4	LSIL	Negative	CIN1	LSIL	0
20	1-3	0	No	ASCUS	Non-HPV 16/18	ECC	Negative	Negative	Negative	Negative	0
47	>3	1-3	No	LSIL	Non-HPV 16/18	ECC+2	Negative	Negative	Negative	Negative	0
47	1-3	1-3	No	NILM	HPV 16/18	ECC+2	LSIL	LSIL	CIN1	LSIL	0
45	>3	1-3	Yes	NILM	Non-HPV 16/18	ECC+1	Negative	Negative	Negative	Negative	0
51	1-3	1-3	Yes	NILM	Non-HPV 16/18	ECC+1	Negative	Negative	Negative	Negative	0
25	1-3	1-3	No	ASCUS	Negative	ECC+2	LSIL	LSIL	CIN1	LSIL	0
62	1-3	1-3	Yes	NILM	Non-HPV 16/18	ECC+2	Negative	LSIL	CIN1	LSIL	0
39	1-3	0	No	LSIL	Non-HPV 16/18	ECC+2	LSIL	LSIL	CIN1	LSIL	0
56	1-3	1-3	Yes	LSIL	Non-HPV 16/18	ECC+3	LSIL	Negative	CIN1	LSIL	0
57	1-3	1-3	Yes	ASCUS	Non-HPV 16/18	ECC+4	LSIL	LSIL	CIN1	LSIL	0
29	1-3	1-3	No	NILM	HPV 16/18	ECC+4	LSIL	Negative	CIN1	LSIL	0
45	>3	1-3	Yes	ASC-H/HSIL/AGC	Non-HPV 16/18	ECC+4	Negative	HSIL+	CIN3+	HSIL+	1
44	1-3	1-3	No	NILM	HPV 16/18	ECC+3	Negative	Negative	Negative	Negative	0
35	1-3	1-3	No	ASC-H/HSIL/AGC	HPV 16/18	ECC+4	Negative	Negative	Negative	Negative	0
53	1-3	1-3	Yes	LSIL	Non-HPV 16/18	ECC+3	Negative	Negative	Negative	Negative	0
43	>3	1-3	No	NILM	Non-HPV 16/18	ECC+2	Negative	Negative	Negative	Negative	0
34	1-3	1-3	No	NILM	HPV 16/18	ECC+2	Negative	Negative	Negative	Negative	0
51	>3	1-3	Yes	ASCUS	Non-HPV 16/18	ECC+2	Negative	Negative	Negative	Negative	0
60	>3	>3	Yes	ASCUS	HPV 16/18	ECC+4	Negative	Negative	Negative	Negative	0
53	1-3	1-3	Yes	ASCUS	Non-HPV 16/18	ECC+2	LSIL	Negative	CIN1	LSIL	0
54	1-3	1-3	No	ASCUS	Non-HPV 16/18	ECC+4	Negative	Negative	Negative	Negative	0
54	>3	1-3	Yes	LSIL	Non-HPV 16/18	ECC+1	Negative	Negative	Negative	Negative	0
35	0	0	No	ASCUS	Non-HPV 16/18	ECC	Negative	Negative	Negative	Negative	0
28	1-3	1-3	No	ASCUS	Non-HPV 16/18	ECC+2	Negative	Negative	Negative	Negative	0
30	0	0	No	NILM	HPV 16/18	ECC+3	Negative	Negative	Negative	Negative	0
43	1-3	1-3	No	ASCUS	Non-HPV 16/18	ECC+2	Negative	Negative	Negative	Negative	0
52	>3	1-3	No	ASC-H/HSIL/AGC	Non-HPV 16/18	ECC+4	LSIL	HSIL+	CIN3+	HSIL+	1
55	1-3	1-3	Yes	NILM	Negative	ECC	Negative	Negative	Negative	Negative	0
47	>3	1-3	Yes	NILM	HPV 16/18	ECC+4	Negative	Negative	Negative	Negative	0
35	1-3	1-3	No	NILM	HPV 16/18	ECC+2	Negative	Negative	Negative	Negative	0
55	1-3	1-3	Yes	ASCUS	Non-HPV 16/18	ECC+1	Negative	Negative	Negative	Negative	0
35	>3	1-3	No	ASCUS	Non-HPV 16/18	ECC+3	Negative	Negative	Negative	Negative	0
55	1-3	1-3	Yes	LSIL	Non-HPV 16/18	ECC+3	LSIL	LSIL	CIN1	LSIL	0
45	1-3	0	No	NILM	Non-HPV 16/18	ECC+1	Negative	Negative	Negative	Negative	0
64	>3	1-3	Yes	ASCUS	HPV 16/18	ECC+2	LSIL	LSIL	CIN1	LSIL	0
50	1-3	1-3	Yes	NILM	Non-HPV 16/18	ECC+1	Negative	Negative	Negative	Negative	0
36	1-3	1-3	No	NILM	Non-HPV 16/18	ECC+2	Negative	Negative	Negative	Negative	0
41	1-3	1-3	No	LSIL	Non-HPV 16/18	ECC+1	Negative	Negative	Negative	Negative	0
53	1-3	1-3	Yes	NILM	Non-HPV 16/18	ECC+3	LSIL	Negative	CIN1	LSIL	0
52	1-3	1-3	Yes	ASCUS	Non-HPV 16/18	ECC+4	LSIL	Negative	CIN1	LSIL	0
33	>3	1-3	No	LSIL	Non-HPV 16/18	ECC+4	Negative	Negative	Negative	Negative	0
28	1-3	1-3	No	LSIL	Non-HPV 16/18	ECC	Negative	Negative	Negative	Negative	0
54	1-3	1-3	Yes	NILM	Non-HPV 16/18	ECC+2	Negative	Negative	Negative	Negative	0
45	>3	1-3	No	ASCUS	Non-HPV 16/18	ECC+2	LSIL	Negative	CIN1	LSIL	0
45	>3	1-3	No	NILM	HPV 16/18	ECC+4	Negative	Negative	Negative	Negative	0
53	1-3	1-3	Yes	ASCUS	Negative	ECC+4	HSIL+	Negative	CIN2	HSIL+	1
48	1-3	1-3	Yes	NILM	HPV 16/18	ECC+4	Negative	LSIL	CIN1	LSIL	0
60	>3	1-3	Yes	LSIL	Non-HPV 16/18	ECC+4	Negative	Negative	Negative	Negative	0
36	0	0	No	LSIL	Non-HPV 16/18	ECC+4	Negative	Negative	Negative	Negative	0
57	1-3	1-3	Yes	NILM	Non-HPV 16/18	ECC		Negative	Negative	Negative	0
45	>3	1-3	Yes	NILM	HPV 16/18	ECC+3	Negative	Negative	Negative	Negative	0
38	>3	1-3	No	ASCUS	Non-HPV 16/18	ECC+3	LSIL	Negative	CIN1	LSIL	0
40	1-3	1-3	No	NILM	HPV 16/18	ECC+2	LSIL	Negative	CIN1	LSIL	0
37	1-3	1-3	No	ASCUS	Non-HPV 16/18	ECC+2	Negative	Negative	Negative	Negative	0
40	>3	1-3	No	ASCUS	Non-HPV 16/18	ECC+2	Negative	Negative	Negative	Negative	0
62	>3	1-3	Yes	ASCUS	Non-HPV 16/18	ECC+3	Negative	Negative	Negative	Negative	0
55	>3	1-3	Yes	NILM	Non-HPV 16/18	ECC+2	LSIL	Negative	CIN1	LSIL	0
27	1-3	1-3	No	ASCUS	Non-HPV 16/18	ECC+2	LSIL	Negative	CIN1	LSIL	0
34	>3	1-3	No	NILM	Non-HPV 16/18	ECC+3	LSIL	Negative	CIN1	LSIL	0
57	>3	1-3	Yes	ASC-H/HSIL/AGC	Non-HPV 16/18	ECC+2	Negative	LSIL	CIN1	LSIL	0
35	1-3	0	No	ASCUS	Non-HPV 16/18	ECC+3	Negative	Negative	Negative	Negative	0
52	>3	1-3	Yes	NILM	HPV 16/18	ECC+2	Negative	Negative	Negative	Negative	0
31	1-3	1-3	No	ASCUS	Non-HPV 16/18	ECC+2	LSIL	Negative	CIN1	LSIL	0
55	1-3	1-3	Yes	ASCUS	Non-HPV 16/18	ECC+2	Negative	Negative	Negative	Negative	0
58	>3	1-3	Yes	ASCUS	Non-HPV 16/18	ECC	Negative	Negative	Negative	Negative	0
46	>3	1-3	Yes	NILM	HPV 16/18	ECC+3	Negative	Negative	Negative	Negative	0
26	0	0	No	ASCUS	Non-HPV 16/18	ECC+2	Negative	Negative	Negative	Negative	0
51	>3	1-3	Yes	LSIL	Negative	ECC+4	LSIL	Negative	CIN1	LSIL	0
31	1-3	1-3	No	NILM	Non-HPV 16/18	ECC+2	Negative	Negative	Negative	Negative	0
53	1-3	1-3	Yes	LSIL	Negative	ECC	Negative	Negative	Negative	Negative	0
35	>3	1-3	No	ASCUS	Non-HPV 16/18	ECC	Negative	Negative	Negative	Negative	0
49	1-3	>3	No	NILM	HPV 16/18	ECC+2	Negative	Negative	Negative	Negative	0
51	>3	1-3	No	NILM	HPV 16/18	ECC+4	LSIL	Negative	CIN1	LSIL	0
33	1-3	0	No	NILM	HPV 16/18	ECC+4	LSIL	Negative	CIN1	LSIL	0
47	1-3	1-3	No	ASCUS	Negative	ECC+2	Negative	LSIL	CIN1	LSIL	0
59	0	0	Yes	ASCUS	HPV 16/18	ECC+2	LSIL	Negative	CIN1	LSIL	0
53	>3	1-3	Yes	NILM	Non-HPV 16/18	ECC+2	Negative	Negative	Negative	Negative	0
52	1-3	1-3	No	NILM	Non-HPV 16/18	ECC+2	Negative	Negative	Negative	Negative	0
44	>3	1-3	No	ASCUS	Non-HPV 16/18	ECC+2	Negative	Negative	Negative	Negative	0
59	1-3	1-3	Yes	ASCUS	Non-HPV 16/18	ECC+4	Negative	Negative	Negative	Negative	0
47	1-3	1-3	Yes	NILM	HPV 16/18	ECC+2	Negative	Negative	Negative	Negative	0
56	1-3	1-3	Yes	NILM	Non-HPV 16/18	ECC+2	Negative	Negative	Negative	Negative	0
46	1-3	1-3	No	NILM	Non-HPV 16/18	ECC+1	LSIL	Negative	CIN1	LSIL	0
59	1-3	1-3	Yes	LSIL	Non-HPV 16/18	ECC+3	Negative	Negative	Negative	Negative	0
32	1-3	1-3	No	ASC-H/HSIL/AGC	Non-HPV 16/18	ECC+4	Negative	Negative	Negative	Negative	0
57	>3	1-3	Yes	ASCUS	Non-HPV 16/18	ECC+2	Negative	Negative	Negative	Negative	0
54	>3	>3	Yes	NILM	Non-HPV 16/18	ECC+1	Negative	Negative	Negative	Negative	0
57	>3	>3	Yes	ASCUS	Negative	ECC+2	Negative	Negative	Negative	Negative	0
44	>3	1-3	No	NILM	HPV 16/18	ECC+2	Negative	Negative	Negative	Negative	0
32	>3	1-3	No	NILM	HPV 16/18	ECC+3	Negative	Negative	Negative	Negative	0
54	1-3	1-3	Yes	ASCUS	Non-HPV 16/18	ECC+3	LSIL	Negative	CIN1	LSIL	0
46	>3	1-3	No	ASCUS	Negative	ECC+4	Negative	Negative	Negative	Negative	0
38	1-3	1-3	No	NILM	HPV 16/18	ECC+2	LSIL	Negative	CIN1	LSIL	0
56	>3	1-3	Yes	LSIL	Non-HPV 16/18	ECC+3	Negative	Negative	Negative	Negative	0
22	0	0	No	ASCUS	HPV 16/18	ECC+4	Negative	Negative	Negative	Negative	0
56	1-3	1-3	Yes	LSIL	Non-HPV 16/18	ECC+4	LSIL	Negative	CIN1	LSIL	0
43	1-3	1-3	No	ASCUS	HPV 16/18	ECC+3	Negative	Negative	Negative	Negative	0
49	1-3	1-3	No	ASCUS	Non-HPV 16/18	ECC+2	Negative	Negative	Negative	Negative	0
51	1-3	1-3	No	LSIL	Non-HPV 16/18	ECC+2	LSIL	Negative	CIN1	LSIL	0
37	>3	1-3	No	ASCUS	HPV 16/18	ECC+2	Negative	Negative	Negative	Negative	0
49	1-3	1-3	Yes	ASCUS	Non-HPV 16/18	ECC+3	LSIL	Negative	CIN1	LSIL	0
43	>3	1-3	No	ASCUS	Non-HPV 16/18	ECC+2	Negative	Negative	Negative	Negative	0
62	>3	1-3	Yes	NILM	HPV 16/18	ECC+3	Negative	Negative	Negative	Negative	0
41	1-3	1-3	No	ASCUS	Non-HPV 16/18	ECC+2	Negative	Negative	Negative	Negative	0
53	1-3	1-3	Yes	NILM	HPV 16/18	ECC+4	LSIL	Negative	CIN1	LSIL	0
50	>3	1-3	Yes	LSIL	Non-HPV 16/18	ECC+2	Negative	Negative	Negative	Negative	0
57	1-3	1-3	Yes	ASCUS	Non-HPV 16/18	ECC	Negative	Negative	Negative	Negative	0
54	1-3	1-3	Yes	ASC-H/HSIL/AGC	Non-HPV 16/18	ECC+3	LSIL	Negative	CIN1	LSIL	0
28	1-3	1-3	No	NILM	HPV 16/18	ECC		Negative	Negative	Negative	0
35	>3	1-3	No	ASC-H/HSIL/AGC	Non-HPV 16/18	ECC+3	LSIL	HSIL+	CIN2	HSIL+	1
53	1-3	1-3	Yes	NILM	HPV 16/18	ECC+4	Negative	Negative	Negative	Negative	0
62	>3	1-3	Yes	ASCUS	Non-HPV 16/18	ECC+2	LSIL	Negative	CIN1	LSIL	0
57	1-3	1-3	Yes	ASCUS	Non-HPV 16/18	ECC+4	Negative	Negative	Negative	Negative	0
45	1-3	1-3	No	NILM	Non-HPV 16/18	ECC+4	Negative	Negative	Negative	Negative	0
37	1-3	1-3	No	NILM	HPV 16/18	ECC		Negative	Negative	Negative	0
58	>3	1-3	Yes	ASCUS	Non-HPV 16/18	ECC+3	LSIL	Negative	CIN1	LSIL	0
44	1-3	1-3	No	ASCUS	Non-HPV 16/18	ECC+4	Negative	LSIL	CIN1	LSIL	0
37	>3	1-3	No	NILM	HPV 16/18	ECC+2	Negative	Negative	Negative	Negative	0
52	1-3	1-3	Yes	NILM	Non-HPV 16/18	ECC+2	Negative	Negative	Negative	Negative	0
54	1-3	1-3	Yes	ASCUS	Non-HPV 16/18	ECC+1	Negative	Negative	Negative	Negative	0
57	1-3	1-3	Yes	LSIL	Non-HPV 16/18	ECC+2	Negative	Negative	Negative	Negative	0
55	1-3	1-3	Yes	ASCUS	Non-HPV 16/18	ECC+1	Negative	Negative	Negative	Negative	0
58	1-3	1-3	Yes	ASCUS	Non-HPV 16/18	ECC	Negative	Negative	Negative	Negative	0
48	1-3	1-3	Yes	LSIL	Non-HPV 16/18	ECC+2	Negative	Negative	Negative	Negative	0
62	1-3	1-3	Yes	ASCUS	Non-HPV 16/18	ECC+3	Negative	Negative	Negative	Negative	0
28	0	0	No	ASCUS	Negative	ECC+1	Negative	Negative	Negative	Negative	0
46	>3	1-3	No	LSIL	Non-HPV 16/18	ECC+3	Negative	Negative	Negative	Negative	0
48	1-3	1-3	No	LSIL	Non-HPV 16/18	ECC+2	LSIL	Negative	CIN1	LSIL	0
51	>3	1-3	Yes	LSIL	Non-HPV 16/18	ECC+4	LSIL	Negative	CIN1	LSIL	0
54	1-3	1-3	Yes	NILM	Non-HPV 16/18	ECC		Negative	Negative	Negative	0
52	1-3	1-3	Yes	NILM	Non-HPV 16/18	ECC		Negative	Negative	Negative	0
61	>3	1-3	Yes	NILM	Non-HPV 16/18	ECC		Negative	Negative	Negative	0
31	>3	1-3	No	ASCUS	Non-HPV 16/18	ECC+2	Negative	Negative	Negative	Negative	0
51	>3	1-3	Yes	ASCUS	HPV 16/18	ECC+2	Negative	Negative	Negative	Negative	0
22	0	0	No	NILM	HPV 16/18	ECC+4	Negative	Negative	Negative	Negative	0
59	1-3	1-3	Yes	ASCUS	HPV 16/18	ECC+4	Negative	Negative	Negative	Negative	0
56	>3	1-3	Yes	ASCUS	HPV 16/18	ECC+2	Negative	Negative	Negative	Negative	0
55	1-3	1-3	Yes	ASCUS	Non-HPV 16/18	ECC+3	LSIL	Negative	CIN1	LSIL	0
70	1-3	1-3	Yes	ASC-H/HSIL/AGC	Non-HPV 16/18	ECC+4	Negative	Negative	Negative	Negative	0
47	1-3	1-3	No	NILM	HPV 16/18	ECC+4	Negative	Negative	Negative	Negative	0
54	1-3	1-3	Yes	NILM	HPV 16/18	ECC+2	Negative	Negative	Negative	Negative	0
48	1-3	1-3	Yes	NILM	HPV 16/18	ECC	Negative	Negative	Negative	Negative	0
34	1-3	0	No	ASCUS	HPV 16/18	ECC+3	Negative	Negative	Negative	Negative	0
49	1-3	1-3	No	NILM	Non-HPV 16/18	ECC+4	LSIL	Negative	CIN1	LSIL	0
39	1-3	1-3	No	ASCUS	Non-HPV 16/18	ECC+3	LSIL	Negative	CIN1	LSIL	0
53	1-3	1-3	Yes	ASCUS	Negative	ECC+2	Negative	Negative	Negative	Negative	0
56	>3	1-3	Yes	NILM	Non-HPV 16/18	ECC+3	LSIL	Negative	CIN1	LSIL	0
54	1-3	1-3	Yes	ASC-H/HSIL/AGC	HPV 16/18	ECC+2	Negative	Negative	Negative	Negative	0
33	0	0	No	ASCUS	HPV 16/18	ECC+2	Negative	Negative	Negative	Negative	0
51	1-3	1-3	Yes	NILM	HPV 16/18	ECC+2	LSIL	Negative	CIN1	LSIL	0
49	1-3	1-3	No	NILM	HPV 16/18	ECC+1	Negative	Negative	Negative	Negative	0
57	1-3	1-3	Yes	ASCUS	Non-HPV 16/18	ECC+1	Negative	Negative	Negative	Negative	0
46	1-3	1-3	No	NILM	HPV 16/18	ECC+2	LSIL	Negative	CIN1	LSIL	0
45	1-3	1-3	No	ASCUS	HPV 16/18	ECC+3	Negative	Negative	Negative	Negative	0
59	1-3	1-3	Yes	NILM	Non-HPV 16/18	ECC+2	LSIL	Negative	CIN1	LSIL	0
33	1-3	1-3	No	LSIL	Non-HPV 16/18	ECC+2	Negative	Negative	Negative	Negative	0
70	1-3	1-3	Yes	NILM	HPV 16/18	ECC+2	Negative	Negative	Negative	Negative	0
59	>3	1-3	Yes	NILM	Non-HPV 16/18	ECC+3	Negative	Negative	Negative	Negative	0
49	>3	1-3	No	ASCUS	Non-HPV 16/18	ECC+2	Negative	Negative	Negative	Negative	0
54	>3	1-3	Yes	NILM	Non-HPV 16/18	ECC+3	LSIL	Negative	CIN1	LSIL	0
56	>3	1-3	Yes	ASCUS	Non-HPV 16/18	ECC+4	LSIL	Negative	CIN1	LSIL	0
37	1-3	1-3	No	ASCUS	Non-HPV 16/18	ECC+2	Negative	Negative	Negative	Negative	0
44	1-3	1-3	No	LSIL	Non-HPV 16/18	ECC+3	Negative	Negative	Negative	Negative	0
38	>3	1-3	No	LSIL	Non-HPV 16/18	ECC+3	Negative	Negative	Negative	Negative	0
62	>3	1-3	Yes	NILM	Non-HPV 16/18	ECC+2	Negative	Negative	Negative	Negative	0
36	>3	1-3	No	ASCUS	Non-HPV 16/18	ECC+3	Negative	Negative	Negative	Negative	0
45	1-3	1-3	No	ASCUS	Negative	ECC+1	Negative	Negative	Negative	Negative	0
47	1-3	1-3	No	NILM	Non-HPV 16/18	ECC+1	LSIL	Negative	CIN1	LSIL	0
70	>3	1-3	Yes	ASCUS	Non-HPV 16/18	ECC+4	LSIL	Negative	CIN1	LSIL	0
28	1-3	1-3	No	NILM	HPV 16/18	ECC+2	Negative	Negative	Negative	Negative	0
42	>3	1-3	No	ASCUS	HPV 16/18	ECC+4	Negative	HSIL+	CIN3+	HSIL+	1
60	1-3	1-3	Yes	NILM	HPV 16/18	ECC+4	Negative	Negative	Negative	Negative	0
55	>3	1-3	Yes	ASCUS	HPV 16/18	ECC+4	Negative	Negative	Negative	Negative	0
49	1-3	1-3	Yes	LSIL	Non-HPV 16/18	ECC+2	Negative	Negative	Negative	Negative	0
48	>3	1-3	No	NILM	Non-HPV 16/18	ECC+1	Negative	Negative	Negative	Negative	0
54	>3	1-3	Yes	LSIL	Negative	ECC+4	LSIL	Negative	CIN1	LSIL	0
65	>3	1-3	Yes	NILM	Non-HPV 16/18	ECC+4	LSIL	Negative	CIN1	LSIL	0
53	1-3	1-3	Yes	NILM	Non-HPV 16/18	ECC+3	Negative	Negative	Negative	Negative	0
34	1-3	1-3	No	NILM	Non-HPV 16/18	ECC+1	Negative	Negative	Negative	Negative	0
56	>3	1-3	Yes	ASCUS	Non-HPV 16/18	ECC+2	LSIL	Negative	CIN1	LSIL	0
32	1-3	1-3	No	NILM	HPV 16/18	ECC+2	Negative	Negative	Negative	Negative	0
61	1-3	1-3	Yes	NILM	Non-HPV 16/18	ECC+4	Negative	Negative	Negative	Negative	0
50	1-3	1-3	No	LSIL	Non-HPV 16/18	ECC+4	LSIL	Negative	CIN1	LSIL	0
53	1-3	1-3	Yes	ASCUS	Negative	ECC+2	Negative	Negative	Negative	Negative	0
31	0	0	No	LSIL	Negative	ECC+4	Negative	Negative	Negative	Negative	0
62	1-3	1-3	Yes	NILM	Non-HPV 16/18	ECC+2	Negative	LSIL	CIN1	LSIL	0
58	1-3	1-3	Yes	NILM	HPV 16/18	ECC+2	Negative	Negative	Negative	Negative	0
43	>3	1-3	No	ASCUS	Non-HPV 16/18	ECC+3	LSIL	Negative	CIN1	LSIL	0
43	>3	1-3	No	LSIL	HPV 16/18	ECC+2	Negative	Negative	Negative	Negative	0
55	>3	1-3	Yes	ASCUS	Non-HPV 16/18	ECC+3	Negative	Negative	Negative	Negative	0
45	1-3	1-3	No	LSIL	Non-HPV 16/18	ECC+3	LSIL	Negative	CIN1	LSIL	0
60	1-3	1-3	Yes	ASCUS	Negative	ECC+2	LSIL	LSIL	CIN1	LSIL	0
29	0	0	No	NILM	Non-HPV 16/18	ECC+2	Negative	Negative	Negative	Negative	0
49	1-3	1-3	No	LSIL	HPV 16/18	ECC+3	LSIL	Negative	CIN1	LSIL	0
47	>3	1-3	No	ASCUS	Negative	ECC+1	Negative	Negative	Negative	Negative	0
51	>3	1-3	Yes	ASCUS	Non-HPV 16/18	ECC+4	LSIL	Negative	CIN1	LSIL	0
53	>3	1-3	Yes	ASCUS	Non-HPV 16/18	ECC+4	LSIL	Negative	CIN1	LSIL	0
56	1-3	1-3	Yes	NILM	Negative	ECC+2	Negative	Negative	Negative	Negative	0
47	>3	1-3	No	LSIL	Non-HPV 16/18	ECC+4	Negative	Negative	Negative	Negative	0
56	1-3	1-3	Yes	ASCUS	Non-HPV 16/18	ECC+2	Negative	Negative	Negative	Negative	0
42	1-3	1-3	No	LSIL	Non-HPV 16/18	ECC+4	LSIL	Negative	CIN1	LSIL	0
41	>3	1-3	No	NILM	HPV 16/18	ECC+4	Negative	Negative	Negative	Negative	0
58	1-3	1-3	Yes	NILM	Non-HPV 16/18	ECC+4	LSIL	Negative	CIN1	LSIL	0
48	>3	1-3	No	NILM	HPV 16/18	ECC+2	LSIL	Negative	CIN1	LSIL	0
60	1-3	1-3	Yes	NILM	Non-HPV 16/18	ECC		Negative	Negative	Negative	0
30	1-3	1-3	No	LSIL	Non-HPV 16/18	ECC+4	LSIL	Negative	CIN1	LSIL	0
35	1-3	1-3	No	NILM	Negative	ECC+1	Negative	Negative	Negative	Negative	0
30	>3	1-3	No	NILM	HPV 16/18	ECC+2	Negative	LSIL	CIN1	LSIL	0
58	>3	1-3	Yes	NILM	Negative	ECC+4	Negative	Negative	Negative	Negative	0
38	>3	1-3	No	ASCUS	Non-HPV 16/18	ECC+2	Negative	Negative	Negative	Negative	0
59	>3	1-3	Yes	NILM	Non-HPV 16/18	ECC+4	HSIL+	Negative	CIN2	HSIL+	1
53	1-3	1-3	Yes	ASCUS	Negative	ECC+2	Negative	LSIL	CIN1	LSIL	0
30	1-3	1-3	No	ASCUS	Non-HPV 16/18	ECC+1	Negative	Negative	Negative	Negative	0
37	>3	1-3	No	LSIL	Non-HPV 16/18	ECC+4	Negative	Negative	Negative	Negative	0
36	1-3	1-3	No	NILM	Non-HPV 16/18	ECC+3	Negative	Negative	Negative	Negative	0
33	1-3	1-3	No	ASCUS	Non-HPV 16/18	ECC+3	LSIL	Negative	CIN1	LSIL	0
49	>3	1-3	No	LSIL	Non-HPV 16/18	ECC+3	LSIL	Negative	CIN1	LSIL	0
50	>3	1-3	Yes	LSIL	Non-HPV 16/18	ECC+1	Negative	Negative	Negative	Negative	0
37	1-3	1-3	No	NILM	Non-HPV 16/18	ECC+3	Negative	Negative	Negative	Negative	0
54	1-3	1-3	No	ASCUS	Negative	ECC+2	LSIL	Negative	CIN1	LSIL	0
29	1-3	1-3	No	ASCUS	Non-HPV 16/18	ECC+3	Negative	Negative	Negative	Negative	0
50	1-3	1-3	Yes	NILM	Non-HPV 16/18	ECC+3	Negative	LSIL	CIN1	LSIL	0
62	1-3	1-3	Yes	ASCUS	Non-HPV 16/18	ECC+4	Negative	Negative	Negative	Negative	0
36	>3	1-3	No	LSIL	Non-HPV 16/18	ECC+4	LSIL	Negative	CIN1	LSIL	0
55	>3	1-3	Yes	NILM	Non-HPV 16/18	ECC+2	LSIL	Negative	CIN1	LSIL	0
44	>3	1-3	Yes	ASCUS	Non-HPV 16/18	ECC+1	Negative	Negative	Negative	Negative	0
34	>3	1-3	No	LSIL	Non-HPV 16/18	ECC	Negative	LSIL	CIN1	LSIL	0
43	1-3	1-3	No	ASCUS	Non-HPV 16/18	ECC+2	Negative	Negative	Negative	Negative	0
38	>3	1-3	No	NILM	Non-HPV 16/18	ECC+2	HSIL+	Negative	CIN2	HSIL+	1
34	1-3	0	No	ASCUS	HPV 16/18	ECC+2	Negative	Negative	Negative	Negative	0
59	>3	1-3	Yes	NILM	Non-HPV 16/18	ECC+2	Negative	Negative	Negative	Negative	0
58	1-3	1-3	Yes	ASCUS	Non-HPV 16/18	ECC+4	LSIL	Negative	CIN1	LSIL	0
50	1-3	1-3	Yes	NILM	HPV 16/18	ECC+3	Negative	Negative	Negative	Negative	0
43	1-3	1-3	No	ASCUS	Non-HPV 16/18	ECC+4	LSIL	Negative	CIN1	LSIL	0
43	1-3	1-3	No	NILM	HPV 16/18	ECC+4	Negative	Negative	Negative	Negative	0
53	1-3	1-3	Yes	ASCUS	Non-HPV 16/18	ECC+3	Negative	Negative	Negative	Negative	0
55	1-3	1-3	Yes	NILM	HPV 16/18	ECC+2	Negative	Negative	Negative	Negative	0
54	1-3	1-3	No	LSIL	Non-HPV 16/18	ECC+4	LSIL	Negative	CIN1	LSIL	0
52	>3	1-3	No	NILM	HPV 16/18	ECC+2	Negative	Negative	Negative	Negative	0
37	>3	1-3	No	LSIL	HPV 16/18	ECC+4	LSIL	Negative	CIN1	LSIL	0
31	1-3	1-3	No	LSIL	Non-HPV 16/18	ECC+2	Negative	Negative	Negative	Negative	0
33	1-3	1-3	No	NILM	HPV 16/18	ECC+4	Negative	Negative	Negative	Negative	0
62	1-3	1-3	Yes	LSIL	Negative	ECC+3	Negative	Negative	Negative	Negative	0
64	1-3	1-3	Yes	ASCUS	Non-HPV 16/18	ECC+4	HSIL+	Negative	CIN2	HSIL+	1
38	1-3	1-3	No	NILM	Non-HPV 16/18	ECC+4	Negative	LSIL	CIN1	LSIL	0
35	>3	1-3	No	ASCUS	Non-HPV 16/18	ECC+2	Negative	Negative	Negative	Negative	0
49	>3	1-3	Yes	NILM	Non-HPV 16/18	ECC+3	Negative	Negative	Negative	Negative	0
57	1-3	1-3	Yes	NILM	Negative	ECC+4	Negative	Negative	Negative	Negative	0
51	>3	1-3	No	ASCUS	Non-HPV 16/18	ECC+2	Negative	Negative	Negative	Negative	0
24	0	0	No	LSIL	Non-HPV 16/18	ECC+3	LSIL	Negative	CIN1	LSIL	0
35	1-3	1-3	No	NILM	HPV 16/18	ECC+2	Negative	Negative	Negative	Negative	0
54	1-3	1-3	Yes	NILM	HPV 16/18	ECC+2	Negative	HSIL+	CIN2	HSIL+	1
46	1-3	1-3	No	NILM	HPV 16/18	ECC+1	Negative	HSIL+	CIN3+	HSIL+	1
56	>3	1-3	Yes	ASCUS	Non-HPV 16/18	ECC+4	LSIL	Negative	CIN1	LSIL	0
34	>3	1-3	No	LSIL	Non-HPV 16/18	ECC+4	LSIL	Negative	CIN1	LSIL	0
55	>3	1-3	Yes	NILM	HPV 16/18	ECC+3	Negative	Negative	Negative	Negative	0
52	1-3	1-3	Yes	NILM	Non-HPV 16/18	ECC+2	Negative	Negative	Negative	Negative	0
40	>3	1-3	No	ASCUS	Non-HPV 16/18	ECC+2	LSIL	Negative	CIN1	LSIL	0
54	1-3	1-3	Yes	LSIL	Non-HPV 16/18	ECC+4	Negative	Negative	Negative	Negative	0
39	1-3	0	No	NILM	HPV 16/18	ECC+3	LSIL	Negative	CIN1	LSIL	0
51	1-3	1-3	No	ASCUS	Non-HPV 16/18	ECC+2	Negative	Negative	Negative	Negative	0
50	1-3	1-3	No	NILM	Non-HPV 16/18	ECC+3	Negative	Negative	Negative	Negative	0
52	1-3	1-3	Yes	NILM	Non-HPV 16/18	ECC+2	Negative	Negative	Negative	Negative	0
54	>3	1-3	Yes	NILM	HPV 16/18	ECC+3	Negative	Negative	Negative	Negative	0
41	1-3	1-3	No	ASCUS	Non-HPV 16/18	ECC+2	HSIL+	HSIL+	CIN2	HSIL+	1
41	0	0	No	LSIL	Non-HPV 16/18	ECC+3	Negative	Negative	Negative	Negative	0
59	1-3	1-3	Yes	NILM	Non-HPV 16/18	ECC+2	Negative	Negative	Negative	Negative	0
53	1-3	1-3	Yes	ASCUS	Non-HPV 16/18	ECC+2	Negative	Negative	Negative	Negative	0
59	>3	1-3	Yes	ASCUS	Non-HPV 16/18	ECC+4	Negative	Negative	Negative	Negative	0
48	>3	1-3	No	ASCUS	Non-HPV 16/18	ECC+2	Negative	Negative	Negative	Negative	0
54	>3	1-3	Yes	LSIL	Non-HPV 16/18	ECC+2	LSIL	Negative	CIN1	LSIL	0
53	1-3	1-3	Yes	ASCUS	Non-HPV 16/18	ECC+4	Negative	Negative	Negative	Negative	0
32	>3	1-3	No	ASCUS	Non-HPV 16/18	ECC+3	Negative	Negative	Negative	Negative	0
45	1-3	1-3	No	NILM	HPV 16/18	ECC+4	Negative	Negative	Negative	Negative	0
61	1-3	1-3	Yes	NILM	Non-HPV 16/18	ECC+2	Negative	Negative	Negative	Negative	0
39	1-3	1-3	No	LSIL	Non-HPV 16/18	ECC	Negative	Negative	Negative	Negative	0
26	1-3	0	No	ASCUS	Non-HPV 16/18	ECC+4	LSIL	LSIL	CIN1	LSIL	0
31	>3	1-3	No	NILM	HPV 16/18	ECC+2	Negative	Negative	Negative	Negative	0
33	>3	1-3	No	NILM	Non-HPV 16/18	ECC+4	Negative	Negative	Negative	Negative	0
48	1-3	1-3	No	ASCUS	Negative	ECC+1	LSIL	Negative	CIN1	LSIL	0
54	1-3	1-3	Yes	NILM	HPV 16/18	ECC+2	LSIL	Negative	CIN1	LSIL	0
53	>3	1-3	Yes	NILM	Non-HPV 16/18	ECC	Negative	Negative	Negative	Negative	0
53	1-3	1-3	Yes	LSIL	Non-HPV 16/18	ECC+4	LSIL	Negative	CIN1	LSIL	0
43	>3	1-3	No	ASCUS	Non-HPV 16/18	ECC	Negative	Negative	Negative	Negative	0
22	0	0	No	NILM	Non-HPV 16/18	ECC+1	Negative	Negative	Negative	Negative	0
59	1-3	1-3	Yes	LSIL	Non-HPV 16/18	ECC+1	Negative	Negative	Negative	Negative	0
72	1-3	1-3	Yes	NILM	Non-HPV 16/18	ECC+3	Negative	Negative	Negative	Negative	0
21	1-3	1-3	No	NILM	Negative	ECC+1	Negative	Negative	Negative	Negative	0
42	>3	1-3	No	NILM	Non-HPV 16/18	ECC+3	Negative	Negative	Negative	Negative	0
26	0	0	No	LSIL	Non-HPV 16/18	ECC+3	LSIL	Negative	CIN1	LSIL	0
29	1-3	1-3	No	NILM	Non-HPV 16/18	ECC+3	Negative	Negative	Negative	Negative	0
57	1-3	1-3	Yes	NILM	Non-HPV 16/18	ECC+3	LSIL	Negative	CIN1	LSIL	0
47	>3	1-3	No	NILM	Non-HPV 16/18	ECC+4	Negative	Negative	Negative	Negative	0
35	1-3	1-3	No	ASCUS	Non-HPV 16/18	ECC+1	Negative	Negative	Negative	Negative	0
49	1-3	1-3	Yes	NILM	Non-HPV 16/18	ECC+4	LSIL	Negative	CIN1	LSIL	0
40	>3	1-3	No	ASCUS	Non-HPV 16/18	ECC+3	HSIL+	Negative	CIN2	HSIL+	1
66	>3	1-3	Yes	NILM	HPV 16/18	ECC+2	Negative	Negative	Negative	Negative	0
51	>3	1-3	Yes	NILM	Non-HPV 16/18	ECC+2	Negative	Negative	Negative	Negative	0
40	1-3	1-3	No	ASCUS	Non-HPV 16/18	ECC+2	Negative	Negative	Negative	Negative	0
34	1-3	1-3	No	ASCUS	Non-HPV 16/18	ECC+2	LSIL	Negative	CIN1	LSIL	0
61	1-3	1-3	Yes	NILM	Non-HPV 16/18	ECC+1	LSIL	Negative	CIN1	LSIL	0
63	>3	1-3	Yes	ASCUS	Non-HPV 16/18	ECC+3	Negative	Negative	Negative	Negative	0
58	1-3	1-3	Yes	ASCUS	Non-HPV 16/18	ECC+3	Negative	LSIL	CIN1	LSIL	0
42	>3	1-3	No	NILM	HPV 16/18	ECC+3	LSIL	Negative	CIN1	LSIL	0
42	1-3	1-3	No	ASCUS	HPV 16/18	ECC+1	Negative	Negative	Negative	Negative	0
45	1-3	1-3	No	ASCUS	Non-HPV 16/18	ECC+1	Negative	Negative	Negative	Negative	0
49	1-3	1-3	Yes	NILM	Non-HPV 16/18	ECC+2	Negative	Negative	Negative	Negative	0
59	1-3	1-3	Yes	NILM	Non-HPV 16/18	ECC+1	Negative	Negative	Negative	Negative	0
52	>3	1-3	Yes	ASCUS	Non-HPV 16/18	ECC+1	Negative	Negative	Negative	Negative	0
55	1-3	1-3	Yes	LSIL	HPV 16/18	ECC+3	Negative	Negative	Negative	Negative	0
31	1-3	1-3	No	ASCUS	Non-HPV 16/18	ECC+2	Negative	Negative	Negative	Negative	0
46	1-3	1-3	No	ASCUS	HPV 16/18	ECC+2	Negative	Negative	Negative	Negative	0
38	>3	1-3	No	ASCUS	Non-HPV 16/18	ECC+2	Negative	Negative	Negative	Negative	0
42	1-3	1-3	No	ASCUS	Non-HPV 16/18	ECC+2	LSIL	Negative	CIN1	LSIL	0
43	1-3	1-3	No	NILM	HPV 16/18	ECC+2	Negative	Negative	Negative	Negative	0
44	>3	1-3	No	NILM	HPV 16/18	ECC+3	Negative	Negative	Negative	Negative	0
32	>3	1-3	No	NILM	Non-HPV 16/18	ECC+3	Negative	Negative	Negative	Negative	0
52	1-3	1-3	No	LSIL	Non-HPV 16/18	ECC+3	Negative	Negative	Negative	Negative	0
48	1-3	1-3	No	NILM	HPV 16/18	ECC+4	LSIL	Negative	CIN1	LSIL	0
58	1-3	1-3	Yes	NILM	Non-HPV 16/18	ECC	Negative	LSIL	CIN1	LSIL	0
55	1-3	1-3	Yes	ASCUS	Non-HPV 16/18	ECC+2	Negative	Negative	Negative	Negative	0
54	1-3	1-3	Yes	ASCUS	Non-HPV 16/18	ECC+1	LSIL	LSIL	CIN1	LSIL	0
46	>3	1-3	No	ASCUS	Non-HPV 16/18	ECC+4	LSIL	Negative	CIN1	LSIL	0
47	>3	1-3	No	ASCUS	Negative	ECC		Negative	Negative	Negative	0
67	1-3	1-3	Yes	NILM	Non-HPV 16/18	ECC+2	Negative	Negative	Negative	Negative	0
52	1-3	1-3	Yes	NILM	Negative	ECC+2	Negative	Negative	Negative	Negative	0
61	1-3	1-3	Yes	NILM	Negative	ECC+4	Negative	Negative	Negative	Negative	0
56	1-3	1-3	Yes	ASCUS	Non-HPV 16/18	ECC+2	Negative	Negative	Negative	Negative	0
40	1-3	1-3	No	NILM	Non-HPV 16/18	ECC+1	Negative	Negative	Negative	Negative	0
44	>3	1-3	No	ASCUS	Non-HPV 16/18	ECC+2	Negative	Negative	Negative	Negative	0
30	0	0	No	LSIL	HPV 16/18	ECC+2	Negative	Negative	Negative	Negative	0
65	1-3	1-3	Yes	NILM	Non-HPV 16/18	ECC+4	Negative	Negative	Negative	Negative	0
60	>3	1-3	Yes	ASCUS	Non-HPV 16/18	ECC+4	LSIL	LSIL	CIN1	LSIL	0
56	1-3	1-3	Yes	ASCUS	HPV 16/18	ECC+3	LSIL	LSIL	CIN1	LSIL	0
48	>3	1-3	Yes	NILM	Non-HPV 16/18	ECC+1	Negative	Negative	Negative	Negative	0
60	>3	1-3	Yes	LSIL	Negative	ECC+4	Negative	Negative	Negative	Negative	0
31	>3	1-3	No	LSIL	Non-HPV 16/18	ECC+2	LSIL	Negative	CIN1	LSIL	0
45	1-3	1-3	No	LSIL	Non-HPV 16/18	ECC	Negative	Negative	Negative	Negative	0
40	1-3	1-3	No	NILM	Non-HPV 16/18	ECC+4	LSIL	Negative	CIN1	LSIL	0
46	1-3	1-3	No	ASCUS	Non-HPV 16/18	ECC+4	LSIL	Negative	CIN1	LSIL	0
59	>3	1-3	Yes	NILM	HPV 16/18	ECC+3	LSIL	Negative	CIN1	LSIL	0
45	1-3	1-3	No	LSIL	Non-HPV 16/18	ECC+3	Negative	Negative	Negative	Negative	0
40	1-3	1-3	No	NILM	HPV 16/18	ECC+3	Negative	Negative	Negative	Negative	0
30	1-3	1-3	No	ASCUS	Non-HPV 16/18	ECC+1	Negative	Negative	Negative	Negative	0
45	1-3	1-3	Yes	ASCUS	Non-HPV 16/18	ECC+3	Negative	Negative	Negative	Negative	0
50	1-3	1-3	No	LSIL	Non-HPV 16/18	ECC+2	LSIL	HSIL+	CIN2	HSIL+	1
60	1-3	1-3	Yes	ASCUS	Non-HPV 16/18	ECC+1	Negative	Negative	Negative	Negative	0
48	1-3	1-3	No	ASCUS	Negative	ECC+1	Negative	Negative	Negative	Negative	0
56	1-3	1-3	Yes	NILM	Negative	ECC+4	LSIL	Negative	CIN1	LSIL	0
33	1-3	1-3	No	NILM	Non-HPV 16/18	ECC+3	Negative	Negative	Negative	Negative	0
43	1-3	1-3	Yes	ASCUS	Non-HPV 16/18	ECC	Negative	Negative	Negative	Negative	0
30	1-3	1-3	No	ASCUS	Non-HPV 16/18	ECC+2	Negative	LSIL	CIN1	LSIL	0
48	1-3	1-3	Yes	NILM	Non-HPV 16/18	ECC+2	Negative	Negative	Negative	Negative	0
46	>3	1-3	No	ASC-H/HSIL/AGC	Non-HPV 16/18	ECC+2	Negative	Negative	Negative	Negative	0
58	1-3	1-3	Yes	ASCUS	Non-HPV 16/18	ECC+4	Negative	Negative	Negative	Negative	0
40	1-3	1-3	No	LSIL	Non-HPV 16/18	ECC+3	LSIL	Negative	CIN1	LSIL	0
66	1-3	1-3	Yes	NILM	Non-HPV 16/18	ECC+2	HSIL+	Negative	CIN3+	HSIL+	1
53	1-3	1-3	Yes	LSIL	Non-HPV 16/18	ECC+4	Negative	Negative	Negative	Negative	0
71	>3	1-3	Yes	NILM	Non-HPV 16/18	ECC+2	Negative	Negative	Negative	Negative	0
29	0	0	No	ASCUS	Non-HPV 16/18	ECC+2	Negative	Negative	Negative	Negative	0
50	1-3	1-3	No	NILM	Negative	ECC	Negative	Negative	Negative	Negative	0
54	1-3	1-3	Yes	NILM	Non-HPV 16/18	ECC+2	Negative	Negative	Negative	Negative	0
51	>3	1-3	No	NILM	Non-HPV 16/18	ECC+1	LSIL	Negative	CIN1	LSIL	0
70	1-3	1-3	Yes	NILM	Non-HPV 16/18	ECC+2	Negative	HSIL+	CIN2	HSIL+	1
41	1-3	1-3	No	ASCUS	Non-HPV 16/18	ECC+4	Negative	Negative	Negative	Negative	0
30	0	0	No	LSIL	Non-HPV 16/18	ECC+4	Negative	Negative	Negative	Negative	0
29	1-3	0	No	ASCUS	Non-HPV 16/18	ECC+2	Negative	Negative	Negative	Negative	0
50	>3	1-3	No	NILM	HPV 16/18	ECC+1	Negative	Negative	Negative	Negative	0
53	1-3	1-3	Yes	ASCUS	Non-HPV 16/18	ECC+2	Negative	Negative	Negative	Negative	0
40	1-3	1-3	No	NILM	Non-HPV 16/18	ECC+2	Negative	Negative	Negative	Negative	0
57	>3	1-3	Yes	ASCUS	HPV 16/18	ECC+3	Negative	Negative	Negative	Negative	0
43	>3	1-3	No	ASC-H/HSIL/AGC	Non-HPV 16/18	ECC+4	LSIL	Negative	CIN1	LSIL	0
40	>3	1-3	No	ASCUS	Non-HPV 16/18	ECC+2	LSIL	Negative	CIN1	LSIL	0
37	1-3	1-3	No	ASCUS	HPV 16/18	ECC+2	Negative	LSIL	CIN1	LSIL	0
39	1-3	1-3	No	ASC-H/HSIL/AGC	Non-HPV 16/18	ECC+4	HSIL+	HSIL+	CIN2	HSIL+	1
50	1-3	1-3	No	LSIL	Non-HPV 16/18	ECC+2	Negative	Negative	Negative	Negative	0
35	1-3	1-3	No	ASCUS	Non-HPV 16/18	ECC+2	Negative	Negative	Negative	Negative	0
40	>3	1-3	No	NILM	Non-HPV 16/18	ECC+1	Negative	Negative	Negative	Negative	0
25	1-3	1-3	No	ASCUS	HPV 16/18	ECC+4	LSIL	Negative	CIN1	LSIL	0
52	>3	1-3	Yes	NILM	Non-HPV 16/18	ECC+3	Negative	Negative	Negative	Negative	0
50	1-3	1-3	No	NILM	Non-HPV 16/18	ECC+1	Negative	Negative	Negative	Negative	0
40	1-3	1-3	No	NILM	Non-HPV 16/18	ECC+3	Negative	Negative	Negative	Negative	0
48	>3	1-3	Yes	ASCUS	Non-HPV 16/18	ECC+3	LSIL	Negative	CIN1	LSIL	0
59	1-3	1-3	Yes	NILM	HPV 16/18	ECC+4	Negative	Negative	Negative	Negative	0
51	>3	1-3	No	ASC-H/HSIL/AGC	Non-HPV 16/18	ECC+3	LSIL	Negative	CIN1	LSIL	0
68	1-3	1-3	Yes	NILM	Non-HPV 16/18	ECC+2	Negative	Negative	Negative	Negative	0
36	>3	1-3	No	ASCUS	Non-HPV 16/18	ECC+4	LSIL	Negative	CIN1	LSIL	0
49	1-3	1-3	No	NILM	HPV 16/18	ECC+3	LSIL	Negative	CIN1	LSIL	0
35	>3	1-3	No	NILM	HPV 16/18	ECC+3	LSIL	Negative	CIN1	LSIL	0
26	1-3	0	No	LSIL	Non-HPV 16/18	ECC+2	Negative	Negative	Negative	Negative	0
66	1-3	1-3	Yes	ASCUS	HPV 16/18	ECC+4	LSIL	Negative	CIN1	LSIL	0
59	1-3	1-3	Yes	ASCUS	Non-HPV 16/18	ECC+4	Negative	Negative	Negative	Negative	0
50	1-3	1-3	Yes	LSIL	Non-HPV 16/18	ECC+4	Negative	Negative	Negative	Negative	0
56	>3	>3	Yes	ASCUS	Non-HPV 16/18	ECC+3	Negative	Negative	Negative	Negative	0
33	1-3	0	No	NILM	HPV 16/18	ECC+2	Negative	Negative	Negative	Negative	0
52	1-3	1-3	Yes	LSIL	Non-HPV 16/18	ECC+3	Negative	Negative	Negative	Negative	0
54	1-3	1-3	Yes	ASCUS	Non-HPV 16/18	ECC+3	Negative	Negative	Negative	Negative	0
58	1-3	1-3	Yes	NILM	Non-HPV 16/18	ECC+2	LSIL	Negative	CIN1	LSIL	0
51	>3	1-3	Yes	ASCUS	Non-HPV 16/18	ECC+4	Negative	Negative	Negative	Negative	0
64	1-3	1-3	Yes	NILM	HPV 16/18	ECC+2	LSIL	Negative	CIN1	LSIL	0
51	>3	1-3	Yes	NILM	HPV 16/18	ECC+2	Negative	Negative	Negative	Negative	0
49	>3	1-3	No	NILM	Non-HPV 16/18	ECC+2	Negative	Negative	Negative	Negative	0
46	1-3	1-3	No	ASCUS	Non-HPV 16/18	ECC		Negative	Negative	Negative	0
61	1-3	1-3	Yes	ASCUS	Non-HPV 16/18	ECC+2	LSIL	Negative	CIN1	LSIL	0
58	1-3	1-3	Yes	ASCUS	Non-HPV 16/18	ECC+4	Negative	Negative	Negative	Negative	0
32	1-3	1-3	No	ASCUS	Non-HPV 16/18	ECC+2	Negative	Negative	Negative	Negative	0
46	1-3	1-3	No	ASCUS	Non-HPV 16/18	ECC+2	Negative	Negative	Negative	Negative	0
50	>3	1-3	No	NILM	Non-HPV 16/18	ECC+2	Negative	Negative	Negative	Negative	0
58	>3	>3	Yes	NILM	Non-HPV 16/18	ECC+2	LSIL	Negative	CIN1	LSIL	0
50	1-3	1-3	Yes	NILM	Non-HPV 16/18	ECC+2	Negative	Negative	Negative	Negative	0
55	1-3	1-3	Yes	NILM	HPV 16/18	ECC+2	Negative	Negative	Negative	Negative	0
37	1-3	0	No	NILM	HPV 16/18	ECC+1	Negative	Negative	Negative	Negative	0
71	>3	1-3	Yes	NILM	Negative	ECC+3	LSIL	Negative	CIN1	LSIL	0
58	1-3	1-3	Yes	NILM	Non-HPV 16/18	ECC+2	Negative	Negative	Negative	Negative	0
37	>3	1-3	No	LSIL	Negative	ECC+3	Negative	Negative	Negative	Negative	0
48	>3	1-3	Yes	ASCUS	Non-HPV 16/18	ECC+4	Negative	Negative	Negative	Negative	0
55	>3	1-3	Yes	NILM	Non-HPV 16/18	ECC+2	LSIL	Negative	CIN1	LSIL	0
52	1-3	1-3	No	ASCUS	Non-HPV 16/18	ECC+2	Negative	Negative	Negative	Negative	0
65	>3	1-3	Yes	ASCUS	Non-HPV 16/18	ECC+3	LSIL	Negative	CIN1	LSIL	0
48	1-3	1-3	No	LSIL	Non-HPV 16/18	ECC+3	LSIL	LSIL	CIN1	LSIL	0
34	1-3	1-3	Yes	NILM	HPV 16/18	ECC+2	HSIL+	Negative	CIN2	HSIL+	1
53	1-3	1-3	No	ASCUS	Non-HPV 16/18	ECC+3	LSIL	Negative	CIN1	LSIL	0
34	1-3	1-3	No	NILM	Non-HPV 16/18	ECC+2	Negative	Negative	Negative	Negative	0
59	>3	1-3	Yes	ASCUS	Non-HPV 16/18	ECC+2	Negative	Negative	Negative	Negative	0
36	>3	1-3	No	ASC-H/HSIL/AGC	Negative	ECC+3	Negative	Negative	Negative	Negative	0
48	>3	1-3	Yes	LSIL	HPV 16/18	ECC+2	Negative	Negative	Negative	Negative	0
57	1-3	1-3	Yes	ASCUS	Negative	ECC+3	Negative	Negative	Negative	Negative	0
40	>3	1-3	No	ASCUS	Non-HPV 16/18	ECC+2	Negative	Negative	Negative	Negative	0
49	1-3	1-3	No	ASCUS	Non-HPV 16/18	ECC+2	Negative	Negative	Negative	Negative	0
38	0	0	No	LSIL	Non-HPV 16/18	ECC+2	Negative	Negative	Negative	Negative	0
55	1-3	1-3	Yes	ASCUS	Non-HPV 16/18	ECC+2	Negative	Negative	Negative	Negative	0
40	1-3	1-3	No	ASCUS	Non-HPV 16/18	ECC+2	Negative	Negative	Negative	Negative	0
54	>3	1-3	Yes	ASCUS	HPV 16/18	ECC+2	Negative	Negative	Negative	Negative	0
41	>3	1-3	No	NILM	Negative	ECC+2	Negative	Negative	Negative	Negative	0
51	1-3	1-3	No	ASCUS	Non-HPV 16/18	ECC+1	Negative	Negative	Negative	Negative	0
31	1-3	0	No	LSIL	Non-HPV 16/18	ECC+3	LSIL	Negative	CIN1	LSIL	0
52	1-3	1-3	No	LSIL	Non-HPV 16/18	ECC+2	Negative	Negative	Negative	Negative	0
53	1-3	1-3	Yes	ASCUS	Non-HPV 16/18	ECC+2	Negative	Negative	Negative	Negative	0
61	1-3	1-3	Yes	NILM	Non-HPV 16/18	ECC+3	Negative	Negative	Negative	Negative	0
34	0	0	No	ASCUS	Non-HPV 16/18	ECC+3	LSIL	Negative	CIN1	LSIL	0
49	1-3	1-3	No	ASCUS	HPV 16/18	ECC+3	LSIL	Negative	CIN1	LSIL	0
52	>3	1-3	Yes	NILM	HPV 16/18	ECC+4	Negative	Negative	Negative	Negative	0
25	0	0	No	ASCUS	Non-HPV 16/18	ECC+2	Negative	LSIL	CIN1	LSIL	0
38	>3	1-3	No	LSIL	Non-HPV 16/18	ECC+3	Negative	Negative	Negative	Negative	0
52	1-3	1-3	Yes	NILM	HPV 16/18	ECC+2	Negative	Negative	Negative	Negative	0
59	>3	1-3	Yes	NILM	Non-HPV 16/18	ECC+4	Negative	HSIL+	CIN2	HSIL+	1
69	>3	1-3	Yes	NILM	HPV 16/18	ECC+4	LSIL	Negative	CIN1	LSIL	0
40	>3	1-3	No	LSIL	Non-HPV 16/18	ECC+1	Negative	Negative	Negative	Negative	0
35	>3	1-3	No	LSIL	Non-HPV 16/18	ECC+1	Negative	Negative	Negative	Negative	0
54	1-3	1-3	Yes	LSIL	Non-HPV 16/18	ECC+4	Negative	Negative	Negative	Negative	0
32	1-3	1-3	No	NILM	Negative	ECC+2	Negative	Negative	Negative	Negative	0
40	1-3	1-3	No	ASCUS	Non-HPV 16/18	ECC+2	LSIL	Negative	CIN1	LSIL	0
64	>3	1-3	Yes	NILM	HPV 16/18	ECC+4	Negative	Negative	Negative	Negative	0
57	>3	1-3	Yes	ASCUS	Non-HPV 16/18	ECC+4	Negative	Negative	Negative	Negative	0
36	1-3	1-3	No	LSIL	Non-HPV 16/18	ECC+2	Negative	Negative	Negative	Negative	0
49	1-3	1-3	No	ASCUS	Non-HPV 16/18	ECC+4	Negative	Negative	Negative	Negative	0
49	>3	1-3	No	ASCUS	HPV 16/18	ECC+4	HSIL+	HSIL+	CIN2	HSIL+	1
43	>3	1-3	No	ASCUS	Non-HPV 16/18	ECC+4	Negative	Negative	Negative	Negative	0
58	1-3	1-3	Yes	ASCUS	Negative	ECC+1	Negative	Negative	Negative	Negative	0
54	>3	1-3	Yes	LSIL	Non-HPV 16/18	ECC+2	Negative	Negative	Negative	Negative	0
33	1-3	1-3	No	ASCUS	HPV 16/18	ECC+3	Negative	Negative	Negative	Negative	0
59	>3	1-3	Yes	NILM	Non-HPV 16/18	ECC+2	Negative	Negative	Negative	Negative	0
47	>3	1-3	No	NILM	Non-HPV 16/18	ECC+2	Negative	Negative	Negative	Negative	0
65	>3	1-3	Yes	LSIL	Non-HPV 16/18	ECC+2	LSIL	Negative	CIN1	LSIL	0
22	0	0	No	ASCUS	Non-HPV 16/18	ECC+2	Negative	Negative	Negative	Negative	0
42	>3	1-3	No	ASCUS	Non-HPV 16/18	ECC+2	Negative	Negative	Negative	Negative	0
43	1-3	1-3	No	ASCUS	Non-HPV 16/18	ECC+2	LSIL	LSIL	CIN1	LSIL	0
56	>3	1-3	Yes	NILM	Non-HPV 16/18	ECC+2	Negative	Negative	Negative	Negative	0
53	1-3	1-3	Yes	NILM	HPV 16/18	ECC+3	LSIL	Negative	CIN1	LSIL	0
47	>3	1-3	No	ASCUS	HPV 16/18	ECC+2	Negative	Negative	Negative	Negative	0
49	>3	1-3	No	NILM	Negative	ECC+4	Negative	Negative	Negative	Negative	0
30	0	0	No	NILM	HPV 16/18	ECC+4	Negative	Negative	Negative	Negative	0
50	>3	1-3	Yes	LSIL	Non-HPV 16/18	ECC+4	Negative	Negative	Negative	Negative	0
26	0	0	No	NILM	HPV 16/18	ECC+4	HSIL+	Negative	CIN2	HSIL+	1
51	>3	1-3	Yes	LSIL	Negative	ECC	Negative	Negative	Negative	Negative	0
53	1-3	1-3	Yes	ASCUS	Non-HPV 16/18	ECC+4	Negative	Negative	Negative	Negative	0
52	1-3	1-3	Yes	ASCUS	Non-HPV 16/18	ECC+2	Negative	Negative	Negative	Negative	0
51	>3	1-3	No	ASCUS	Non-HPV 16/18	ECC+1	Negative	Negative	Negative	Negative	0
63	>3	1-3	Yes	ASCUS	Non-HPV 16/18	ECC+3	Negative	Negative	Negative	Negative	0
45	1-3	1-3	No	ASCUS	Non-HPV 16/18	ECC+2	Negative	Negative	Negative	Negative	0
56	1-3	1-3	Yes	NILM	Negative	ECC	Negative	Negative	Negative	Negative	0
69	1-3	1-3	Yes	ASCUS	Non-HPV 16/18	ECC+2	LSIL	Negative	CIN1	LSIL	0
40	1-3	1-3	No	ASCUS	HPV 16/18	ECC+4	LSIL	Negative	CIN1	LSIL	0
35	1-3	1-3	No	NILM	Non-HPV 16/18	ECC+3	Negative	Negative	Negative	Negative	0
50	>3	1-3	No	ASC-H/HSIL/AGC	HPV 16/18	ECC+4	HSIL+	HSIL+	CIN3+	HSIL+	1
55	>3	1-3	Yes	NILM	Non-HPV 16/18	ECC+3	Negative	Negative	Negative	Negative	0
63	1-3	1-3	Yes	NILM	Non-HPV 16/18	ECC+2	LSIL	Negative	CIN1	LSIL	0
33	1-3	1-3	No	ASCUS	HPV 16/18	ECC+1	Negative	Negative	Negative	Negative	0
45	1-3	1-3	No	ASCUS	Non-HPV 16/18	ECC	Negative	Negative	Negative	Negative	0
51	>3	1-3	Yes	ASCUS	Non-HPV 16/18	ECC+4	Negative	Negative	Negative	Negative	0
26	1-3	0	No	ASCUS	HPV 16/18	ECC+4	Negative	Negative	Negative	Negative	0
62	1-3	1-3	Yes	NILM	HPV 16/18	ECC+4	Negative	Negative	Negative	Negative	0
57	1-3	1-3	Yes	LSIL	Non-HPV 16/18	ECC+2	LSIL	Negative	CIN1	LSIL	0
53	>3	1-3	Yes	LSIL	Non-HPV 16/18	ECC+3	Negative	Negative	Negative	Negative	0
53	1-3	0	Yes	ASCUS	Non-HPV 16/18	ECC+3	Negative	Negative	Negative	Negative	0
40	1-3	1-3	No	ASC-H/HSIL/AGC	HPV 16/18	ECC+3	HSIL+	Negative	CIN3+	HSIL+	1
48	1-3	1-3	No	ASC-H/HSIL/AGC	Non-HPV 16/18	ECC+3	HSIL+	HSIL+	CIN3+	HSIL+	1
33	0	0	No	ASCUS	HPV 16/18	ECC+1	LSIL	Negative	CIN1	LSIL	0
26	0	0	No	NILM	Non-HPV 16/18	ECC+3	Negative	Negative	Negative	Negative	0
24	0	0	No	LSIL	Negative	ECC	Negative	Negative	Negative	Negative	0
34	1-3	0	No	ASCUS	Non-HPV 16/18	ECC+1	Negative	Negative	Negative	Negative	0
41	1-3	1-3	No	NILM	Non-HPV 16/18	ECC+1	Negative	Negative	Negative	Negative	0
38	1-3	1-3	No	NILM	Non-HPV 16/18	ECC+2	Negative	Negative	Negative	Negative	0
36	0	0	No	LSIL	Non-HPV 16/18	ECC	Negative	Negative	Negative	Negative	0
27	0	0	No	NILM	Negative	ECC+1	Negative	Negative	Negative	Negative	0
54	>3	1-3	Yes	ASCUS	Non-HPV 16/18	ECC		Negative	Negative
48	1-3	1-3	No	ASCUS	Negative	ECC+2	Negative	Negative	Negative	Negative	0
31	>3	1-3	No	NILM	HPV 16/18	ECC+4	Negative	Negative	Negative	Negative	0
54	>3	1-3	Yes	ASCUS	Negative	ECC+2	LSIL	Negative	CIN1	LSIL	0
26	>3	0	No	ASCUS	HPV 16/18	ECC+3	HSIL+	Negative	CIN2	HSIL+	1
35	1-3	0	No	NILM	HPV 16/18	ECC+2	Negative	Negative	Negative	Negative	0
38	>3	0	No	NILM	Non-HPV 16/18	ECC+3	Negative	Negative	Negative	Negative	0
48	1-3	1-3	Yes	ASCUS	Non-HPV 16/18	ECC+2	LSIL	Negative	CIN1	LSIL	0
59	1-3	1-3	Yes	NILM	Non-HPV 16/18	ECC	Negative	Negative	Negative	Negative	0
61	1-3	1-3	Yes	ASCUS	Non-HPV 16/18	ECC+4	LSIL	Negative	CIN1	LSIL	0
35	>3	1-3	No	LSIL	Non-HPV 16/18	ECC+3	Negative	Negative	Negative	Negative	0
36	1-3	1-3	No	ASCUS	Non-HPV 16/18	ECC+3	Negative	Negative	Negative	Negative	0
48	1-3	1-3	No	LSIL	Non-HPV 16/18	ECC+1	Negative	Negative	Negative	Negative	0
42	1-3	1-3	No	ASCUS	Non-HPV 16/18	ECC+2	Negative	Negative	Negative	Negative	0
38	>3	1-3	No	ASCUS	Non-HPV 16/18	ECC+2	Negative	Negative	Negative	Negative	0
64	>3	1-3	Yes	ASCUS	HPV 16/18	ECC+1	LSIL	Negative	CIN1	LSIL	0
54	1-3	1-3	Yes	NILM	Non-HPV 16/18	ECC+2	Negative	Negative	Negative	Negative	0
52	1-3	1-3	No	ASCUS	Non-HPV 16/18	ECC+4	LSIL	Negative	CIN1	LSIL	0
41	>3	1-3	No	ASCUS	HPV 16/18	ECC+3	Negative	Negative	Negative	Negative	0
49	1-3	1-3	No	ASC-H/HSIL/AGC	Non-HPV 16/18	ECC+4	LSIL	Negative	CIN1	LSIL	0
44	>3	1-3	No	ASCUS	HPV 16/18	ECC+2	Negative	LSIL	CIN1	LSIL	0
49	1-3	1-3	No	LSIL	HPV 16/18	ECC+2	LSIL	Negative	CIN1	LSIL	0
37	>3	1-3	No	NILM	Non-HPV 16/18	ECC+2	Negative	Negative	Negative	Negative	0
51	1-3	1-3	Yes	ASCUS	HPV 16/18	ECC+3	Negative	Negative	Negative	Negative	0
52	>3	1-3	Yes	NILM	HPV 16/18	ECC+4	Negative	Negative	Negative	Negative	0
51	>3	1-3	No	NILM	Non-HPV 16/18	ECC+1	LSIL	Negative	CIN1	LSIL	0
52	1-3	1-3	No	ASCUS	Non-HPV 16/18	ECC+4	LSIL	Negative	CIN1	LSIL	0
68	>3	1-3	Yes	NILM	Non-HPV 16/18	ECC+4	Negative	Negative	Negative	Negative	0
54	>3	1-3	No	LSIL	Non-HPV 16/18	ECC+3	Negative	Negative	Negative	Negative	0
55	1-3	1-3	Yes	NILM	Negative	ECC+4	Negative	Negative	Negative	Negative	0
55	1-3	1-3	Yes	ASC-H/HSIL/AGC	Non-HPV 16/18	ECC+4	HSIL+	Negative	CIN2	HSIL+	1
59	>3	1-3	Yes	NILM	Non-HPV 16/18	ECC+4	LSIL	Negative	CIN1	LSIL	0
58	1-3	1-3	Yes	NILM	HPV 16/18	ECC+4	Negative	Negative	Negative	Negative	0
66	1-3	1-3	Yes	NILM	HPV 16/18	ECC+4	Negative	Negative	Negative	Negative	0
40	1-3	1-3	No	LSIL	Non-HPV 16/18	ECC+2	Negative	Negative	Negative	Negative	0
63	>3	1-3	Yes	NILM	Non-HPV 16/18	ECC+2	Negative	Negative	Negative	Negative	0
52	1-3	1-3	Yes	LSIL	Non-HPV 16/18	ECC+2	LSIL	LSIL	CIN1	LSIL	0
32	1-3	1-3	No	NILM	Non-HPV 16/18	ECC+1	Negative	Negative	Negative	Negative	0
59	>3	1-3	Yes	NILM	Non-HPV 16/18	ECC+2	Negative	Negative	Negative	Negative	0
40	1-3	1-3	No	NILM	HPV 16/18	ECC+4	Negative	Negative	Negative	Negative	0
26	1-3	0	No	LSIL	HPV 16/18	ECC+1	Negative	Negative	Negative	Negative	0
55	1-3	1-3	Yes	LSIL	Non-HPV 16/18	ECC+3	LSIL	Negative	CIN1	LSIL	0
49	1-3	1-3	No	ASCUS	Non-HPV 16/18	ECC+2	Negative	Negative	Negative	Negative	0
58	1-3	1-3	Yes	ASCUS	Non-HPV 16/18	ECC+3	LSIL	Negative	CIN1	LSIL	0
45	1-3	0	No	ASC-H/HSIL/AGC	Non-HPV 16/18	ECC+2	LSIL	Negative	CIN1	LSIL	0
58	>3	1-3	Yes	ASCUS	Non-HPV 16/18	ECC+4	LSIL	Negative	CIN1	LSIL	0
31	1-3	1-3	No	NILM	HPV 16/18	ECC+4	Negative	Negative	Negative	Negative	0
40	>3	1-3	No	ASCUS	Non-HPV 16/18	ECC+4	Negative	Negative	Negative	Negative	0
60	>3	1-3	Yes	LSIL	Non-HPV 16/18	ECC+2	LSIL	Negative	CIN1	LSIL	0
32	0	0	No	NILM	Non-HPV 16/18	ECC+3	Negative	Negative	Negative	Negative	0
62	1-3	1-3	Yes	LSIL	Non-HPV 16/18	ECC+2	LSIL	Negative	CIN1	LSIL	0
35	1-3	1-3	No	LSIL	Non-HPV 16/18	ECC+3	Negative	Negative	Negative	Negative	0
52	1-3	1-3	Yes	ASCUS	Negative	ECC+3	LSIL	Negative	CIN1	LSIL	0
33	>3	1-3	No	LSIL	Non-HPV 16/18	ECC+4	Negative	Negative	Negative	Negative	0
53	1-3	1-3	Yes	ASCUS	Non-HPV 16/18	ECC+4	LSIL	Negative	CIN1	LSIL	0
64	>3	1-3	Yes	ASC-H/HSIL/AGC	HPV 16/18	ECC+4	HSIL+	HSIL+	CIN2	HSIL+	1
58	1-3	1-3	Yes	ASC-H/HSIL/AGC	Non-HPV 16/18	ECC+4	LSIL	Negative	CIN1	LSIL	0
57	>3	1-3	Yes	ASCUS	HPV 16/18	ECC+4	HSIL+	Negative	CIN2	HSIL+	1
48	>3	1-3	Yes	NILM	HPV 16/18	ECC	Negative	Negative	Negative	Negative	0
58	1-3	1-3	Yes	NILM	Non-HPV 16/18	ECC+2	Negative	Negative	Negative	Negative	0
58	>3	1-3	Yes	ASCUS	Non-HPV 16/18	ECC+2	Negative	Negative	Negative	Negative	0
58	>3	1-3	Yes	NILM	HPV 16/18	ECC+2	Negative	LSIL	CIN1	LSIL	0
61	1-3	1-3	Yes	NILM	HPV 16/18	ECC+2	Negative	Negative	Negative	Negative	0
63	>3	1-3	Yes	ASCUS	Non-HPV 16/18	ECC+3	Negative	Negative	Negative	Negative	0
51	1-3	1-3	Yes	ASCUS	Non-HPV 16/18	ECC+3	Negative	Negative	Negative	Negative	0
38	1-3	1-3	No	NILM	HPV 16/18	ECC+2	Negative	Negative	Negative	Negative	0
35	1-3	1-3	No	LSIL	Non-HPV 16/18	ECC+2	Negative	Negative	Negative	Negative	0
43	>3	1-3	No	NILM	Non-HPV 16/18	ECC+2	Negative	Negative	Negative	Negative	0
26	0	0	No	ASCUS	Non-HPV 16/18	ECC+2	Negative	Negative	Negative	Negative	0
58	1-3	1-3	Yes	ASCUS	Non-HPV 16/18	ECC+3	Negative	Negative	Negative	Negative	0
49	1-3	1-3	No	NILM	Non-HPV 16/18	ECC+1	Negative	Negative	Negative	Negative	0
44	>3	1-3	No	LSIL	Non-HPV 16/18	ECC+2	Negative	Negative	Negative	Negative	0
57	1-3	1-3	Yes	NILM	Non-HPV 16/18	ECC+1	Negative	Negative	Negative	Negative	0
33	1-3	1-3	No	ASCUS	Non-HPV 16/18	ECC+4	Negative	Negative	Negative	Negative	0
43	>3	1-3	No	ASCUS	Non-HPV 16/18	ECC+4	Negative	Negative	Negative	Negative	0
52	>3	1-3	Yes	NILM	Non-HPV 16/18	ECC+4	Negative	Negative	Negative	Negative	0
47	>3	1-3	No	LSIL	Non-HPV 16/18	ECC+4	Negative	Negative	Negative	Negative	0
59	>3	1-3	Yes	NILM	Non-HPV 16/18	ECC+2	Negative	Negative	Negative	Negative	0
58	1-3	1-3	Yes	NILM	Non-HPV 16/18	ECC+3	Negative	Negative	Negative	Negative	0
26	1-3	0	No	ASCUS	Non-HPV 16/18	ECC+2	Negative	Negative	Negative	Negative	0
53	1-3	1-3	Yes	NILM	HPV 16/18	ECC+3	Negative	Negative	Negative	Negative	0
53	1-3	1-3	Yes	NILM	HPV 16/18	ECC+1	LSIL	Negative	CIN1	LSIL	0
39	>3	1-3	No	NILM	HPV 16/18	ECC+3	Negative	Negative	Negative	Negative	0
49	>3	1-3	Yes	ASCUS	HPV 16/18	ECC+3	Negative	Negative	Negative	Negative	0
48	1-3	1-3	No	NILM	Non-HPV 16/18	ECC	Negative	Negative	Negative	Negative	0
36	1-3	1-3	No	NILM	Non-HPV 16/18	ECC+3	Negative	Negative	Negative	Negative	0
38	>3	1-3	No	NILM	HPV 16/18	ECC+4	LSIL	Negative	CIN1	LSIL	0
20	0	0	No	NILM	Non-HPV 16/18	ECC+4	LSIL	Negative	CIN1	LSIL	0
45	>3	1-3	Yes	ASCUS	HPV 16/18	ECC+4	Negative	Negative	Negative	Negative	0
48	1-3	1-3	Yes	ASC-H/HSIL/AGC	HPV 16/18	ECC+4	Negative	Negative	Negative	Negative	0
61	1-3	1-3	Yes	NILM	Non-HPV 16/18	ECC+2	Negative	Negative	Negative	Negative	0
42	1-3	1-3	No	ASCUS	HPV 16/18	ECC+4	LSIL	Negative	CIN1	LSIL	0
71	1-3	1-3	Yes	ASC-H/HSIL/AGC	HPV 16/18	ECC+3	Negative	Negative	Negative	Negative	0
56	>3	1-3	Yes	NILM	HPV 16/18	ECC+3	LSIL	Negative	CIN1	LSIL	0
64	>3	1-3	Yes	NILM	Non-HPV 16/18	ECC+3	Negative	Negative	Negative	Negative	0
49	>3	1-3	No	ASCUS	Non-HPV 16/18	ECC+2	Negative	Negative	Negative	Negative	0
51	1-3	1-3	Yes	ASCUS	Non-HPV 16/18	ECC+2	Negative	Negative	Negative	Negative	0
48	>3	1-3	No	ASCUS	Non-HPV 16/18	ECC+2	LSIL	Negative	CIN1	LSIL	0
42	1-3	1-3	No	ASCUS	Non-HPV 16/18	ECC+1	Negative	Negative	Negative	Negative	0
58	1-3	1-3	Yes	NILM	Non-HPV 16/18	ECC+2	Negative	Negative	Negative	Negative	0
47	>3	1-3	No	ASC-H/HSIL/AGC	Non-HPV 16/18	ECC+4	HSIL+	HSIL+	CIN2	HSIL+	1
45	>3	1-3	No	ASCUS	Non-HPV 16/18	ECC+1	Negative	Negative	Negative	Negative	0
31	0	0	No	ASCUS	HPV 16/18	ECC+3	LSIL	Negative	CIN1	LSIL	0
43	>3	1-3	No	NILM	Non-HPV 16/18	ECC+1	Negative	Negative	Negative	Negative	0
34	1-3	0	No	LSIL	Negative	ECC+2	Negative	Negative	Negative	Negative	0
33	>3	1-3	No	ASCUS	Non-HPV 16/18	ECC+1	Negative	Negative	Negative	Negative	0
54	1-3	1-3	Yes	NILM	Non-HPV 16/18	ECC+1	LSIL	Negative	CIN1	LSIL	0
34	1-3	1-3	No	ASCUS	Non-HPV 16/18	ECC+2	LSIL	Negative	CIN1	LSIL	0
50	1-3	1-3	No	ASCUS	Non-HPV 16/18	ECC+4	LSIL	Negative	CIN1	LSIL	0
28	1-3	1-3	No	NILM	HPV 16/18	ECC+4	Negative	Negative	Negative	Negative	0
59	1-3	1-3	Yes	NILM	Non-HPV 16/18	ECC	Negative	Negative	Negative	Negative	0
44	1-3	1-3	No	LSIL	Negative	ECC+4	Negative	Negative	Negative	Negative	0
55	1-3	1-3	Yes	NILM	Non-HPV 16/18	ECC+1	Negative	Negative	Negative	Negative	0
33	1-3	1-3	No	ASCUS	Non-HPV 16/18	ECC+2	LSIL	Negative	CIN1	LSIL	0
39	1-3	1-3	No	NILM	HPV 16/18	ECC+1	Negative	Negative	Negative	Negative	0
52	>3	1-3	Yes	LSIL	Non-HPV 16/18	ECC+2	Negative	Negative	Negative	Negative	0
58	1-3	1-3	Yes	LSIL	Non-HPV 16/18	ECC+3	Negative	LSIL	CIN1	LSIL	0
35	>3	1-3	No	NILM	Non-HPV 16/18	ECC+3	LSIL	Negative	CIN1	LSIL	0
53	1-3	1-3	Yes	NILM	Non-HPV 16/18	ECC+3	HSIL+	LSIL	CIN2	HSIL+	1
32	1-3	1-3	No	ASCUS	Non-HPV 16/18	ECC+3	LSIL	Negative	CIN1	LSIL	0
47	1-3	1-3	No	LSIL	Non-HPV 16/18	ECC+2	Negative	Negative	Negative	Negative	0
32	1-3	1-3	No	NILM	HPV 16/18	ECC+2	Negative	Negative	Negative	Negative	0
76	>3	>3	Yes	ASCUS	Non-HPV 16/18	ECC+4	Negative	Negative	Negative	Negative	0
31	>3	1-3	No	ASCUS	Non-HPV 16/18	ECC+2	LSIL	Negative	CIN1	LSIL	0
51	>3	1-3	Yes	LSIL	Non-HPV 16/18	ECC+4	LSIL	Negative	CIN1	LSIL	0
50	1-3	1-3	Yes	LSIL	Non-HPV 16/18	ECC+2	LSIL	Negative	CIN1	LSIL	0
24	0	0	No	ASCUS	HPV 16/18	ECC+2	Negative	Negative	Negative	Negative	0
53	1-3	1-3	No	ASCUS	Non-HPV 16/18	ECC+4	Negative	Negative	Negative	Negative	0
46	>3	0	No	ASCUS	Non-HPV 16/18	ECC+2	Negative	Negative	Negative	Negative	0
40	1-3	1-3	No	ASCUS	Negative	ECC+2	Negative	Negative	Negative	Negative	0
27	1-3	1-3	No	ASCUS	Non-HPV 16/18	ECC+4	Negative	Negative	Negative	Negative	0
41	1-3	1-3	No	ASCUS	HPV 16/18	ECC+4	Negative	Negative	Negative	Negative	0
53	1-3	1-3	Yes	LSIL	HPV 16/18	ECC+4	LSIL	Negative	CIN1	LSIL	0
32	1-3	1-3	No	NILM	HPV 16/18	ECC+4	Negative	Negative	Negative	Negative	0
47	>3	1-3	No	LSIL	Negative	ECC+2	LSIL	Negative	CIN1	LSIL	0
39	1-3	1-3	No	NILM	Non-HPV 16/18	ECC+2	Negative	Negative	Negative	Negative	0
53	1-3	1-3	Yes	NILM	Non-HPV 16/18	ECC+1	Negative	Negative	Negative	Negative	0
48	1-3	1-3	Yes	ASCUS	HPV 16/18	ECC	Negative	Negative	Negative	Negative	0
52	>3	1-3	Yes	LSIL	Negative	ECC+2	LSIL	Negative	CIN1	LSIL	0
59	>3	1-3	Yes	ASCUS	Non-HPV 16/18	ECC+4	Negative	Negative	Negative	Negative	0
53	>3	1-3	Yes	ASCUS	HPV 16/18	ECC+2	Negative	Negative	Negative	Negative	0
54	1-3	1-3	Yes	ASCUS	Non-HPV 16/18	ECC+4	LSIL	Negative	CIN1	LSIL	0
33	1-3	1-3	No	NILM	HPV 16/18	ECC+4	LSIL	Negative	CIN1	LSIL	0
56	>3	1-3	Yes	LSIL	Non-HPV 16/18	ECC+2	Negative	Negative	Negative	Negative	0
47	1-3	1-3	Yes	NILM	HPV 16/18	ECC+2	LSIL	Negative	CIN1	LSIL	0
23	1-3	0	No	ASCUS	Non-HPV 16/18	ECC+1	LSIL	Negative	CIN1	LSIL	0
42	1-3	1-3	No	LSIL	HPV 16/18	ECC+1	LSIL	Negative	CIN1	LSIL	0
54	>3	1-3	Yes	ASCUS	HPV 16/18	ECC+1	LSIL	Negative	CIN1	LSIL	0
31	1-3	0	No	ASCUS	Non-HPV 16/18	ECC+1	Negative	Negative	Negative	Negative	0
66	>3	1-3	Yes	NILM	HPV 16/18	ECC+3	Negative	Negative	Negative	Negative	0
64	>3	1-3	Yes	NILM	Non-HPV 16/18	ECC+2	Negative	Negative	Negative	Negative	0
34	1-3	0	No	NILM	Non-HPV 16/18	ECC+2	Negative	Negative	Negative	Negative	0
52	1-3	1-3	No	NILM	Non-HPV 16/18	ECC+3	Negative	Negative	Negative	Negative	0
42	1-3	1-3	No	ASC-H/HSIL/AGC	Non-HPV 16/18	ECC+4	HSIL+	Negative	CIN2	HSIL+	1
51	1-3	1-3	No	ASC-H/HSIL/AGC	Negative	ECC+4	Negative	Negative	Negative	Negative	0
58	1-3	1-3	Yes	NILM	Non-HPV 16/18	ECC+3	Negative	Negative	Negative	Negative	0
21	1-3	1-3	No	NILM	Non-HPV 16/18	ECC+4	Negative	Negative	Negative	Negative	0
41	1-3	1-3	Yes	NILM	Non-HPV 16/18	ECC+2	Negative	Negative	Negative	Negative	0
40	1-3	1-3	No	ASCUS	Negative	ECC+2	Negative	Negative	Negative	Negative	0
41	1-3	0	No	NILM	HPV 16/18	ECC+1	Negative	Negative	Negative	Negative	0
42	1-3	1-3	No	ASCUS	HPV 16/18	ECC	Negative	Negative	Negative	Negative	0
36	1-3	1-3	No	ASC-H/HSIL/AGC	Non-HPV 16/18	ECC+3	HSIL+	HSIL+	CIN2	HSIL+	1
30	0	0	No	ASCUS	Non-HPV 16/18	ECC+2	Negative	Negative	Negative	Negative	0
63	1-3	1-3	Yes	ASCUS	Negative	ECC+3	Negative	Negative	Negative	Negative	0
42	>3	1-3	No	ASCUS	Non-HPV 16/18	ECC+2	Negative	LSIL	CIN1	LSIL	0
52	1-3	1-3	Yes	ASCUS	Non-HPV 16/18	ECC+2	Negative	Negative	Negative	Negative	0
33	1-3	0	No	ASCUS	Non-HPV 16/18	ECC+2	LSIL	Negative	CIN1	LSIL	0
39	1-3	0	No	LSIL	Non-HPV 16/18	ECC+4	Negative	Negative	Negative	Negative	0
32	1-3	1-3	No	NILM	Non-HPV 16/18	ECC+4	Negative	Negative	Negative	Negative	0
54	1-3	1-3	No	NILM	HPV 16/18	ECC+3	Negative	Negative	Negative	Negative	0
38	>3	1-3	No	LSIL	Non-HPV 16/18	ECC	Negative	Negative	Negative	Negative	0
26	0	0	No	ASCUS	Non-HPV 16/18	ECC+1	Negative	Negative	Negative	Negative	0
53	1-3	1-3	Yes	NILM	Non-HPV 16/18	ECC+4	Negative	Negative	Negative	Negative	0
61	1-3	1-3	Yes	NILM	Non-HPV 16/18	ECC+1	Negative	Negative	Negative	Negative	0
49	>3	1-3	No	LSIL	HPV 16/18	ECC+2	LSIL	Negative	CIN1	LSIL	0
53	>3	1-3	Yes	ASC-H/HSIL/AGC	HPV 16/18	ECC+1	LSIL	Negative	CIN1	LSIL	0
37	1-3	1-3	No	ASCUS	Non-HPV 16/18	ECC	Negative	Negative	Negative	Negative	0
58	1-3	1-3	Yes	NILM	Non-HPV 16/18	ECC+2	Negative	Negative	Negative	Negative	0
46	1-3	1-3	No	NILM	Non-HPV 16/18	ECC	Negative	Negative	Negative	Negative	0
31	1-3	1-3	No	NILM	HPV 16/18	ECC+4	LSIL	Negative	CIN1	LSIL	0
51	1-3	1-3	Yes	ASCUS	Non-HPV 16/18	ECC	Negative	Negative	Negative	Negative	0
48	>3	1-3	No	NILM	Non-HPV 16/18	ECC+1	Negative	Negative	Negative	Negative	0
45	>3	1-3	Yes	ASCUS	Non-HPV 16/18	ECC+1	Negative	Negative	Negative	Negative	0
59	1-3	1-3	Yes	NILM	HPV 16/18	ECC+4	Negative	Negative	Negative	Negative	0
31	1-3	1-3	No	ASCUS	Non-HPV 16/18	ECC+1	Negative	Negative	Negative	Negative	0
51	1-3	1-3	Yes	LSIL	Non-HPV 16/18	ECC+1	Negative	Negative	Negative	Negative	0
35	1-3	0	No	ASCUS	Non-HPV 16/18	ECC+2	Negative	Negative	Negative	Negative	0
26	0	0	No	LSIL	Non-HPV 16/18	ECC+2	Negative	Negative	Negative	Negative	0
37	1-3	1-3	No	ASCUS	Non-HPV 16/18	ECC+3	Negative	Negative	Negative	Negative	0
43	1-3	1-3	No	NILM	Non-HPV 16/18	ECC		Negative	Negative	Negative	0
45	>3	1-3	No	ASC-H/HSIL/AGC	Non-HPV 16/18	ECC+4	Negative	HSIL+	CIN2	HSIL+	1
40	1-3	1-3	No	NILM	HPV 16/18	ECC+3	LSIL	Negative	CIN1	LSIL	0
28	1-3	1-3	No	NILM	Non-HPV 16/18	ECC		Negative	Negative	Negative	0
46	>3	1-3	No	NILM	Negative	ECC		LSIL	Negative	Negative	0
64	1-3	1-3	Yes	NILM	Non-HPV 16/18	ECC	Negative	Negative	Negative	Negative	0
39	1-3	1-3	No	LSIL	Non-HPV 16/18	ECC+4	LSIL	Negative	CIN1	LSIL	0
51	>3	1-3	Yes	ASCUS	Non-HPV 16/18	ECC+4	LSIL	Negative	CIN1	LSIL	0
35	1-3	1-3	No	ASCUS	Non-HPV 16/18	ECC+4	Negative	Negative	Negative	Negative	0
66	1-3	1-3	Yes	NILM	Non-HPV 16/18	ECC+2	Negative	Negative	Negative	Negative	0
67	>3	1-3	Yes	NILM	HPV 16/18	ECC	Negative	LSIL	CIN1	LSIL	0
42	1-3	1-3	No	NILM	Non-HPV 16/18	ECC		HSIL+	CIN2	HSIL+	1
28	1-3	0	No	NILM	HPV 16/18	ECC+3	Negative	Negative	Negative	Negative	0
51	1-3	1-3	Yes	LSIL	Non-HPV 16/18	ECC+2	Negative	Negative	Negative	Negative	0
56	>3	1-3	Yes	ASCUS	Non-HPV 16/18	ECC+2	Negative	Negative	Negative	Negative	0
57	1-3	1-3	Yes	NILM	Non-HPV 16/18	ECC+1	Negative	Negative	Negative	Negative	0
56	1-3	1-3	Yes	NILM	Non-HPV 16/18	ECC+1	Negative	Negative	Negative	Negative	0
42	1-3	1-3	No	LSIL	Non-HPV 16/18	ECC+1	LSIL	Negative	CIN1	LSIL	0
56	1-3	1-3	Yes	NILM	HPV 16/18	ECC+3	LSIL	Negative	CIN1	LSIL	0
52	1-3	1-3	No	LSIL	Non-HPV 16/18	ECC+2	Negative	Negative	Negative	Negative	0
59	>3	1-3	Yes	LSIL	Non-HPV 16/18	ECC+4	Negative	Negative	Negative	Negative	0
54	>3	1-3	Yes	LSIL	Non-HPV 16/18	ECC	Negative	Negative	Negative	Negative	0
57	1-3	1-3	Yes	ASCUS	Non-HPV 16/18	ECC+2	LSIL	Negative	CIN1	LSIL	0
60	>3	1-3	Yes	ASCUS	Non-HPV 16/18	ECC	Negative	Negative	Negative	Negative	0
63	1-3	1-3	Yes	ASC-H/HSIL/AGC	Non-HPV 16/18	ECC+3	Negative	Negative	Negative	Negative	0
46	>3	1-3	No	LSIL	Non-HPV 16/18	ECC+3	LSIL	LSIL	CIN1	LSIL	0
26	0	0	No	ASCUS	Non-HPV 16/18	ECC+2	Negative	Negative	Negative	Negative	0
64	>3	1-3	Yes	NILM	HPV 16/18	ECC+2	Negative	Negative	Negative	Negative	0
45	1-3	1-3	No	ASCUS	Non-HPV 16/18	ECC+1	Negative	Negative	Negative	Negative	0
55	1-3	1-3	Yes	ASCUS	Non-HPV 16/18	ECC+2	Negative	Negative	Negative	Negative	0
59	>3	1-3	Yes	LSIL	HPV 16/18	ECC+4	HSIL+	Negative	CIN3+	HSIL+	1
37	1-3	1-3	No	NILM	Non-HPV 16/18	ECC		Negative	Negative	Negative	0
39	>3	1-3	No	NILM	HPV 16/18	ECC		Negative	Negative	Negative	0
39	>3	1-3	No	ASCUS	Non-HPV 16/18	ECC+2	Negative	Negative	Negative	Negative	0
58	1-3	1-3	Yes	ASCUS	Non-HPV 16/18	ECC+2	Negative	LSIL	CIN1	LSIL	0
59	1-3	1-3	Yes	LSIL	HPV 16/18	ECC+3	LSIL	Negative	CIN1	LSIL	0
31	>3	1-3	No	NILM	HPV 16/18	ECC		Negative	Negative	Negative	0
55	1-3	1-3	Yes	ASCUS	HPV 16/18	ECC+2	LSIL	Negative	CIN1	LSIL	0
37	1-3	1-3	No	NILM	Negative	ECC		Negative	Negative	Negative	0
53	1-3	1-3	Yes	ASCUS	Non-HPV 16/18	ECC+2	LSIL	Negative	CIN1	LSIL	0
42	1-3	1-3	No	LSIL	Non-HPV 16/18	ECC	Negative	Negative	Negative	Negative	0
41	1-3	1-3	No	ASCUS	Non-HPV 16/18	ECC+2	Negative	Negative	Negative	Negative	0
35	>3	1-3	No	NILM	HPV 16/18	ECC+2	Negative	Negative	Negative	Negative	0
34	>3	1-3	No	LSIL	Non-HPV 16/18	ECC+2	LSIL	Negative	CIN1	LSIL	0
73	1-3	1-3	Yes	ASC-H/HSIL/AGC	HPV 16/18	ECC+4	Negative	Negative	Negative	Negative	0
46	>3	1-3	No	LSIL	Non-HPV 16/18	ECC+4	LSIL	Negative	CIN1	LSIL	0
32	>3	1-3	No	LSIL	Non-HPV 16/18	ECC+4	Negative	Negative	Negative	Negative	0
37	>3	1-3	No	NILM	Non-HPV 16/18	ECC+2	Negative	Negative	Negative	Negative	0
41	1-3	1-3	No	NILM	Non-HPV 16/18	ECC+4	LSIL	Negative	CIN1	LSIL	0
31	1-3	1-3	No	NILM	HPV 16/18	ECC+4	LSIL	Negative	CIN1	LSIL	0
51	1-3	1-3	No	NILM	Non-HPV 16/18	ECC+2	Negative	Negative	Negative	Negative	0
33	1-3	1-3	No	LSIL	Non-HPV 16/18	ECC+2	Negative	Negative	Negative	Negative	0
58	1-3	1-3	Yes	LSIL	Negative	ECC	Negative	Negative	Negative	Negative	0
60	>3	1-3	Yes	LSIL	Non-HPV 16/18	ECC+1	Negative	Negative	Negative	Negative	0
51	1-3	1-3	Yes	NILM	Non-HPV 16/18	ECC+3	Negative	Negative	Negative	Negative	0
54	1-3	1-3	Yes	LSIL	Non-HPV 16/18	ECC+3	Negative	Negative	Negative	Negative	0
59	>3	1-3	Yes	ASCUS	Non-HPV 16/18	ECC	Negative	Negative	Negative	Negative	0
56	1-3	1-3	Yes	NILM	HPV 16/18	ECC+1	Negative	Negative	Negative	Negative	0
49	>3	1-3	Yes	ASCUS	Non-HPV 16/18	ECC+1	LSIL	Negative	CIN1	LSIL	0
41	1-3	0	No	LSIL	Non-HPV 16/18	ECC+4	Negative	Negative	Negative	Negative	0
41	1-3	1-3	No	LSIL	Non-HPV 16/18	ECC+4	LSIL	Negative	CIN1	LSIL	0
49	1-3	1-3	Yes	NILM	HPV 16/18	ECC+4	Negative	Negative	Negative	Negative	0
35	>3	0	No	LSIL	Non-HPV 16/18	ECC+4	LSIL	Negative	CIN1	LSIL	0
44	1-3	1-3	No	ASCUS	Non-HPV 16/18	ECC+4	LSIL	Negative	CIN1	LSIL	0
60	>3	1-3	Yes	ASCUS	Non-HPV 16/18	ECC+2	Negative	Negative	Negative	Negative	0
42	1-3	1-3	No	LSIL	Non-HPV 16/18	ECC+4	Negative	Negative	Negative	Negative	0
63	1-3	1-3	Yes	NILM	Negative	ECC+1	Negative	Negative	Negative	Negative	0
37	1-3	1-3	No	LSIL	Non-HPV 16/18	ECC+1	Negative	Negative	Negative	Negative	0
56	>3	1-3	Yes	NILM	Non-HPV 16/18	ECC+1	Negative	Negative	Negative	Negative	0
44	>3	1-3	No	LSIL	Non-HPV 16/18	ECC	Negative	Negative	Negative	Negative	0
33	0	0	No	ASCUS	Non-HPV 16/18	ECC+1	Negative	Negative	Negative	Negative	0
57	1-3	1-3	Yes	NILM	Non-HPV 16/18	ECC+4	Negative	Negative	Negative	Negative	0
53	1-3	1-3	Yes	NILM	HPV 16/18	ECC+4	Negative	Negative	Negative	Negative	0
31	1-3	1-3	No	ASCUS	Non-HPV 16/18	ECC+4	Negative	Negative	Negative	Negative	0
42	>3	1-3	No	ASCUS	Non-HPV 16/18	ECC+4	Negative	Negative	Negative	Negative	0
54	>3	1-3	Yes	LSIL	Non-HPV 16/18	ECC	Negative	Negative	Negative	Negative	0
34	1-3	1-3	No	ASCUS	Non-HPV 16/18	ECC+3	LSIL	Negative	CIN1	LSIL	0
32	1-3	0	No	ASCUS	Non-HPV 16/18	ECC+4	LSIL	Negative	CIN1	LSIL	0
31	1-3	0	No	NILM	HPV 16/18	ECC+2	Negative	Negative	Negative	Negative	0
51	>3	1-3	Yes	ASCUS	Non-HPV 16/18	ECC+1	LSIL	Negative	CIN1	LSIL	0
66	>3	1-3	Yes	ASCUS	Non-HPV 16/18	ECC	Negative	Negative	Negative	Negative	0
47	1-3	1-3	No	ASCUS	Non-HPV 16/18	ECC+2	Negative	Negative	Negative	Negative	0
37	1-3	1-3	No	ASCUS	Non-HPV 16/18	ECC+4	Negative	Negative	Negative	Negative	0
52	>3	1-3	No	NILM	Non-HPV 16/18	ECC+1	Negative	Negative	Negative	Negative	0
56	1-3	1-3	Yes	LSIL	Non-HPV 16/18	ECC+2	Negative	Negative	Negative	Negative	0
47	0	0	No	NILM	Non-HPV 16/18	ECC+4	LSIL	Negative	CIN1	LSIL	0
29	1-3	1-3	No	NILM	HPV 16/18	ECC+2	Negative	Negative	Negative	Negative	0
31	1-3	1-3	No	NILM	HPV 16/18	ECC+4	LSIL	Negative	CIN1	LSIL	0
56	>3	1-3	Yes	LSIL	Non-HPV 16/18	ECC+2	Negative	Negative	Negative	Negative	0
59	0	0	Yes	LSIL	HPV 16/18	ECC+3	LSIL	Negative	CIN1	LSIL	0
31	1-3	1-3	No	LSIL	Non-HPV 16/18	ECC+2	LSIL	Negative	CIN1	LSIL	0
54	1-3	1-3	Yes	ASCUS	Non-HPV 16/18	ECC+2	Negative	Negative	Negative	Negative	0
38	1-3	1-3	No	NILM	HPV 16/18	ECC+4	LSIL	Negative	CIN1	LSIL	0
40	>3	1-3	No	ASCUS	Non-HPV 16/18	ECC+2	Negative	Negative	Negative	Negative	0
30	0	0	No	ASCUS	Non-HPV 16/18	ECC+2	Negative	Negative	Negative	Negative	0
60	1-3	1-3	Yes	NILM	HPV 16/18	ECC+2	Negative	Negative	Negative	Negative	0
44	>3	1-3	No	ASCUS	HPV 16/18	ECC+2	Negative	Negative	Negative	Negative	0
52	>3	1-3	No	NILM	Non-HPV 16/18	ECC+2	Negative	Negative	Negative	Negative	0
59	1-3	1-3	Yes	NILM	HPV 16/18	ECC+2	Negative	HSIL+	CIN3+	HSIL+	1
33	1-3	0	No	ASCUS	Non-HPV 16/18	ECC+2	LSIL	Negative	CIN1	LSIL	0
44	1-3	1-3	No	NILM	HPV 16/18	ECC+4	Negative	Negative	Negative	Negative	0
42	>3	1-3	No	NILM	Non-HPV 16/18	ECC		Negative	Negative	Negative	0
36	>3	1-3	No	ASCUS	Non-HPV 16/18	ECC		Negative	Negative	Negative	0
58	>3	1-3	Yes	ASCUS	Non-HPV 16/18	ECC+2	LSIL	Negative	CIN1	LSIL	0
51	1-3	1-3	No	NILM	Negative	ECC+4	Negative	Negative	Negative	Negative	0
52	1-3	1-3	Yes	ASCUS	Non-HPV 16/18	ECC+2	Negative	Negative	Negative	Negative	0
47	1-3	1-3	No	NILM	HPV 16/18	ECC+3	LSIL	Negative	CIN1	LSIL	0
56	>3	1-3	Yes	ASCUS	Non-HPV 16/18	ECC+3	LSIL	LSIL	CIN1	LSIL	0
30	>3	0	No	ASCUS	Negative	ECC+3	Negative	Negative	Negative	Negative	0
50	>3	1-3	Yes	ASCUS	HPV 16/18	ECC+4	Negative	Negative	Negative	Negative	0
34	1-3	1-3	No	ASCUS	Negative	ECC+1	Negative	Negative	Negative	Negative	0
49	1-3	1-3	No	ASCUS	Non-HPV 16/18	ECC+4	LSIL	Negative	CIN1	LSIL	0
48	1-3	1-3	No	NILM	Negative	ECC+2	Negative	Negative	Negative	Negative	0
53	1-3	1-3	Yes	NILM	Negative	ECC+2	Negative	Negative	Negative	Negative	0
47	1-3	1-3	No	LSIL	Non-HPV 16/18	ECC+4	Negative	Negative	Negative	Negative	0
55	1-3	1-3	Yes	LSIL	Non-HPV 16/18	ECC+4	Negative	Negative	Negative	Negative	0
57	1-3	1-3	Yes	LSIL	Negative	ECC+3	LSIL	Negative	CIN1	LSIL	0
64	1-3	1-3	Yes	NILM	Non-HPV 16/18	ECC	Negative	Negative	Negative	Negative	0
35	>3	1-3	No	NILM	HPV 16/18	ECC+3	LSIL	Negative	CIN1	LSIL	0
59	1-3	1-3	No	NILM	HPV 16/18	ECC+1	Negative	Negative	Negative	Negative	0
59	1-3	1-3	Yes	ASCUS	Non-HPV 16/18	ECC+1	Negative	Negative	Negative	Negative	0
37	1-3	1-3	No	NILM	Non-HPV 16/18	ECC+1	Negative	Negative	Negative	Negative	0
49	1-3	1-3	No	ASCUS	Non-HPV 16/18	ECC+4	Negative	Negative	Negative	Negative	0
54	>3	1-3	Yes	ASCUS	Non-HPV 16/18	ECC+1	Negative	Negative	Negative	Negative	0
46	1-3	1-3	No	ASCUS	Non-HPV 16/18	ECC+2	Negative	Negative	Negative	Negative	0
47	1-3	1-3	Yes	NILM	Non-HPV 16/18	ECC+2	Negative	Negative	Negative	Negative	0
22	0	0	No	NILM	Non-HPV 16/18	ECC+3	Negative	Negative	Negative	Negative	0
33	1-3	1-3	No	ASCUS	HPV 16/18	ECC+2	Negative	Negative	Negative	Negative	0
61	1-3	1-3	Yes	NILM	HPV 16/18	ECC+2	LSIL	Negative	CIN1	LSIL	0
40	1-3	1-3	No	LSIL	Non-HPV 16/18	ECC+2	Negative	Negative	Negative	Negative	0
40	1-3	1-3	No	ASCUS	Non-HPV 16/18	ECC+4	LSIL	Negative	CIN1	LSIL	0
65	1-3	1-3	Yes	ASCUS	Non-HPV 16/18	ECC+1	Negative	Negative	Negative	Negative	0
46	1-3	1-3	No	NILM	Non-HPV 16/18	ECC+2	Negative	Negative	Negative	Negative	0
47	1-3	1-3	No	ASCUS	Non-HPV 16/18	ECC+4	Negative	Negative	Negative	Negative	0
39	>3	1-3	No	ASCUS	Non-HPV 16/18	ECC+4	LSIL	Negative	CIN1	LSIL	0
55	1-3	1-3	Yes	ASCUS	Non-HPV 16/18	ECC+4	Negative	Negative	Negative	Negative	0
26	0	0	No	ASCUS	Non-HPV 16/18	ECC+2	Negative	Negative	Negative	Negative	0
33	1-3	0	No	LSIL	Non-HPV 16/18	ECC+2	LSIL	Negative	CIN1	LSIL	0
59	1-3	1-3	Yes	LSIL	Non-HPV 16/18	ECC+3	Negative	Negative	Negative	Negative	0
49	>3	1-3	Yes	ASCUS	HPV 16/18	ECC+2	LSIL	LSIL	CIN1	LSIL	0
38	>3	1-3	No	NILM	HPV 16/18	ECC		Negative	Negative	Negative	0
44	1-3	1-3	No	NILM	HPV 16/18	ECC+1	Negative	Negative	Negative	Negative	0
42	1-3	1-3	No	ASCUS	Non-HPV 16/18	ECC+2	Negative	Negative	Negative	Negative	0
58	1-3	1-3	Yes	NILM	Non-HPV 16/18	ECC+1	Negative	Negative	Negative	Negative	0
30	>3	1-3	No	LSIL	HPV 16/18	ECC+4	Negative	Negative	Negative	Negative	0
50	1-3	1-3	Yes	LSIL	Non-HPV 16/18	ECC+4	LSIL	LSIL	CIN1	LSIL	0
59	1-3	1-3	Yes	LSIL	Non-HPV 16/18	ECC	Negative	Negative	Negative	Negative	0
46	1-3	1-3	No	NILM	Non-HPV 16/18	ECC	Negative	Negative	Negative	Negative	0
51	>3	1-3	No	NILM	HPV 16/18	ECC+1	Negative	Negative	Negative	Negative	0
47	1-3	1-3	No	NILM	HPV 16/18	ECC+1	Negative	Negative	Negative	Negative	0
31	>3	1-3	No	NILM	HPV 16/18	ECC+2	Negative	Negative	Negative	Negative	0
37	1-3	0	No	ASCUS	Non-HPV 16/18	ECC+2	Negative	Negative	Negative	Negative	0
58	1-3	1-3	Yes	NILM	HPV 16/18	ECC+1	Negative	Negative	Negative	Negative	0
41	1-3	1-3	No	ASC-H/HSIL/AGC	Negative	ECC+2	Negative	Negative	Negative	Negative	0
56	1-3	1-3	Yes	NILM	HPV 16/18	ECC+2	Negative	Negative	Negative	Negative	0
70	1-3	1-3	Yes	ASCUS	Non-HPV 16/18	ECC+1	Negative	LSIL	CIN1	LSIL	0
33	>3	1-3	No	NILM	HPV 16/18	ECC+2	Negative	Negative	Negative	Negative	0
31	1-3	1-3	No	NILM	Negative	ECC+1	Negative	Negative	Negative	Negative	0
51	0	0	No	ASCUS	Non-HPV 16/18	ECC+1	Negative	Negative	Negative	Negative	0
51	>3	1-3	Yes	NILM	HPV 16/18	ECC+3	Negative	Negative	Negative	Negative	0
56	1-3	1-3	Yes	LSIL	HPV 16/18	ECC+2	Negative	Negative	Negative	Negative	0
42	1-3	1-3	No	ASC-H/HSIL/AGC	Non-HPV 16/18	ECC+4	HSIL+	HSIL+	CIN2	HSIL+	1
46	1-3	1-3	No	ASCUS	HPV 16/18	ECC+1	Negative	Negative	Negative	Negative	0
57	1-3	1-3	Yes	NILM	Non-HPV 16/18	ECC+3	HSIL+	Negative	CIN2	HSIL+	1
52	>3	1-3	Yes	LSIL	Non-HPV 16/18	ECC+4	LSIL	Negative	CIN1	LSIL	0
35	1-3	1-3	No	LSIL	HPV 16/18	ECC+4	Negative	Negative	Negative	Negative	0
40	>3	1-3	No	ASCUS	HPV 16/18	ECC+4	Negative	Negative	Negative	Negative	0
57	>3	1-3	Yes	ASCUS	Non-HPV 16/18	ECC+3	Negative	Negative	Negative	Negative	0
46	1-3	1-3	No	NILM	HPV 16/18	ECC+4	Negative	Negative	Negative	Negative	0
44	>3	1-3	No	LSIL	Non-HPV 16/18	ECC+4	Negative	Negative	Negative	Negative	0
56	>3	1-3	Yes	LSIL	Non-HPV 16/18	ECC+4	LSIL	Negative	CIN1	LSIL	0
63	>3	1-3	Yes	NILM	HPV 16/18	ECC+4	Negative	Negative	Negative	Negative	0
55	1-3	1-3	Yes	ASCUS	HPV 16/18	ECC+4	Negative	Negative	Negative	Negative	0
52	>3	>3	No	ASCUS	Non-HPV 16/18	ECC+2	LSIL	Negative	CIN1	LSIL	0
34	>3	1-3	No	LSIL	Non-HPV 16/18	ECC+2	Negative	Negative	Negative	Negative	0
21	0	0	No	NILM	HPV 16/18	ECC+2	Negative	Negative	Negative	Negative	0
57	1-3	1-3	Yes	ASCUS	Non-HPV 16/18	ECC	Negative	Negative	Negative	Negative	0
39	>3	1-3	No	NILM	HPV 16/18	ECC+4	Negative	Negative	Negative	Negative	0
65	>3	>3	Yes	LSIL	Negative	ECC+4	Negative	Negative	Negative	Negative	0
56	1-3	1-3	Yes	ASCUS	Non-HPV 16/18	ECC+3	Negative	Negative	Negative	Negative	0
59	>3	1-3	Yes	ASCUS	Non-HPV 16/18	ECC+4	Negative	Negative	Negative	Negative	0
45	>3	1-3	No	LSIL	Non-HPV 16/18	ECC+3	LSIL	Negative	CIN1	LSIL	0
54	1-3	1-3	Yes	ASCUS	Non-HPV 16/18	ECC+3	Negative	Negative	Negative	Negative	0
52	>3	1-3	No	NILM	Non-HPV 16/18	ECC		Negative	Negative	Negative	0
36	1-3	1-3	No	NILM	Non-HPV 16/18	ECC+2	Negative	Negative	Negative	Negative	0
46	1-3	1-3	No	LSIL	Non-HPV 16/18	ECC		Negative	Negative	Negative	0
55	1-3	1-3	Yes	ASCUS	Non-HPV 16/18	ECC		Negative	Negative	Negative	0
46	1-3	1-3	No	LSIL	Non-HPV 16/18	ECC+1	Negative	Negative	Negative	Negative	0
60	1-3	1-3	Yes	LSIL	Non-HPV 16/18	ECC+2	LSIL	Negative	CIN1	LSIL	0
67	1-3	1-3	Yes	NILM	Non-HPV 16/18	ECC+4	Negative	Negative	Negative	Negative	0
41	1-3	1-3	No	ASCUS	Non-HPV 16/18	ECC+2	LSIL	Negative	CIN1	LSIL	0
36	1-3	1-3	No	NILM	HPV 16/18	ECC+2	Negative	Negative	Negative	Negative	0
38	1-3	1-3	No	ASCUS	Non-HPV 16/18	ECC+1	Negative	Negative	Negative	Negative	0
58	1-3	1-3	Yes	NILM	Non-HPV 16/18	ECC+3	LSIL	Negative	CIN1	LSIL	0
67	1-3	1-3	Yes	LSIL	Non-HPV 16/18	ECC+3	LSIL	Negative	CIN1	LSIL	0
66	>3	>3	Yes	NILM	HPV 16/18	ECC+3	LSIL	Negative	CIN1	LSIL	0
57	1-3	1-3	Yes	NILM	Non-HPV 16/18	ECC+1	Negative	Negative	Negative	Negative	0
32	0	0	No	NILM	HPV 16/18	ECC+2	LSIL	Negative	CIN1	LSIL	0
52	1-3	1-3	Yes	ASCUS	Non-HPV 16/18	ECC+2	HSIL+	Negative	CIN2	HSIL+	1
56	1-3	1-3	Yes	ASCUS	Non-HPV 16/18	ECC+2	LSIL	Negative	CIN1	LSIL	0
58	>3	1-3	Yes	NILM	Non-HPV 16/18	ECC+3	Negative	Negative	Negative	Negative	0
51	1-3	1-3	No	NILM	Non-HPV 16/18	ECC+3	Negative	Negative	Negative	Negative	0
55	1-3	1-3	Yes	ASCUS	Non-HPV 16/18	ECC+2	Negative	Negative	Negative	Negative	0
22	0	0	No	ASCUS	Non-HPV 16/18	ECC+2	Negative	Negative	Negative	Negative	0
39	>3	1-3	No	NILM	Negative	ECC		Negative	Negative	Negative	0
48	>3	1-3	Yes	NILM	HPV 16/18	ECC+4	LSIL	Negative	CIN1	LSIL	0
56	>3	1-3	Yes	ASC-H/HSIL/AGC	Non-HPV 16/18	ECC+3	Negative	Negative	Negative	Negative	0
55	1-3	1-3	Yes	LSIL	Non-HPV 16/18	ECC+4	Negative	Negative	Negative	Negative	0
52	>3	1-3	Yes	ASCUS	Non-HPV 16/18	ECC+1	Negative	Negative	Negative	Negative	0
41	1-3	1-3	No	NILM	HPV 16/18	ECC		Negative	Negative	Negative	0
54	1-3	1-3	Yes	ASCUS	HPV 16/18	ECC		Negative	Negative	Negative	0
57	1-3	1-3	Yes	NILM	HPV 16/18	ECC+3	LSIL	Negative	CIN1	LSIL	0
53	1-3	1-3	Yes	ASCUS	HPV 16/18	ECC+4	Negative	Negative	Negative	Negative	0
47	1-3	1-3	No	NILM	HPV 16/18	ECC+4	LSIL	Negative	CIN1	LSIL	0
33	0	0	No	LSIL	Non-HPV 16/18	ECC+4	LSIL	Negative	CIN1	LSIL	0
39	1-3	1-3	No	NILM	Non-HPV 16/18	ECC		Negative	Negative	Negative	0
61	>3	1-3	Yes	NILM	HPV 16/18	ECC+2	LSIL	Negative	CIN1	LSIL	0
65	>3	1-3	Yes	ASCUS	Non-HPV 16/18	ECC		Negative	Negative	Negative	0
59	1-3	1-3	Yes	NILM	HPV 16/18	ECC+2	Negative	Negative	Negative	Negative	0
33	1-3	1-3	No	NILM	HPV 16/18	ECC+1	Negative	Negative	Negative	Negative	0
53	>3	1-3	Yes	LSIL	Non-HPV 16/18	ECC+2	LSIL	Negative	CIN1	LSIL	0
33	1-3	0	No	LSIL	Non-HPV 16/18	ECC+3	Negative	Negative	Negative	Negative	0
43	1-3	1-3	No	ASCUS	Non-HPV 16/18	ECC	Negative	Negative	Negative	Negative	0
41	>3	1-3	No	ASCUS	Non-HPV 16/18	ECC+1	Negative	Negative	Negative	Negative	0
29	0	0	No	ASCUS	Non-HPV 16/18	ECC+2	Negative	Negative	Negative	Negative	0
53	1-3	1-3	No	ASCUS	HPV 16/18	ECC+1	LSIL	Negative	CIN1	LSIL	0
48	>3	1-3	Yes	ASCUS	Non-HPV 16/18	ECC+3	Negative	Negative	Negative	Negative	0
63	1-3	1-3	Yes	LSIL	Non-HPV 16/18	ECC+4	LSIL	LSIL	CIN1	LSIL	0
23	0	0	No	LSIL	Non-HPV 16/18	ECC+2	Negative	Negative	Negative	Negative	0
51	1-3	1-3	Yes	NILM	Non-HPV 16/18	ECC+4	Negative	Negative	Negative	Negative	0
59	1-3	1-3	Yes	LSIL	Non-HPV 16/18	ECC+3	Negative	Negative	Negative	Negative	0
58	>3	1-3	Yes	NILM	HPV 16/18	ECC+4	Negative	Negative	Negative	Negative	0
47	>3	1-3	No	ASC-H/HSIL/AGC	Non-HPV 16/18	ECC+4	HSIL+	LSIL	CIN3+	HSIL+	1
39	>3	1-3	No	ASCUS	Non-HPV 16/18	ECC+4	Negative	Negative	Negative	Negative	0
36	>3	1-3	No	ASCUS	Non-HPV 16/18	ECC+4	Negative	Negative	Negative	Negative	0
52	>3	1-3	Yes	ASCUS	Non-HPV 16/18	ECC+4	Negative	Negative	Negative	Negative	0
50	>3	1-3	No	ASCUS	Non-HPV 16/18	ECC+4	LSIL	Negative	CIN1	LSIL	0
40	1-3	1-3	No	ASCUS	HPV 16/18	ECC+4	LSIL	Negative	CIN1	LSIL	0
47	>3	1-3	No	ASCUS	Negative	ECC+4	HSIL+	Negative	CIN2	HSIL+	1
34	1-3	1-3	No	ASC-H/HSIL/AGC	Non-HPV 16/18	ECC+3	HSIL+	LSIL	CIN2	HSIL+	1
54	1-3	1-3	Yes	ASCUS	Non-HPV 16/18	ECC+2	LSIL	LSIL	CIN1	LSIL	0
52	1-3	1-3	No	NILM	HPV 16/18	ECC		Negative	Negative	Negative	0
50	>3	1-3	No	ASCUS	Non-HPV 16/18	ECC+2	LSIL	Negative	CIN1	LSIL	0
54	1-3	1-3	Yes	NILM	Non-HPV 16/18	ECC+1	LSIL	Negative	CIN1	LSIL	0
53	1-3	1-3	No	NILM	HPV 16/18	ECC		Negative	Negative	Negative	0
35	>3	1-3	No	NILM	HPV 16/18	ECC+4	LSIL	Negative	CIN1	LSIL	0
52	1-3	1-3	Yes	NILM	HPV 16/18	ECC+4	Negative	Negative	Negative	Negative	0
63	1-3	1-3	Yes	LSIL	Non-HPV 16/18	ECC+4	Negative	Negative	Negative	Negative	0
41	>3	1-3	No	NILM	Negative	ECC+1	Negative	Negative	Negative	Negative	0
57	1-3	1-3	Yes	LSIL	Negative	ECC		Negative	Negative	Negative	0
47	1-3	1-3	No	LSIL	Non-HPV 16/18	ECC+2	Negative	Negative	Negative	Negative	0
38	>3	1-3	No	LSIL	Non-HPV 16/18	ECC+4	LSIL	Negative	CIN1	LSIL	0
34	>3	1-3	No	ASCUS	Non-HPV 16/18	ECC+2	HSIL+	Negative	CIN2	HSIL+	1
27	1-3	1-3	No	NILM	Non-HPV 16/18	ECC+2	Negative	Negative	Negative	Negative	0
42	1-3	1-3	No	LSIL	Non-HPV 16/18	ECC+3	LSIL	Negative	CIN1	LSIL	0
48	1-3	1-3	No	NILM	Non-HPV 16/18	ECC		Negative	Negative	Negative	0
43	1-3	1-3	No	ASC-H/HSIL/AGC	Non-HPV 16/18	ECC+4	LSIL	Negative	CIN1	LSIL	0
58	1-3	1-3	Yes	NILM	HPV 16/18	ECC+4	Negative	Negative	Negative	Negative	0
38	1-3	1-3	No	ASC-H/HSIL/AGC	HPV 16/18	ECC+4	LSIL	Negative	CIN1	LSIL	0
62	1-3	1-3	Yes	ASCUS	Non-HPV 16/18	ECC+1	Negative	Negative	Negative	Negative	0
58	>3	1-3	Yes	NILM	Non-HPV 16/18	ECC+1	Negative	Negative	Negative	Negative	0
32	>3	1-3	No	NILM	Non-HPV 16/18	ECC+2	LSIL	Negative	CIN1	LSIL	0
57	>3	>3	Yes	ASCUS	Non-HPV 16/18	ECC+2	Negative	Negative	Negative	Negative	0
33	1-3	1-3	No	LSIL	Non-HPV 16/18	ECC+2	LSIL	Negative	CIN1	LSIL	0
40	1-3	1-3	No	LSIL	Non-HPV 16/18	ECC+1	Negative	Negative	Negative	Negative	0
58	1-3	1-3	Yes	ASCUS	Non-HPV 16/18	ECC+2	Negative	Negative	Negative	Negative	0
25	1-3	0	No	NILM	HPV 16/18	ECC+2	LSIL	Negative	CIN1	LSIL	0
42	>3	1-3	No	NILM	HPV 16/18	ECC+2	Negative	Negative	Negative	Negative	0
61	1-3	1-3	Yes	ASCUS	Non-HPV 16/18	ECC+2	Negative	Negative	Negative	Negative	0
62	1-3	1-3	Yes	NILM	HPV 16/18	ECC+4	Negative	Negative	Negative	Negative	0
63	>3	1-3	Yes	ASC-H/HSIL/AGC	Negative	ECC+2	Negative	Negative	Negative	Negative	0
56	1-3	1-3	Yes	LSIL	Non-HPV 16/18	ECC+4	LSIL	Negative	CIN1	LSIL	0
35	>3	1-3	No	NILM	HPV 16/18	ECC+2	LSIL	Negative	CIN1	LSIL	0
52	>3	>3	No	NILM	HPV 16/18	ECC+2	LSIL	Negative	CIN1	LSIL	0
39	>3	1-3	No	NILM	HPV 16/18	ECC+1	Negative	Negative	Negative	Negative	0
43	1-3	1-3	No	NILM	Non-HPV 16/18	ECC+2	LSIL	Negative	CIN1	LSIL	0
58	>3	>3	Yes	NILM	Non-HPV 16/18	ECC+4	Negative	Negative	Negative	Negative	0
60	1-3	1-3	Yes	NILM	HPV 16/18	ECC+4	Negative	Negative	Negative	Negative	0
34	1-3	1-3	No	NILM	HPV 16/18	ECC+2	LSIL	Negative	CIN1	LSIL	0
34	0	0	No	NILM	Non-HPV 16/18	ECC+2	Negative	Negative	Negative	Negative	0
26	1-3	0	No	ASCUS	Non-HPV 16/18	ECC+2	Negative	Negative	Negative	Negative	0
31	1-3	1-3	No	LSIL	Non-HPV 16/18	ECC+4	LSIL	Negative	CIN1	LSIL	0
53	1-3	1-3	Yes	ASCUS	HPV 16/18	ECC+4	Negative	Negative	Negative	Negative	0
53	>3	1-3	Yes	ASCUS	Non-HPV 16/18	ECC		Negative	Negative	Negative	0
56	>3	1-3	Yes	ASCUS	Non-HPV 16/18	ECC+2	LSIL	Negative	CIN1	LSIL	0
34	0	0	No	LSIL	Non-HPV 16/18	ECC+4	Negative	Negative	Negative	Negative	0
33	1-3	1-3	No	LSIL	Non-HPV 16/18	ECC+2	Negative	Negative	Negative	Negative	0
53	>3	1-3	Yes	LSIL	Non-HPV 16/18	ECC+2	Negative	Negative	Negative	Negative	0
60	1-3	1-3	Yes	ASC-H/HSIL/AGC	Non-HPV 16/18	ECC+3	LSIL	Negative	CIN1	LSIL	0
33	1-3	1-3	No	ASCUS	Non-HPV 16/18	ECC+2	Negative	Negative	Negative	Negative	0
29	1-3	0	No	NILM	HPV 16/18	ECC+2	LSIL	Negative	CIN1	LSIL	0
68	1-3	1-3	Yes	LSIL	Non-HPV 16/18	ECC+2	Negative	HSIL+	CIN3+	HSIL+	1
49	1-3	1-3	No	NILM	Non-HPV 16/18	ECC+4	LSIL	Negative	CIN1	LSIL	0
37	0	0	No	ASCUS	Non-HPV 16/18	ECC+1	Negative	Negative	Negative	Negative	0
58	1-3	1-3	Yes	NILM	HPV 16/18	ECC+1	Negative	Negative	Negative	Negative	0
57	1-3	1-3	Yes	ASCUS	Non-HPV 16/18	ECC+4	LSIL	Negative	CIN1	LSIL	0
59	>3	1-3	Yes	ASCUS	Non-HPV 16/18	ECC+4	LSIL	Negative	CIN1	LSIL	0
57	1-3	1-3	Yes	ASC-H/HSIL/AGC	Non-HPV 16/18	ECC+4	Negative	HSIL+	CIN2	HSIL+	1
64	1-3	1-3	Yes	ASCUS	Non-HPV 16/18	ECC+1	Negative	Negative	Negative	Negative	0
70	1-3	1-3	Yes	NILM	Non-HPV 16/18	ECC+2	Negative	Negative	Negative	Negative	0
46	1-3	1-3	Yes	NILM	HPV 16/18	ECC+3	LSIL	Negative	CIN1	LSIL	0
54	1-3	1-3	Yes	ASCUS	Non-HPV 16/18	ECC+4	LSIL	Negative	CIN1	LSIL	0
50	1-3	1-3	No	ASCUS	Non-HPV 16/18	ECC+2	LSIL	Negative	CIN1	LSIL	0
52	>3	1-3	Yes	NILM	Non-HPV 16/18	ECC+4	Negative	Negative	Negative	Negative	0
58	>3	1-3	Yes	ASCUS	Non-HPV 16/18	ECC+2	HSIL+	Negative	CIN2	HSIL+	1
33	1-3	1-3	No	ASCUS	HPV 16/18	ECC+2	Negative	Negative	Negative	Negative	0
55	1-3	1-3	Yes	NILM	Non-HPV 16/18	ECC+2	LSIL	Negative	CIN1	LSIL	0
55	1-3	1-3	Yes	ASCUS	Non-HPV 16/18	ECC	Negative	Negative	Negative	Negative	0
32	0	0	No	LSIL	Non-HPV 16/18	ECC+2	Negative	Negative	Negative	Negative	0
52	>3	1-3	Yes	ASCUS	Non-HPV 16/18	ECC+4	LSIL	Negative	CIN1	LSIL	0
39	>3	1-3	No	NILM	Non-HPV 16/18	ECC+2	Negative	LSIL	CIN1	LSIL	0
54	>3	1-3	Yes	NILM	HPV 16/18	ECC		Negative	Negative	Negative	0
54	1-3	1-3	Yes	NILM	HPV 16/18	ECC+3	LSIL	Negative	CIN1	LSIL	0
58	1-3	1-3	Yes	LSIL	Non-HPV 16/18	ECC+3	LSIL	Negative	CIN1	LSIL	0
59	1-3	1-3	Yes	ASC-H/HSIL/AGC	Non-HPV 16/18	ECC+4	Negative	Negative	Negative	Negative	0
36	1-3	1-3	No	NILM	HPV 16/18	ECC+3	Negative	Negative	Negative	Negative	0
44	1-3	1-3	No	ASCUS	Non-HPV 16/18	ECC+2	LSIL	Negative	CIN1	LSIL	0
46	1-3	1-3	Yes	LSIL	HPV 16/18	ECC+4	LSIL	LSIL	CIN1	LSIL	0
43	>3	1-3	No	NILM	HPV 16/18	ECC+2	LSIL	Negative	CIN1	LSIL	0
61	>3	1-3	Yes	ASCUS	Non-HPV 16/18	ECC+2	LSIL	Negative	CIN1	LSIL	0
44	1-3	1-3	No	LSIL	Non-HPV 16/18	ECC+1	Negative	Negative	Negative	Negative	0
45	1-3	1-3	No	LSIL	Non-HPV 16/18	ECC+1	Negative	Negative	Negative	Negative	0
50	1-3	1-3	Yes	NILM	Non-HPV 16/18	ECC+2	LSIL	Negative	CIN1	LSIL	0
49	1-3	1-3	No	LSIL	Non-HPV 16/18	ECC+4	LSIL	Negative	CIN1	LSIL	0
34	1-3	1-3	No	NILM	Non-HPV 16/18	ECC+2	LSIL	Negative	CIN1	LSIL	0
44	1-3	1-3	No	NILM	Non-HPV 16/18	ECC+4	Negative	Negative	Negative	Negative	0
48	1-3	1-3	No	LSIL	Non-HPV 16/18	ECC+3	LSIL	Negative	CIN1	LSIL	0
46	1-3	1-3	No	ASCUS	Negative	ECC+3	Negative	Negative	Negative	Negative	0
45	1-3	1-3	No	NILM	HPV 16/18	ECC+4	Negative	Negative	Negative	Negative	0
63	>3	1-3	Yes	ASC-H/HSIL/AGC	Negative	ECC+3	Negative	Negative	Negative	Negative	0
47	1-3	1-3	No	NILM	Non-HPV 16/18	ECC+1	Negative	Negative	Negative	Negative	0
37	1-3	1-3	No	NILM	HPV 16/18	ECC+1	Negative	Negative	Negative	Negative	0
53	>3	1-3	No	ASCUS	HPV 16/18	ECC+1	Negative	Negative	Negative	Negative	0
42	1-3	1-3	No	NILM	Non-HPV 16/18	ECC+1	Negative	Negative	Negative	Negative	0
67	>3	>3	Yes	ASCUS	Non-HPV 16/18	ECC+3	LSIL	Negative	CIN1	LSIL	0
31	1-3	1-3	No	ASCUS	HPV 16/18	ECC+2	Negative	Negative	Negative	Negative	0
30	>3	1-3	No	ASCUS	Non-HPV 16/18	ECC+1	Negative	Negative	Negative	Negative	0
56	1-3	1-3	Yes	NILM	HPV 16/18	ECC+2	Negative	Negative	Negative	Negative	0
64	1-3	1-3	Yes	LSIL	HPV 16/18	ECC+2	Negative	Negative	Negative	Negative	0
60	1-3	1-3	Yes	NILM	Non-HPV 16/18	ECC+2	LSIL	LSIL	CIN1	LSIL	0
48	>3	1-3	Yes	NILM	HPV 16/18	ECC+1	LSIL	Negative	CIN1	LSIL	0
44	>3	1-3	No	NILM	HPV 16/18	ECC+3	LSIL	Negative	CIN1	LSIL	0
62	1-3	1-3	Yes	NILM	Non-HPV 16/18	ECC+3	Negative	Negative	Negative	Negative	0
35	>3	0	No	ASCUS	Non-HPV 16/18	ECC+4	LSIL	LSIL	CIN1	LSIL	0
58	1-3	1-3	Yes	ASCUS	HPV 16/18	ECC+4	Negative	Negative	Negative	Negative	0
60	1-3	1-3	Yes	NILM	HPV 16/18	ECC+2	Negative	Negative	Negative	Negative	0
60	1-3	1-3	Yes	ASCUS	Non-HPV 16/18	ECC+2	LSIL	Negative	CIN1	LSIL	0
29	0	0	No	LSIL	HPV 16/18	ECC+2	Negative	Negative	Negative	Negative	0
50	1-3	1-3	No	NILM	Non-HPV 16/18	ECC+3	Negative	Negative	Negative	Negative	0
39	1-3	1-3	No	LSIL	Non-HPV 16/18	ECC+4	Negative	Negative	Negative	Negative	0
23	1-3	0	No	NILM	Non-HPV 16/18	ECC+4	LSIL	Negative	CIN1	LSIL	0
50	>3	1-3	Yes	ASCUS	Non-HPV 16/18	ECC+2	Negative	Negative	Negative	Negative	0
35	1-3	1-3	No	ASCUS	Non-HPV 16/18	ECC+4	Negative	Negative	Negative	Negative	0
52	>3	1-3	Yes	LSIL	Non-HPV 16/18	ECC+4	Negative	Negative	Negative	Negative	0
29	1-3	1-3	No	NILM	HPV 16/18	ECC+4	Negative	Negative	Negative	Negative	0
53	1-3	1-3	Yes	NILM	Non-HPV 16/18	ECC+2	LSIL	Negative	CIN1	LSIL	0
40	>3	1-3	No	NILM	Non-HPV 16/18	ECC+4	Negative	Negative	Negative	Negative	0
33	>3	1-3	No	ASCUS	Non-HPV 16/18	ECC+2	LSIL	Negative	CIN1	LSIL	0
51	>3	1-3	No	LSIL	HPV 16/18	ECC+2	LSIL	Negative	CIN1	LSIL	0
35	1-3	1-3	No	ASCUS	Non-HPV 16/18	ECC+4	Negative	Negative	Negative	Negative	0
42	1-3	1-3	No	ASCUS	Non-HPV 16/18	ECC+3	LSIL	Negative	CIN1	LSIL	0
50	>3	1-3	No	NILM	HPV 16/18	ECC+2	LSIL	Negative	CIN1	LSIL	0
26	>3	1-3	No	ASCUS	Non-HPV 16/18	ECC+3	LSIL	Negative	CIN1	LSIL	0
42	>3	1-3	No	LSIL	Non-HPV 16/18	ECC+2	LSIL	Negative	CIN1	LSIL	0
53	1-3	1-3	Yes	LSIL	Non-HPV 16/18	ECC+1	Negative	Negative	Negative	Negative	0
41	>3	1-3	No	LSIL	Non-HPV 16/18	ECC+1	LSIL	LSIL	CIN1	LSIL	0
51	1-3	1-3	No	NILM	HPV 16/18	ECC+3	Negative	Negative	Negative	Negative	0
35	>3	1-3	No	ASCUS	Non-HPV 16/18	ECC+4	Negative	Negative	Negative	Negative	0
58	>3	1-3	Yes	ASCUS	Negative	ECC+2	LSIL	Negative	CIN1	LSIL	0
54	>3	>3	Yes	ASC-H/HSIL/AGC	Non-HPV 16/18	ECC+3	LSIL	HSIL+	CIN2	HSIL+	1
52	1-3	1-3	No	NILM	Non-HPV 16/18	ECC+2	LSIL	HSIL+	CIN3+	HSIL+	1
35	>3	1-3	No	NILM	Non-HPV 16/18	ECC+2	LSIL	Negative	CIN1	LSIL	0
52	>3	1-3	Yes	ASCUS	Non-HPV 16/18	ECC+3	Negative	Negative	Negative	Negative	0
57	1-3	1-3	Yes	ASC-H/HSIL/AGC	HPV 16/18	ECC+4	Negative	Negative	Negative	Negative	0
56	1-3	1-3	Yes	NILM	Non-HPV 16/18	ECC+2	Negative	Negative	Negative	Negative	0
52	>3	1-3	No	NILM	Non-HPV 16/18	ECC+3	Negative	Negative	Negative	Negative	0
32	0	0	No	ASCUS	Non-HPV 16/18	ECC+1	Negative	Negative	Negative	Negative	0
64	1-3	1-3	Yes	ASCUS	Non-HPV 16/18	ECC+3	Negative	Negative	Negative	Negative	0
40	1-3	1-3	No	NILM	Non-HPV 16/18	ECC+2	LSIL	Negative	CIN1	LSIL	0
35	>3	1-3	No	ASCUS	Non-HPV 16/18	ECC+2	Negative	Negative	Negative	Negative	0
40	>3	1-3	No	LSIL	Non-HPV 16/18	ECC+2	LSIL	Negative	CIN1	LSIL	0
58	>3	1-3	No	NILM	HPV 16/18	ECC+2	LSIL	Negative	CIN1	LSIL	0
39	1-3	1-3	No	ASCUS	Non-HPV 16/18	ECC+1	Negative	Negative	Negative	Negative	0
53	1-3	1-3	Yes	ASCUS	Non-HPV 16/18	ECC+4	Negative	Negative	Negative	Negative	0
39	>3	1-3	No	NILM	Non-HPV 16/18	ECC+2	Negative	Negative	Negative	Negative	0
33	1-3	1-3	No	LSIL	Non-HPV 16/18	ECC+4	Negative	Negative	Negative	Negative	0
36	>3	1-3	No	LSIL	Non-HPV 16/18	ECC+2	LSIL	Negative	CIN1	LSIL	0
50	>3	1-3	Yes	NILM	HPV 16/18	ECC+4	LSIL	Negative	CIN1	LSIL	0
43	1-3	1-3	No	LSIL	Non-HPV 16/18	ECC+2	LSIL	Negative	CIN1	LSIL	0
29	1-3	0	No	NILM	HPV 16/18	ECC+2	Negative	Negative	Negative	Negative	0
49	1-3	1-3	Yes	NILM	HPV 16/18	ECC+2	Negative	Negative	Negative	Negative	0
31	1-3	1-3	No	LSIL	Non-HPV 16/18	ECC+4	Negative	Negative	Negative	Negative	0
59	1-3	1-3	Yes	ASCUS	Non-HPV 16/18	ECC+3	LSIL	Negative	CIN1	LSIL	0
61	1-3	1-3	Yes	ASCUS	Non-HPV 16/18	ECC+2	Negative	Negative	Negative	Negative	0
55	0	0	Yes	NILM	HPV 16/18	ECC		Negative	Negative	Negative	0
46	>3	1-3	No	ASCUS	Non-HPV 16/18	ECC+4	LSIL	Negative	CIN1	LSIL	0
61	>3	>3	Yes	ASCUS	Non-HPV 16/18	ECC+4	LSIL	Negative	CIN1	LSIL	0
55	1-3	1-3	Yes	LSIL	Negative	ECC+3	LSIL	Negative	CIN1	LSIL	0
32	1-3	1-3	No	ASCUS	HPV 16/18	ECC+4	LSIL	Negative	CIN1	LSIL	0
51	>3	1-3	Yes	NILM	HPV 16/18	ECC+3	Negative	Negative	Negative	Negative	0
48	1-3	1-3	Yes	LSIL	Non-HPV 16/18	ECC+2	LSIL	Negative	CIN1	LSIL	0
54	>3	1-3	Yes	NILM	Non-HPV 16/18	ECC+2	Negative	Negative	Negative	Negative	0
33	>3	1-3	No	ASCUS	Non-HPV 16/18	ECC+4	Negative	Negative	Negative	Negative	0
29	1-3	0	No	LSIL	Non-HPV 16/18	ECC+4	LSIL	Negative	CIN1	LSIL	0
49	>3	1-3	No	LSIL	Non-HPV 16/18	ECC+1	Negative	Negative	Negative	Negative	0
62	1-3	1-3	Yes	NILM	HPV 16/18	ECC+1	LSIL	LSIL	CIN1	LSIL	0
41	>3	1-3	No	LSIL	Negative	ECC+2	Negative	Negative	Negative	Negative	0
59	1-3	1-3	Yes	ASCUS	Negative	ECC+2	Negative	Negative	Negative	Negative	0
45	>3	1-3	No	NILM	Non-HPV 16/18	ECC+4	Negative	Negative	Negative	Negative	0
52	1-3	1-3	Yes	NILM	Non-HPV 16/18	ECC+4	Negative	Negative	Negative	Negative	0
50	1-3	1-3	No	ASCUS	Non-HPV 16/18	ECC		Negative		Negative	0
23	1-3	0	No	NILM	HPV 16/18	ECC+2	Negative	Negative	Negative	Negative	0
36	>3	1-3	No	LSIL	Non-HPV 16/18	ECC+2	LSIL	Negative	CIN1	LSIL	0
59	1-3	1-3	Yes	LSIL	Non-HPV 16/18	ECC+4	Negative	Negative	Negative	Negative	0
44	1-3	1-3	No	ASC-H/HSIL/AGC	Non-HPV 16/18	ECC+4	HSIL+	HSIL+	CIN3+	HSIL+	1
53	1-3	1-3	Yes	NILM	Non-HPV 16/18	ECC+4	Negative	Negative	Negative	Negative	0
48	>3	1-3	No	NILM	Non-HPV 16/18	ECC+1	LSIL	Negative	CIN1	LSIL	0
50	>3	1-3	No	NILM	Non-HPV 16/18	ECC+4	Negative	Negative	Negative	Negative	0
64	>3	1-3	Yes	LSIL	Non-HPV 16/18	ECC+3	LSIL	Negative	CIN1	LSIL	0
64	1-3	1-3	Yes	ASCUS	HPV 16/18	ECC+3	Negative	Negative	Negative	Negative	0
58	1-3	1-3	Yes	ASCUS	Non-HPV 16/18	ECC+2	Negative	Negative	Negative	Negative	0
61	>3	1-3	Yes	NILM	HPV 16/18	ECC+3	Negative	Negative	Negative	Negative	0
50	>3	1-3	No	NILM	Non-HPV 16/18	ECC+3	Negative	Negative	Negative	Negative	0
59	>3	1-3	Yes	LSIL	Non-HPV 16/18	ECC+1	LSIL	Negative	CIN1	LSIL	0
54	1-3	1-3	Yes	NILM	Non-HPV 16/18	ECC+4	LSIL	Negative	CIN1	LSIL	0
49	1-3	1-3	No	NILM	Non-HPV 16/18	ECC+3	LSIL	Negative	CIN1	LSIL	0
57	1-3	1-3	Yes	ASCUS	Non-HPV 16/18	ECC+1	Negative	Negative	Negative	Negative	0
46	1-3	1-3	Yes	ASCUS	Non-HPV 16/18	ECC+4	Negative	Negative	Negative	Negative	0
54	1-3	1-3	Yes	ASCUS	Non-HPV 16/18	ECC+3	LSIL	Negative	CIN1	LSIL	0
56	1-3	1-3	Yes	LSIL	Non-HPV 16/18	ECC+4	Negative	Negative	Negative	Negative	0
45	1-3	1-3	No	NILM	Non-HPV 16/18	ECC+2	Negative	Negative	Negative	Negative	0
57	1-3	1-3	Yes	ASCUS	Non-HPV 16/18	ECC+3	Negative	Negative	Negative	Negative	0
68	1-3	1-3	Yes	NILM	HPV 16/18	ECC+1	Negative	Negative	Negative	Negative	0
56	>3	1-3	Yes	ASCUS	HPV 16/18	ECC+4	LSIL	Negative	CIN1	LSIL	0
54	1-3	1-3	Yes	ASCUS	HPV 16/18	ECC+2	Negative	Negative	Negative	Negative	0
35	1-3	1-3	No	ASCUS	Non-HPV 16/18	ECC+4	LSIL	Negative	CIN1	LSIL	0
54	1-3	1-3	No	LSIL	Non-HPV 16/18	ECC+4	LSIL	Negative	CIN1	LSIL	0
32	>3	1-3	No	NILM	HPV 16/18	ECC+4	LSIL	Negative	CIN1	LSIL	0
45	>3	1-3	No	ASCUS	Negative	ECC+4	Negative	Negative	Negative	Negative	0
52	>3	1-3	No	ASCUS	Non-HPV 16/18	ECC+4	LSIL	Negative	CIN1	LSIL	0
28	1-3	0	No	LSIL	Non-HPV 16/18	ECC+4	LSIL	Negative	CIN1	LSIL	0
37	>3	1-3	No	ASCUS	Non-HPV 16/18	ECC+4	Negative	Negative	Negative	Negative	0
58	>3	1-3	Yes	ASCUS	Non-HPV 16/18	ECC+4	LSIL	Negative	CIN1	LSIL	0
47	>3	1-3	No	ASCUS	Non-HPV 16/18	ECC+2	LSIL	Negative	CIN1	LSIL	0
60	1-3	1-3	Yes	LSIL	Non-HPV 16/18	ECC+4	LSIL	Negative	CIN1	LSIL	0
51	1-3	1-3	Yes	LSIL	Non-HPV 16/18	ECC+4	Negative	Negative	Negative	Negative	0
24	0	0	No	ASCUS	HPV 16/18	ECC+4	LSIL	Negative	CIN1	LSIL	0
43	>3	1-3	No	ASC-H/HSIL/AGC	HPV 16/18	ECC+4	HSIL+	Negative	CIN3+	HSIL+	1
30	0	0	No	LSIL	Non-HPV 16/18	ECC+2	LSIL	Negative	CIN1	LSIL	0
47	>3	1-3	No	NILM	Non-HPV 16/18	ECC	Negative	Negative	Negative	Negative	0
59	1-3	1-3	Yes	LSIL	Non-HPV 16/18	ECC	Negative	Negative	Negative	Negative	0
47	1-3	1-3	No	NILM	Non-HPV 16/18	ECC+2	Negative	Negative	Negative	Negative	0
30	1-3	1-3	No	LSIL	Non-HPV 16/18	ECC+3	LSIL	Negative	CIN1	LSIL	0
35	1-3	1-3	No	NILM	Non-HPV 16/18	ECC+2	LSIL	Negative	CIN1	LSIL	0
41	1-3	1-3	No	ASCUS	Non-HPV 16/18	ECC+2	Negative	Negative	Negative	Negative	0
53	1-3	1-3	Yes	LSIL	Non-HPV 16/18	ECC+4	LSIL	Negative	CIN1	LSIL	0
60	1-3	1-3	Yes	NILM	HPV 16/18	ECC+4	Negative	Negative	Negative	Negative	0
34	>3	1-3	No	ASCUS	HPV 16/18	ECC+4	LSIL	Negative	CIN1	LSIL	0
52	1-3	1-3	Yes	NILM	HPV 16/18	ECC+1	LSIL	Negative	CIN1	LSIL	0
55	1-3	1-3	Yes	NILM	HPV 16/18	ECC+4	LSIL	Negative	CIN1	LSIL	0
33	1-3	1-3	No	ASCUS	Non-HPV 16/18	ECC+3	LSIL	Negative	CIN1	LSIL	0
48	1-3	1-3	No	LSIL	Non-HPV 16/18	ECC+3	Negative	Negative	Negative	Negative	0
47	>3	1-3	Yes	ASC-H/HSIL/AGC	HPV 16/18	ECC+4	Negative	Negative	Negative	Negative	0
52	>3	>3	Yes	NILM	Negative	ECC+3	LSIL	Negative	CIN1	LSIL	0
33	1-3	1-3	No	ASCUS	Non-HPV 16/18	ECC+2	LSIL	Negative	CIN1	LSIL	0
38	1-3	1-3	No	NILM	HPV 16/18	ECC+2	Negative	Negative	Negative	Negative	0
61	1-3	1-3	Yes	ASCUS	Non-HPV 16/18	ECC+3	LSIL	Negative	CIN1	LSIL	0
46	>3	1-3	No	LSIL	Non-HPV 16/18	ECC+2	HSIL+	Negative	CIN3+	HSIL+	1
61	>3	1-3	Yes	NILM	Non-HPV 16/18	ECC+4	LSIL	Negative	CIN1	LSIL	0
32	0	0	No	NILM	HPV 16/18	ECC+4	Negative	Negative	Negative	Negative	0
49	>3	1-3	Yes	NILM	Non-HPV 16/18	ECC		Negative	Negative	Negative	0
55	1-3	1-3	Yes	NILM	Non-HPV 16/18	ECC+4	LSIL	Negative	CIN1	LSIL	0
49	1-3	1-3	No	NILM	Non-HPV 16/18	ECC+2	Negative	Negative	Negative	Negative	0
42	>3	1-3	No	NILM	Non-HPV 16/18	ECC+3	Negative	Negative	Negative	Negative	0
55	1-3	1-3	Yes	LSIL	Non-HPV 16/18	ECC+2	LSIL	Negative	CIN1	LSIL	0
54	1-3	1-3	Yes	LSIL	HPV 16/18	ECC+3	HSIL+	Negative	CIN2	HSIL+	1
43	>3	1-3	No	NILM	HPV 16/18	ECC+4	Negative	Negative	Negative	Negative	0
65	1-3	1-3	Yes	ASCUS	HPV 16/18	ECC+4	Negative	Negative	Negative	Negative	0
38	1-3	1-3	No	LSIL	Non-HPV 16/18	ECC+4	Negative	Negative	Negative	Negative	0
55	1-3	1-3	Yes	ASCUS	Non-HPV 16/18	ECC+4	Negative	Negative	Negative	Negative	0
47	>3	1-3	No	NILM	Negative	ECC+2	Negative	Negative	Negative	Negative	0
39	>3	1-3	No	ASCUS	Non-HPV 16/18	ECC+3	LSIL	LSIL	CIN1	LSIL	0
43	1-3	1-3	No	NILM	Non-HPV 16/18	ECC		Negative	Negative	Negative	0
55	1-3	1-3	Yes	ASC-H/HSIL/AGC	Non-HPV 16/18	ECC+3	Negative	Negative	Negative	Negative	0
62	1-3	1-3	Yes	ASCUS	HPV 16/18	ECC+2	Negative	Negative	Negative	Negative	0
62	>3	1-3	Yes	NILM	Non-HPV 16/18	ECC+4	LSIL	Negative	CIN1	LSIL	0
41	1-3	1-3	No	LSIL	Non-HPV 16/18	ECC+2	Negative	Negative	Negative	Negative	0
54	1-3	1-3	Yes	NILM	Non-HPV 16/18	ECC+4	Negative	Negative	Negative	Negative	0
49	1-3	1-3	No	ASCUS	Negative	ECC		Negative	Negative	Negative	0
51	1-3	1-3	No	ASCUS	Non-HPV 16/18	ECC+4	Negative	Negative	Negative	Negative	0
55	>3	1-3	Yes	NILM	Non-HPV 16/18	ECC+3	LSIL	Negative	CIN1	LSIL	0
52	>3	1-3	No	ASCUS	Non-HPV 16/18	ECC+2	Negative	Negative	Negative	Negative	0
46	>3	1-3	No	LSIL	Non-HPV 16/18	ECC	Negative	Negative	Negative	Negative	0
41	1-3	1-3	No	ASCUS	Non-HPV 16/18	ECC+3	LSIL	Negative	CIN1	LSIL	0
54	1-3	1-3	Yes	NILM	Non-HPV 16/18	ECC+4	LSIL	LSIL	CIN1	LSIL	0
29	1-3	1-3	No	LSIL	Negative	ECC+2	Negative	Negative	Negative	Negative	0
25	0	0	No	NILM	Non-HPV 16/18	ECC+2	Negative	Negative	Negative	Negative	0
43	>3	1-3	No	NILM	Non-HPV 16/18	ECC+4	LSIL	Negative	CIN1	LSIL	0
62	>3	1-3	Yes	NILM	Non-HPV 16/18	ECC+2	Negative	Negative	Negative	Negative	0
35	1-3	1-3	No	ASCUS	Non-HPV 16/18	ECC+2	Negative	Negative	Negative	Negative	0
49	>3	1-3	No	ASCUS	Non-HPV 16/18	ECC+4	Negative	Negative	Negative	Negative	0
24	0	0	No	NILM	Non-HPV 16/18	ECC+1	Negative	Negative	Negative	Negative	0
35	>3	1-3	No	NILM	HPV 16/18	ECC+2	Negative	Negative	Negative	Negative	0
64	1-3	1-3	Yes	ASC-H/HSIL/AGC	Negative	ECC+4	Negative	Negative	Negative	Negative	0
54	1-3	1-3	Yes	ASCUS	Non-HPV 16/18	ECC+3	LSIL	Negative	CIN1	LSIL	0
35	1-3	1-3	No	NILM	Non-HPV 16/18	ECC+1	Negative	Negative	Negative	Negative	0
37	1-3	1-3	No	ASCUS	Non-HPV 16/18	ECC+3	LSIL	Negative	CIN1	LSIL	0
24	1-3	0	No	NILM	Non-HPV 16/18	ECC+1	Negative	Negative	Negative	Negative	0
32	>3	1-3	No	ASCUS	Non-HPV 16/18	ECC	Negative	Negative	Negative	Negative	0
39	>3	1-3	No	NILM	Non-HPV 16/18	ECC+2	LSIL	Negative	CIN1	LSIL	0
54	1-3	1-3	Yes	NILM	Non-HPV 16/18	ECC+4	LSIL	Negative	CIN1	LSIL	0
62	>3	>3	Yes	NILM	Non-HPV 16/18	ECC+3	Negative	Negative	Negative	Negative	0
42	1-3	1-3	No	ASCUS	Non-HPV 16/18	ECC+2	Negative	Negative	Negative	Negative	0
54	1-3	1-3	Yes	NILM	HPV 16/18	ECC+4	LSIL	Negative	CIN1	LSIL	0
56	1-3	1-3	Yes	LSIL	Non-HPV 16/18	ECC+4	LSIL	Negative	CIN1	LSIL	0
41	1-3	1-3	No	NILM	HPV 16/18	ECC+4	LSIL	Negative	CIN1	LSIL	0
46	>3	1-3	No	ASCUS	Non-HPV 16/18	ECC+4	LSIL	Negative	CIN1	LSIL	0
32	1-3	1-3	No	NILM	HPV 16/18	ECC+4	Negative	Negative	Negative	Negative	0
47	>3	1-3	No	NILM	Non-HPV 16/18	ECC+2	Negative	Negative	Negative	Negative	0
58	>3	1-3	Yes	NILM	HPV 16/18	ECC+4	LSIL	Negative	CIN1	LSIL	0
39	>3	1-3	No	NILM	Non-HPV 16/18	ECC+4	Negative	Negative	Negative	Negative	0
36	0	0	No	ASCUS	Non-HPV 16/18	ECC+4	Negative	Negative	Negative	Negative	0
53	1-3	1-3	No	NILM	HPV 16/18	ECC+4	Negative	Negative	Negative	Negative	0
36	>3	1-3	No	NILM	HPV 16/18	ECC+4	Negative	Negative	Negative	Negative	0
56	1-3	1-3	Yes	NILM	Non-HPV 16/18	ECC+1	Negative	Negative	Negative	Negative	0
58	>3	1-3	Yes	NILM	Non-HPV 16/18	ECC+1	LSIL	Negative	CIN1	LSIL	0
[truncated: 2,649 more rows]
