# Supplementary material for: Retrospective analysis of cervical screening abnormalities in women with type 3 transformation zone without visible lesions
Source: PeerJ. 2025 Nov 27;13:e20396. doi: 10.7717/peerj.20396 (PMC12665263; doi:10.7717/peerj.20396)
Supplement: Supplemental Information 3 [file peerj-13-20396-s003.xlsx]

## Sheet: Sheet1
Age(year)	Gravidity	Parity	Menopause	TCT	HPV	ECC+Multiple Biopsies	Biopsies	ECC	HSIL+ yield by ECC alone	Histologic Diagnosis	Histology	HSIL+ yield by Biopsies / ECC	HSIL+ yield both by Biopsies and ECC	Additional HSIL+ yield by biopies
23	1-3	0	No	ASC-H/HSIL/AGC	HPV 16/18	ECC+2	Negative	Negative	0	Negative	Negative	0	0	0
29	0	0	No	ASC-H/HSIL/AGC	Negative	ECC		Negative	0	Negative	Negative	0	0	0
31	1-3	1-3	No	ASC-H/HSIL/AGC	Negative	ECC+3	Negative	Negative	0	Negative	Negative	0	0	0
32	>3	1-3	No	ASC-H/HSIL/AGC	HPV 16/18	ECC+2	Negative	Negative	0	Negative	Negative	0	0	0
32	1-3	1-3	No	ASC-H/HSIL/AGC	Non-HPV 16/18	ECC+4	Negative	Negative	0	Negative	Negative	0	0	0
34	1-3	1-3	No	ASC-H/HSIL/AGC	HPV 16/18	ECC+4	HSIL+	HSIL+	0	CIN2	HSIL+	1	1	0
34	1-3	1-3	No	ASC-H/HSIL/AGC	Non-HPV 16/18	ECC+3	HSIL+	LSIL	0	CIN2	HSIL+	1	0	1
34	>3	1-3	No	ASC-H/HSIL/AGC	Non-HPV 16/18	ECC+2	Negative	LSIL	0	CIN1	LSIL	0	0	0
34	1-3	1-3	No	ASC-H/HSIL/AGC	HPV 16/18	ECC+4	LSIL	Negative	0	CIN1	LSIL	0	0	0
34	1-3	1-3	No	ASC-H/HSIL/AGC	Non-HPV 16/18	ECC+4	LSIL	Negative	0	CIN1	LSIL	0	0	0
35	>3	1-3	No	ASC-H/HSIL/AGC	Non-HPV 16/18	ECC+3	LSIL	HSIL+	1	CIN2	HSIL+	1	0	0
35	1-3	1-3	No	ASC-H/HSIL/AGC	HPV 16/18	ECC+4	Negative	Negative	0	Negative	Negative	0	0	0
35	1-3	1-3	No	ASC-H/HSIL/AGC	HPV 16/18	ECC+4	Negative	Negative	0	Negative	Negative	0	0	0
36	1-3	1-3	No	ASC-H/HSIL/AGC	Non-HPV 16/18	ECC+3	HSIL+	HSIL+	0	CIN2	HSIL+	1	1	0
36	>3	1-3	No	ASC-H/HSIL/AGC	Non-HPV 16/18	ECC+2	Negative	LSIL	0	CIN1	LSIL	0	0	0
36	>3	1-3	No	ASC-H/HSIL/AGC	Negative	ECC+3	Negative	Negative	0	Negative	Negative	0	0	0
37	1-3	1-3	No	ASC-H/HSIL/AGC	Non-HPV 16/18	ECC+4	HSIL+	HSIL+	0	CIN3+	HSIL+	1	1	0
37	1-3	0	No	ASC-H/HSIL/AGC	Non-HPV 16/18	ECC+3	HSIL+	LSIL	0	CIN2	HSIL+	1	0	1
37	1-3	1-3	No	ASC-H/HSIL/AGC	Non-HPV 16/18	ECC+2	LSIL	LSIL	0	CIN1	LSIL	0	0	0
37	1-3	1-3	No	ASC-H/HSIL/AGC	Negative	ECC+4	Negative	LSIL	0	CIN1	LSIL	0	0	0
37	1-3	1-3	No	ASC-H/HSIL/AGC	Non-HPV 16/18	ECC+3	LSIL	Negative	0	CIN1	LSIL	0	0	0
37	1-3	1-3	No	ASC-H/HSIL/AGC	Non-HPV 16/18	ECC+2	Negative	Negative	0	Negative	Negative	0	0	0
37	1-3	1-3	No	ASC-H/HSIL/AGC	Negative	ECC		Negative	0	Negative	Negative	0	0	0
38	1-3	1-3	No	ASC-H/HSIL/AGC	HPV 16/18	ECC+4	LSIL	Negative	0	CIN1	LSIL	0	0	0
38	0	0	No	ASC-H/HSIL/AGC	Negative	ECC+2	Negative	Negative	0	Negative	Negative	0	0	0
38	1-3	1-3	No	ASC-H/HSIL/AGC	Non-HPV 16/18	ECC+2	Negative	Negative	0	Negative	Negative	0	0	0
39	1-3	1-3	No	ASC-H/HSIL/AGC	Non-HPV 16/18	ECC+4	HSIL+	HSIL+	0	CIN2	HSIL+	1	1	0
39	>3	1-3	No	ASC-H/HSIL/AGC	Non-HPV 16/18	ECC+3	HSIL+	HSIL+	0	CIN3+	HSIL+	1	1	0
39	>3	1-3	No	ASC-H/HSIL/AGC	HPV 16/18	ECC+4	Negative	Negative	0	Negative	Negative	0	0	0
40	1-3	1-3	No	ASC-H/HSIL/AGC	HPV 16/18	ECC+3	HSIL+	HSIL+	0	CIN3+	HSIL+	1	1	0
40	1-3	1-3	No	ASC-H/HSIL/AGC	HPV 16/18	ECC+3	HSIL+	Negative	0	CIN3+	HSIL+	1	0	1
40	>3	>3	No	ASC-H/HSIL/AGC	Non-HPV 16/18	ECC+3	LSIL	Negative	0	CIN1	LSIL	0	0	0
40	1-3	1-3	No	ASC-H/HSIL/AGC	Non-HPV 16/18	ECC+2	LSIL	Negative	0	CIN1	LSIL	0	0	0
41	1-3	1-3	No	ASC-H/HSIL/AGC	Non-HPV 16/18	ECC+3	HSIL+	HSIL+	0	CIN3+	HSIL+	1	1	0
41	>3	1-3	No	ASC-H/HSIL/AGC	Negative	ECC+4	LSIL	Negative	0	CIN1	LSIL	0	0	0
41	1-3	1-3	No	ASC-H/HSIL/AGC	Negative	ECC+2	Negative	Negative	0	Negative	Negative	0	0	0
41	1-3	1-3	No	ASC-H/HSIL/AGC	HPV 16/18	ECC+1	Negative	Negative	0	Negative	Negative	0	0	0
41	>3	1-3	No	ASC-H/HSIL/AGC	Non-HPV 16/18	ECC+3	Negative	Negative	0	Negative	Negative	0	0	0
41	>3	1-3	No	ASC-H/HSIL/AGC	Non-HPV 16/18	ECC+3	Negative	Negative	0	Negative	Negative	0	0	0
42	1-3	1-3	No	ASC-H/HSIL/AGC	Non-HPV 16/18	ECC+4	HSIL+	HSIL+	0	CIN2	HSIL+	1	1	0
42	>3	1-3	No	ASC-H/HSIL/AGC	HPV 16/18	ECC+3	Negative	HSIL+	1	CIN2	HSIL+	1	0	0
42	>3	1-3	No	ASC-H/HSIL/AGC	Non-HPV 16/18	ECC+4	Negative	LSIL	0	CIN1	LSIL	0	0	0
42	1-3	1-3	No	ASC-H/HSIL/AGC	Non-HPV 16/18	ECC+4	HSIL+	Negative	0	CIN2	HSIL+	1	0	1
42	>3	1-3	No	ASC-H/HSIL/AGC	Non-HPV 16/18	ECC+3	Negative	Negative	0	Negative	Negative	0	0	0
43	>3	1-3	No	ASC-H/HSIL/AGC	HPV 16/18	ECC+4	HSIL+	Negative	0	CIN3+	HSIL+	1	0	1
43	>3	1-3	No	ASC-H/HSIL/AGC	Non-HPV 16/18	ECC+4	LSIL	Negative	0	CIN1	LSIL	0	0	0
43	1-3	1-3	No	ASC-H/HSIL/AGC	Non-HPV 16/18	ECC+4	LSIL	Negative	0	CIN1	LSIL	0	0	0
43	1-3	1-3	No	ASC-H/HSIL/AGC	HPV 16/18	ECC+4	Negative	Negative	0	Negative	Negative	0	0	0
44	1-3	1-3	No	ASC-H/HSIL/AGC	Non-HPV 16/18	ECC+4	HSIL+	HSIL+	0	CIN3+	HSIL+	1	1	0
44	>3	1-3	No	ASC-H/HSIL/AGC	Non-HPV 16/18	ECC+2	Negative	HSIL+	1	CIN2	HSIL+	1	0	0
44	1-3	1-3	No	ASC-H/HSIL/AGC	Non-HPV 16/18	ECC+3	LSIL	Negative	0	CIN1	LSIL	0	0	0
44	1-3	1-3	Yes	ASC-H/HSIL/AGC	Non-HPV 16/18	ECC+3	Negative	Negative	0	Negative	Negative	0	0	0
44	1-3	1-3	No	ASC-H/HSIL/AGC	Non-HPV 16/18	ECC+4	Negative	Negative	0	Negative	Negative	0	0	0
45	>3	1-3	No	ASC-H/HSIL/AGC	Non-HPV 16/18	ECC+2	HSIL+	HSIL+	0	CIN3+	HSIL+	1	1	0
45	>3	1-3	Yes	ASC-H/HSIL/AGC	Non-HPV 16/18	ECC+4	Negative	HSIL+	1	CIN3+	HSIL+	1	0	0
45	>3	1-3	No	ASC-H/HSIL/AGC	Non-HPV 16/18	ECC+4	Negative	HSIL+	1	CIN2	HSIL+	1	0	0
45	1-3	1-3	No	ASC-H/HSIL/AGC	HPV 16/18	ECC+4	Negative	HSIL+	1	CIN3+	HSIL+	1	0	0
45	1-3	0	No	ASC-H/HSIL/AGC	Non-HPV 16/18	ECC+2	LSIL	Negative	0	CIN1	LSIL	0	0	0
46	>3	1-3	No	ASC-H/HSIL/AGC	Non-HPV 16/18	ECC+4	LSIL	LSIL	0	CIN1	LSIL	0	0	0
46	1-3	1-3	No	ASC-H/HSIL/AGC	Non-HPV 16/18	ECC+4	LSIL	LSIL	0	CIN1	LSIL	0	0	0
46	>3	1-3	Yes	ASC-H/HSIL/AGC	HPV 16/18	ECC+3	Negative	LSIL	0	CIN1	LSIL	0	0	0
46	1-3	1-3	No	ASC-H/HSIL/AGC	Non-HPV 16/18	ECC+4	LSIL	Negative	0	CIN1	LSIL	0	0	0
46	>3	1-3	No	ASC-H/HSIL/AGC	HPV 16/18	ECC+2	Negative	Negative	0	Negative	Negative	0	0	0
46	>3	1-3	No	ASC-H/HSIL/AGC	Non-HPV 16/18	ECC+2	Negative	Negative	0	Negative	Negative	0	0	0
47	>3	1-3	No	ASC-H/HSIL/AGC	Non-HPV 16/18	ECC+4	HSIL+	HSIL+	0	CIN2	HSIL+	1	1	0
47	>3	1-3	No	ASC-H/HSIL/AGC	Non-HPV 16/18	ECC+4	HSIL+	LSIL	0	CIN3+	HSIL+	1	0	1
47	>3	1-3	Yes	ASC-H/HSIL/AGC	HPV 16/18	ECC+4	Negative	Negative	0	Negative	Negative	0	0	0
48	1-3	1-3	No	ASC-H/HSIL/AGC	Non-HPV 16/18	ECC+3	HSIL+	HSIL+	0	CIN3+	HSIL+	1	1	0
48	>3	1-3	No	ASC-H/HSIL/AGC	HPV 16/18	ECC+4	Negative	HSIL+	1	CIN2	HSIL+	1	0	0
48	>3	1-3	Yes	ASC-H/HSIL/AGC	HPV 16/18	ECC+2	Negative	LSIL	0	Negative	Negative	0	0	0
48	1-3	1-3	No	ASC-H/HSIL/AGC	Non-HPV 16/18	ECC+4	LSIL	Negative	0	CIN1	LSIL	0	0	0
48	1-3	1-3	Yes	ASC-H/HSIL/AGC	Non-HPV 16/18	ECC+3	Negative	Negative	0	Negative	Negative	0	0	0
48	1-3	1-3	Yes	ASC-H/HSIL/AGC	HPV 16/18	ECC+4	Negative	Negative	0	Negative	Negative	0	0	0
48	1-3	1-3	No	ASC-H/HSIL/AGC	Negative	ECC+4	Negative	Negative	0	Negative	Negative	0	0	0
48	>3	1-3	Yes	ASC-H/HSIL/AGC	Negative	ECC		Negative	0	Negative	Negative	0	0	0
49	>3	>3	Yes	ASC-H/HSIL/AGC	Negative	ECC+4	HSIL+	HSIL+	0	CIN3+	HSIL+	1	1	0
49	1-3	1-3	No	ASC-H/HSIL/AGC	Non-HPV 16/18	ECC+3	Negative	HSIL+	1	CIN3+	HSIL+	1	0	0
49	1-3	1-3	Yes	ASC-H/HSIL/AGC	Non-HPV 16/18	ECC+2	LSIL	LSIL	0	CIN1	LSIL	0	0	0
49	1-3	1-3	No	ASC-H/HSIL/AGC	Non-HPV 16/18	ECC+4	LSIL	Negative	0	CIN1	LSIL	0	0	0
50	>3	1-3	No	ASC-H/HSIL/AGC	HPV 16/18	ECC+3	HSIL+	HSIL+	0	CIN3+	HSIL+	1	1	0
50	>3	1-3	No	ASC-H/HSIL/AGC	HPV 16/18	ECC+4	HSIL+	HSIL+	0	CIN3+	HSIL+	1	1	0
50	1-3	1-3	Yes	ASC-H/HSIL/AGC	Non-HPV 16/18	ECC+4	LSIL	Negative	0	CIN1	LSIL	0	0	0
51	>3	1-3	No	ASC-H/HSIL/AGC	Non-HPV 16/18	ECC+3	LSIL	HSIL+	1	CIN2	HSIL+	1	0	0
51	>3	1-3	No	ASC-H/HSIL/AGC	Non-HPV 16/18	ECC+3	LSIL	Negative	0	CIN1	LSIL	0	0	0
51	1-3	1-3	Yes	ASC-H/HSIL/AGC	Non-HPV 16/18	ECC+2	LSIL	Negative	0	CIN1	LSIL	0	0	0
51	1-3	1-3	Yes	ASC-H/HSIL/AGC	Non-HPV 16/18	ECC+4	Negative	Negative	0	Negative	Negative	0	0	0
51	1-3	1-3	No	ASC-H/HSIL/AGC	Negative	ECC+4	Negative	Negative	0	Negative	Negative	0	0	0
51	1-3	1-3	Yes	ASC-H/HSIL/AGC	HPV 16/18	ECC+4	Negative	Negative	0	Negative	Negative	0	0	0
51	1-3	1-3	Yes	ASC-H/HSIL/AGC	Non-HPV 16/18	ECC+2	Negative	Negative	0	Negative	Negative	0	0	0
51	>3	1-3	No	ASC-H/HSIL/AGC	Non-HPV 16/18	ECC+2	Negative	Negative	0	Negative	Negative	0	0	0
52	>3	1-3	Yes	ASC-H/HSIL/AGC	Non-HPV 16/18	ECC+4	HSIL+	HSIL+	0	CIN3+	HSIL+	1	1	0
52	1-3	1-3	Yes	ASC-H/HSIL/AGC	Non-HPV 16/18	ECC+4	HSIL+	HSIL+	0	CIN3+	HSIL+	1	1	0
52	>3	1-3	No	ASC-H/HSIL/AGC	Non-HPV 16/18	ECC+4	LSIL	HSIL+	1	CIN3+	HSIL+	1	0	0
52	1-3	1-3	Yes	ASC-H/HSIL/AGC	Non-HPV 16/18	ECC		LSIL	0	CIN1	LSIL	0	0	0
52	>3	1-3	Yes	ASC-H/HSIL/AGC	Non-HPV 16/18	ECC+3	LSIL	Negative	0	CIN1	LSIL	0	0	0
52	1-3	1-3	Yes	ASC-H/HSIL/AGC	HPV 16/18	ECC+4	Negative	Negative	0	Negative	Negative	0	0	0
52	1-3	1-3	Yes	ASC-H/HSIL/AGC	Negative	ECC+3	Negative	Negative	0	Negative	Negative	0	0	0
53	1-3	1-3	Yes	ASC-H/HSIL/AGC	HPV 16/18	ECC+3	HSIL+	HSIL+	0	CIN2	HSIL+	1	1	0
53	>3	1-3	Yes	ASC-H/HSIL/AGC	HPV 16/18	ECC+1	LSIL	Negative	0	CIN1	LSIL	0	0	0
53	1-3	1-3	Yes	ASC-H/HSIL/AGC	Non-HPV 16/18	ECC+4	Negative	Negative	0	Negative	Negative	0	0	0
53	>3	1-3	No	ASC-H/HSIL/AGC	Non-HPV 16/18	ECC+4	Negative	Negative	0	Negative	Negative	0	0	0
53	1-3	1-3	Yes	ASC-H/HSIL/AGC	HPV 16/18	ECC+4	Negative	Negative	0	Negative	Negative	0	0	0
54	>3	>3	Yes	ASC-H/HSIL/AGC	Non-HPV 16/18	ECC+3	LSIL	HSIL+	1	CIN2	HSIL+	1	0	0
54	1-3	1-3	No	ASC-H/HSIL/AGC	HPV 16/18	ECC+4	LSIL	HSIL+	1	CIN3+	HSIL+	1	0	0
54	1-3	1-3	Yes	ASC-H/HSIL/AGC	HPV 16/18	ECC+4	LSIL	LSIL	0	CIN1	LSIL	0	0	0
54	1-3	1-3	Yes	ASC-H/HSIL/AGC	HPV 16/18	ECC+4	HSIL+	Negative	0	CIN3+	HSIL+	1	0	1
54	1-3	1-3	Yes	ASC-H/HSIL/AGC	Non-HPV 16/18	ECC+3	LSIL	Negative	0	CIN1	LSIL	0	0	0
54	1-3	1-3	Yes	ASC-H/HSIL/AGC	Non-HPV 16/18	ECC+4	Negative	Negative	0	Negative	Negative	0	0	0
54	1-3	1-3	Yes	ASC-H/HSIL/AGC	Non-HPV 16/18	ECC+3	Negative	Negative	0	Negative	Negative	0	0	0
54	1-3	1-3	Yes	ASC-H/HSIL/AGC	HPV 16/18	ECC+2	Negative	Negative	0	Negative	Negative	0	0	0
55	1-3	1-3	Yes	ASC-H/HSIL/AGC	Non-HPV 16/18	ECC+4	HSIL+	HSIL+	0	CIN3+	HSIL+	1	1	0
55	1-3	1-3	Yes	ASC-H/HSIL/AGC	Non-HPV 16/18	ECC+4	Negative	LSIL	0	CIN1	LSIL	0	0	0
55	1-3	1-3	Yes	ASC-H/HSIL/AGC	Non-HPV 16/18	ECC+4	HSIL+	Negative	0	CIN2	HSIL+	1	0	1
55	1-3	1-3	Yes	ASC-H/HSIL/AGC	HPV 16/18	ECC+4	HSIL+	Negative	0	CIN2	HSIL+	1	0	1
55	1-3	1-3	Yes	ASC-H/HSIL/AGC	Non-HPV 16/18	ECC+3	Negative	Negative	0	Negative	Negative	0	0	0
55	>3	1-3	Yes	ASC-H/HSIL/AGC	Negative	ECC+2	Negative	Negative	0	Negative	Negative	0	0	0
55	>3	1-3	Yes	ASC-H/HSIL/AGC	HPV 16/18	ECC+4	Negative	Negative	0	Negative	Negative	0	0	0
55	1-3	1-3	Yes	ASC-H/HSIL/AGC	Negative	ECC+3	Negative	Negative	0	Negative	Negative	0	0	0
56	>3	1-3	Yes	ASC-H/HSIL/AGC	Non-HPV 16/18	ECC+3	LSIL	Negative	0	CIN1	LSIL	0	0	0
56	1-3	1-3	Yes	ASC-H/HSIL/AGC	Non-HPV 16/18	ECC+2	LSIL	Negative	0	CIN1	LSIL	0	0	0
56	1-3	1-3	Yes	ASC-H/HSIL/AGC	Non-HPV 16/18	ECC+4	Negative	Negative	0	Negative	Negative	0	0	0
56	>3	1-3	Yes	ASC-H/HSIL/AGC	Non-HPV 16/18	ECC+3	Negative	Negative	0	Negative	Negative	0	0	0
56	1-3	1-3	Yes	ASC-H/HSIL/AGC	Non-HPV 16/18	ECC+2	Negative	Negative	0	Negative	Negative	0	0	0
56	1-3	1-3	Yes	ASC-H/HSIL/AGC	Non-HPV 16/18	ECC+2	Negative	Negative	0	Negative	Negative	0	0	0
57	1-3	1-3	Yes	ASC-H/HSIL/AGC	HPV 16/18	ECC+3	HSIL+	HSIL+	0	CIN2	HSIL+	1	1	0
57	1-3	1-3	Yes	ASC-H/HSIL/AGC	Non-HPV 16/18	ECC+4	LSIL	HSIL+	1	CIN2	HSIL+	1	0	0
57	1-3	1-3	Yes	ASC-H/HSIL/AGC	Non-HPV 16/18	ECC+4	Negative	HSIL+	1	CIN2	HSIL+	1	0	0
57	>3	1-3	Yes	ASC-H/HSIL/AGC	Non-HPV 16/18	ECC+2	Negative	LSIL	0	CIN1	LSIL	0	0	0
57	1-3	1-3	Yes	ASC-H/HSIL/AGC	HPV 16/18	ECC+4	HSIL+	Negative	0	CIN3+	HSIL+	1	0	1
57	1-3	1-3	Yes	ASC-H/HSIL/AGC	Non-HPV 16/18	ECC+4	LSIL	Negative	0	CIN1	LSIL	0	0	0
57	1-3	1-3	Yes	ASC-H/HSIL/AGC	HPV 16/18	ECC+4	LSIL	Negative	0	CIN1	LSIL	0	0	0
57	>3	1-3	Yes	ASC-H/HSIL/AGC	Non-HPV 16/18	ECC+4	LSIL	Negative	0	CIN1	LSIL	0	0	0
57	>3	1-3	Yes	ASC-H/HSIL/AGC	Non-HPV 16/18	ECC+2	LSIL	Negative	0	CIN1	LSIL	0	0	0
57	1-3	1-3	Yes	ASC-H/HSIL/AGC	Non-HPV 16/18	ECC+4	Negative	Negative	0	Negative	Negative	0	0	0
57	1-3	1-3	Yes	ASC-H/HSIL/AGC	HPV 16/18	ECC+4	Negative	Negative	0	Negative	Negative	0	0	0
57	1-3	1-3	Yes	ASC-H/HSIL/AGC	Non-HPV 16/18	ECC+4	Negative	Negative	0	Negative	Negative	0	0	0
57	1-3	1-3	Yes	ASC-H/HSIL/AGC	Non-HPV 16/18	ECC+2	Negative	Negative	0	Negative	Negative	0	0	0
57	>3	1-3	Yes	ASC-H/HSIL/AGC	Non-HPV 16/18	ECC+3	Negative	Negative	0	Negative	Negative	0	0	0
58	>3	>3	Yes	ASC-H/HSIL/AGC	Non-HPV 16/18	ECC+4	Negative	LSIL	0	CIN1	LSIL	0	0	0
58	1-3	1-3	Yes	ASC-H/HSIL/AGC	Non-HPV 16/18	ECC+4	LSIL	Negative	0	CIN1	LSIL	0	0	0
58	1-3	1-3	Yes	ASC-H/HSIL/AGC	Non-HPV 16/18	ECC+4	Negative	Negative	0	Negative	Negative	0	0	0
58	1-3	1-3	Yes	ASC-H/HSIL/AGC	Non-HPV 16/18	ECC+4	Negative	Negative	0	Negative	Negative	0	0	0
58	>3	1-3	Yes	ASC-H/HSIL/AGC	Negative	ECC+3	Negative	Negative	0	Negative	Negative	0	0	0
58	1-3	1-3	Yes	ASC-H/HSIL/AGC	Non-HPV 16/18	ECC+2	Negative	Negative	0	Negative	Negative	0	0	0
59	>3	1-3	Yes	ASC-H/HSIL/AGC	Non-HPV 16/18	ECC+3	HSIL+	HSIL+	0	CIN3+	HSIL+	1	1	0
59	>3	1-3	Yes	ASC-H/HSIL/AGC	Non-HPV 16/18	ECC+4	LSIL	Negative	0	CIN1	LSIL	0	0	0
59	1-3	1-3	Yes	ASC-H/HSIL/AGC	HPV 16/18	ECC+4	LSIL	Negative	0	CIN1	LSIL	0	0	0
59	1-3	1-3	Yes	ASC-H/HSIL/AGC	Non-HPV 16/18	ECC+4	Negative	Negative	0	Negative	Negative	0	0	0
59	1-3	1-3	Yes	ASC-H/HSIL/AGC	Non-HPV 16/18	ECC	Negative	Negative	0	Negative	Negative	0	0	0
59	>3	1-3	Yes	ASC-H/HSIL/AGC	Non-HPV 16/18	ECC+4	Negative	Negative	0	Negative	Negative	0	0	0
60	1-3	1-3	Yes	ASC-H/HSIL/AGC	Non-HPV 16/18	ECC+2	Negative	HSIL+	1	CIN3+	HSIL+	1	0	0
60	>3	1-3	Yes	ASC-H/HSIL/AGC	Non-HPV 16/18	ECC+2	Negative	HSIL+	1	CIN3+	HSIL+	1	0	0
60	1-3	1-3	Yes	ASC-H/HSIL/AGC	Non-HPV 16/18	ECC+2	HSIL+	Negative	0	CIN2	HSIL+	1	0	1
60	1-3	1-3	Yes	ASC-H/HSIL/AGC	Non-HPV 16/18	ECC+3	LSIL	Negative	0	CIN1	LSIL	0	0	0
60	>3	1-3	Yes	ASC-H/HSIL/AGC	Non-HPV 16/18	ECC+3	LSIL	Negative	0	CIN1	LSIL	0	0	0
60	>3	1-3	Yes	ASC-H/HSIL/AGC	Non-HPV 16/18	ECC+4	Negative	Negative	0	Negative	Negative	0	0	0
61	1-3	1-3	Yes	ASC-H/HSIL/AGC	HPV 16/18	ECC+4	Negative	Negative	0	Negative	Negative	0	0	0
61	>3	1-3	Yes	ASC-H/HSIL/AGC	Non-HPV 16/18	ECC+4	Negative	Negative	0	Negative	Negative	0	0	0
61	1-3	1-3	Yes	ASC-H/HSIL/AGC	Non-HPV 16/18	ECC+3	Negative	Negative	0	Negative	Negative	0	0	0
62	>3	>3	Yes	ASC-H/HSIL/AGC	Non-HPV 16/18	ECC+3	LSIL	LSIL	0	CIN1	LSIL	0	0	0
62	1-3	1-3	Yes	ASC-H/HSIL/AGC	Non-HPV 16/18	ECC+2	LSIL	Negative	0	CIN1	LSIL	0	0	0
62	>3	>3	Yes	ASC-H/HSIL/AGC	Non-HPV 16/18	ECC+4	Negative	Negative	0	Negative	Negative	0	0	0
62	1-3	1-3	Yes	ASC-H/HSIL/AGC	Negative	ECC+3	Negative	Negative	0	Negative	Negative	0	0	0
63	>3	1-3	Yes	ASC-H/HSIL/AGC	Non-HPV 16/18	ECC+3	HSIL+	Negative	0	CIN2	HSIL+	1	0	1
63	1-3	1-3	Yes	ASC-H/HSIL/AGC	Non-HPV 16/18	ECC+3	Negative	Negative	0	Negative	Negative	0	0	0
63	>3	1-3	Yes	ASC-H/HSIL/AGC	Negative	ECC+2	Negative	Negative	0	Negative	Negative	0	0	0
63	>3	1-3	Yes	ASC-H/HSIL/AGC	Negative	ECC+3	Negative	Negative	0	Negative	Negative	0	0	0
64	>3	1-3	Yes	ASC-H/HSIL/AGC	HPV 16/18	ECC+4	HSIL+	HSIL+	0	CIN2	HSIL+	1	1	0
64	1-3	1-3	Yes	ASC-H/HSIL/AGC	Negative	ECC+4	Negative	Negative	0	Negative	Negative	0	0	0
64	>3	1-3	Yes	ASC-H/HSIL/AGC	Negative	ECC+3	Negative	Negative	0	Negative	Negative	0	0	0
65	>3	1-3	Yes	ASC-H/HSIL/AGC	Non-HPV 16/18	ECC+2	Negative	Negative	0	Negative	Negative	0	0	0
66	1-3	1-3	Yes	ASC-H/HSIL/AGC	Non-HPV 16/18	ECC+4	LSIL	HSIL+	1	CIN2	HSIL+	1	0	0
66	1-3	1-3	Yes	ASC-H/HSIL/AGC	Non-HPV 16/18	ECC+3	LSIL	Negative	0	CIN1	LSIL	0	0	0
67	>3	1-3	Yes	ASC-H/HSIL/AGC	Non-HPV 16/18	ECC+4	HSIL+	HSIL+	0	CIN3+	HSIL+	1	1	0
67	1-3	1-3	Yes	ASC-H/HSIL/AGC	Non-HPV 16/18	ECC+3	Negative	HSIL+	1	CIN2	HSIL+	1	0	0
67	1-3	1-3	Yes	ASC-H/HSIL/AGC	Negative	ECC+2	LSIL	Negative	0	CIN1	LSIL	0	0	0
68	1-3	1-3	Yes	ASC-H/HSIL/AGC	Non-HPV 16/18	ECC+3	LSIL	Negative	0	CIN1	LSIL	0	0	0
70	1-3	1-3	Yes	ASC-H/HSIL/AGC	Non-HPV 16/18	ECC+4	Negative	Negative	0	Negative	Negative	0	0	0
71	1-3	1-3	Yes	ASC-H/HSIL/AGC	Non-HPV 16/18	ECC+2	LSIL	HSIL+	1	CIN2	HSIL+	1	0	0
71	1-3	1-3	Yes	ASC-H/HSIL/AGC	HPV 16/18	ECC+3	Negative	Negative	0	Negative	Negative	0	0	0
72	>3	1-3	Yes	ASC-H/HSIL/AGC	Non-HPV 16/18	ECC+4	HSIL+	Negative	0	CIN2	HSIL+	1	0	1
73	1-3	1-3	Yes	ASC-H/HSIL/AGC	HPV 16/18	ECC+4	Negative	Negative	0	Negative	Negative	0	0	0
