# Supplementary material for: Retrospective analysis of cervical screening abnormalities in women with type 3 transformation zone without visible lesions
Source: PeerJ. 2025 Nov 27;13:e20396. doi: 10.7717/peerj.20396 (PMC12665263; doi:10.7717/peerj.20396)
Supplement: Supplemental Information 5 [file peerj-13-20396-s005.xlsx]

## Sheet: Sheet1
Age(year)	Gravidity	Parity	Menopause	TCT	HPV	ECC+Multiple Biopsies	Biopsies	ECC	HSIL+ yield by ECC alone	Histologic Diagnosis	Histology	HSIL+ yield by Biopsies / ECC	HSIL+ yield both by Biopsies and ECC	Additional HSIL+ yield by biopies	HSIL+	HSIL+ yield by Biopsies	Additional HSIL+ yield by ECC
65	1-3	1-3	Yes	ASCUS	Non-HPV 16/18	ECC+1	LSIL	Negative	0	CIN1	LSIL	0	0	0	0	0	0
65	1-3	1-3	Yes	ASCUS	Non-HPV 16/18	ECC+1	Negative	Negative	0	Negative	Negative	0	0	0	0	0	0
65	1-3	1-3	Yes	ASCUS	Non-HPV 16/18	ECC+1	Negative	Negative	0	Negative	Negative	0	0	0	0	0	0
65	1-3	1-3	Yes	NILM	Non-HPV 16/18	ECC+1	Negative	Negative	0	Negative	Negative	0	0	0	0	0	0
65	1-3	1-3	Yes	ASCUS	Non-HPV 16/18	ECC+2	LSIL	HSIL+	1	CIN1	HSIL+	0	0	0	0	0	0
65	>3	1-3	Yes	ASCUS	Non-HPV 16/18	ECC+2	LSIL	Negative	0	CIN1	LSIL	0	0	0	0	0	0
65	>3	1-3	Yes	ASCUS	Non-HPV 16/18	ECC+2	Negative	Negative	0	Negative	Negative	0	0	0	0	0	0
65	1-3	1-3	Yes	ASCUS	Non-HPV 16/18	ECC+2	Negative	Negative	0	Negative	Negative	0	0	0	0	0	0
65	1-3	1-3	Yes	ASCUS	Non-HPV 16/18	ECC+2	Negative	Negative	0	Negative	Negative	0	0	0	0	0	0
65	1-3	1-3	Yes	ASCUS	Non-HPV 16/18	ECC+2	Negative	Negative	0	Negative	Negative	0	0	0	0	0	0
65	>3	1-3	Yes	LSIL	Non-HPV 16/18	ECC+2	LSIL	Negative	0	CIN1	LSIL	0	0	0	0	0	0
65	>3	1-3	Yes	LSIL	Non-HPV 16/18	ECC+2	LSIL	Negative	0	CIN1	LSIL	0	0	0	0	0	0
65	1-3	1-3	Yes	NILM	Non-HPV 16/18	ECC+2	LSIL	Negative	0	CIN1	LSIL	0	0	0	0	0	0
65	1-3	1-3	Yes	NILM	Non-HPV 16/18	ECC+2	LSIL	Negative	0	CIN1	LSIL	0	0	0	0	0	0
65	1-3	1-3	Yes	NILM	Non-HPV 16/18	ECC+2	LSIL	Negative	0	CIN1	LSIL	0	0	0	0	0	0
65	1-3	1-3	Yes	NILM	Non-HPV 16/18	ECC+2	Negative	Negative	0	Negative	Negative	0	0	0	0	0	0
65	1-3	1-3	Yes	NILM	Non-HPV 16/18	ECC+2	Negative	Negative	0	Negative	Negative	0	0	0	0	0	0
65	>3	1-3	Yes	ASCUS	Non-HPV 16/18	ECC+3	LSIL	LSIL	0	CIN1	LSIL	0	0	0	0	0	0
65	>3	1-3	Yes	ASCUS	Non-HPV 16/18	ECC+3	LSIL	Negative	0	CIN1	LSIL	0	0	0	0	0	0
65	>3	1-3	Yes	ASCUS	Non-HPV 16/18	ECC+3	LSIL	Negative	0	CIN1	LSIL	0	0	0	0	0	0
65	1-3	1-3	Yes	LSIL	Non-HPV 16/18	ECC+3	LSIL	Negative	0	CIN1	LSIL	0	0	0	0	0	0
65	>3	1-3	Yes	NILM	Non-HPV 16/18	ECC+3	LSIL	Negative	0	CIN1	LSIL	0	0	0	0	0	0
65	>3	1-3	Yes	ASCUS	Non-HPV 16/18	ECC+4	LSIL	Negative	0	CIN1	LSIL	0	0	0	0	0	0
65	>3	1-3	Yes	ASCUS	Non-HPV 16/18	ECC+4	LSIL	Negative	0	CIN1	LSIL	0	0	0	0	0	0
65	>3	1-3	Yes	NILM	Non-HPV 16/18	ECC+4	LSIL	Negative	0	CIN1	LSIL	0	0	0	0	0	0
65	1-3	1-3	Yes	NILM	Non-HPV 16/18	ECC+4	Negative	Negative	0	Negative	Negative	0	0	0	0	0	0
66	>3	1-3	Yes	ASCUS	Non-HPV 16/18	ECC+1	Negative	Negative	0	Negative	Negative	0	0	0	0	0	0
66	1-3	1-3	Yes	NILM	Non-HPV 16/18	ECC+1	Negative	Negative	0	Negative	Negative	0	0	0	0	0	0
66	1-3	1-3	Yes	ASCUS	Non-HPV 16/18	ECC+2	Negative	LSIL	0	CIN1	LSIL	0	0	0	0	0	0
66	1-3	1-3	Yes	ASCUS	Non-HPV 16/18	ECC+2	LSIL	Negative	0	CIN1	LSIL	0	0	0	0	0	0
66	1-3	1-3	Yes	ASCUS	Non-HPV 16/18	ECC+2	LSIL	Negative	0	CIN1	LSIL	0	0	0	0	0	0
66	1-3	1-3	Yes	ASCUS	Non-HPV 16/18	ECC+2	Negative	Negative	0	Negative	Negative	0	0	0	0	0	0
66	>3	1-3	Yes	LSIL	Non-HPV 16/18	ECC+2	LSIL	Negative	0	CIN1	LSIL	0	0	0	0	0	0
66	1-3	1-3	Yes	NILM	Non-HPV 16/18	ECC+2	LSIL	LSIL	0	CIN1	LSIL	0	0	0	0	0	0
66	>3	1-3	Yes	NILM	Non-HPV 16/18	ECC+2	LSIL	Negative	0	CIN1	LSIL	0	0	0	0	0	0
66	>3	>3	Yes	NILM	Non-HPV 16/18	ECC+2	LSIL	Negative	0	CIN1	LSIL	0	0	0	0	0	0
66	>3	1-3	Yes	NILM	Non-HPV 16/18	ECC+2	LSIL	Negative	0	CIN1	LSIL	0	0	0	0	0	0
66	1-3	1-3	Yes	NILM	Non-HPV 16/18	ECC+2	Negative	Negative	0	Negative	Negative	0	0	0	0	0	0
66	1-3	1-3	Yes	NILM	Non-HPV 16/18	ECC+2	Negative	Negative	0	Negative	Negative	0	0	0	0	0	0
66	1-3	1-3	Yes	NILM	Non-HPV 16/18	ECC+2	Negative	Negative	0	Negative	Negative	0	0	0	0	0	0
66	1-3	1-3	Yes	ASCUS	Non-HPV 16/18	ECC+3	LSIL	Negative	0	CIN1	LSIL	0	0	0	0	0	0
66	1-3	1-3	Yes	NILM	Non-HPV 16/18	ECC+3	LSIL	Negative	0	CIN1	LSIL	0	0	0	0	0	0
66	1-3	1-3	Yes	NILM	Non-HPV 16/18	ECC+3	Negative	Negative	0	Negative	Negative	0	0	0	0	0	0
66	1-3	1-3	Yes	NILM	Non-HPV 16/18	ECC+4	Negative	Negative	0	Negative	Negative	0	0	0	0	0	0
67	1-3	1-3	Yes	ASCUS	Non-HPV 16/18	ECC+2	Negative	LSIL	0	CIN1	LSIL	0	0	0	0	0	0
67	>3	1-3	Yes	ASCUS	Non-HPV 16/18	ECC+2	LSIL	Negative	0	CIN1	LSIL	0	0	0	0	0	0
67	1-3	1-3	Yes	ASCUS	Non-HPV 16/18	ECC+2	Negative	Negative	0	Negative	Negative	0	0	0	0	0	0
67	1-3	1-3	Yes	ASCUS	Non-HPV 16/18	ECC+2	Negative	Negative	0	Negative	Negative	0	0	0	0	0	0
67	1-3	1-3	Yes	ASCUS	Non-HPV 16/18	ECC+2	Negative	Negative	0	Negative	Negative	0	0	0	0	0	0
67	>3	1-3	Yes	ASCUS	Non-HPV 16/18	ECC+2	Negative	Negative	0	Negative	Negative	0	0	0	0	0	0
67	1-3	1-3	Yes	LSIL	Non-HPV 16/18	ECC+2	Negative	Negative	0	Negative	Negative	0	0	0	0	0	0
67	>3	1-3	Yes	LSIL	Non-HPV 16/18	ECC+2	Negative	Negative	0	Negative	Negative	0	0	0	0	0	0
67	1-3	1-3	Yes	NILM	Non-HPV 16/18	ECC+2	Negative	Negative	0	Negative	Negative	0	0	0	0	0	0
67	>3	1-3	Yes	NILM	Non-HPV 16/18	ECC+2	Negative	Negative	0	Negative	Negative	0	0	0	0	0	0
67	1-3	1-3	Yes	NILM	Non-HPV 16/18	ECC+2	Negative	Negative	0	Negative	Negative	0	0	0	0	0	0
67	>3	>3	Yes	ASCUS	Non-HPV 16/18	ECC+3	LSIL	Negative	0	CIN1	LSIL	0	0	0	0	0	0
67	1-3	1-3	Yes	LSIL	Non-HPV 16/18	ECC+3	LSIL	Negative	0	CIN1	LSIL	0	0	0	0	0	0
67	>3	1-3	Yes	NILM	Non-HPV 16/18	ECC+3	Negative	Negative	0	Negative	Negative	0	0	0	0	0	0
67	1-3	1-3	Yes	NILM	Non-HPV 16/18	ECC+4	Negative	Negative	0	Negative	Negative	0	0	0	0	0	0
68	1-3	1-3	Yes	ASCUS	Non-HPV 16/18	ECC+1	Negative	Negative	0	Negative	Negative	0	0	0	0	0	0
68	>3	1-3	Yes	NILM	Non-HPV 16/18	ECC+1	Negative	Negative	0	Negative	Negative	0	0	0	0	0	0
68	1-3	1-3	Yes	ASCUS	Non-HPV 16/18	ECC+2	Negative	Negative	0	Negative	Negative	0	0	0	0	0	0
68	1-3	1-3	Yes	LSIL	Non-HPV 16/18	ECC+2	Negative	Negative	0	Negative	Negative	0	0	0	0	0	0
68	1-3	1-3	Yes	NILM	Non-HPV 16/18	ECC+2	Negative	Negative	0	Negative	Negative	0	0	0	0	0	0
68	>3	1-3	Yes	NILM	Non-HPV 16/18	ECC+2	Negative	Negative	0	Negative	Negative	0	0	0	0	0	0
68	1-3	1-3	Yes	ASCUS	Non-HPV 16/18	ECC+3	LSIL	LSIL	0	CIN1	LSIL	0	0	0	0	0	0
68	1-3	1-3	Yes	LSIL	Non-HPV 16/18	ECC+3	LSIL	Negative	0	CIN1	LSIL	0	0	0	0	0	0
68	1-3	1-3	Yes	LSIL	Non-HPV 16/18	ECC+3	Negative	Negative	0	Negative	Negative	0	0	0	0	0	0
68	1-3	1-3	Yes	ASCUS	Non-HPV 16/18	ECC+4	LSIL	Negative	0	CIN1	LSIL	0	0	0	0	0	0
68	>3	>3	Yes	NILM	Non-HPV 16/18	ECC+4	LSIL	Negative	0	CIN1	LSIL	0	0	0	0	0	0
68	>3	1-3	Yes	NILM	Non-HPV 16/18	ECC+4	Negative	Negative	0	Negative	Negative	0	0	0	0	0	0
69	1-3	1-3	Yes	ASCUS	Non-HPV 16/18	ECC+2	LSIL	Negative	0	CIN1	LSIL	0	0	0	0	0	0
69	1-3	1-3	Yes	ASCUS	Non-HPV 16/18	ECC+2	LSIL	Negative	0	CIN1	LSIL	0	0	0	0	0	0
69	>3	1-3	Yes	NILM	Non-HPV 16/18	ECC+2	LSIL	Negative	0	CIN1	LSIL	0	0	0	0	0	0
69	>3	1-3	Yes	NILM	Non-HPV 16/18	ECC+2	Negative	Negative	0	Negative	Negative	0	0	0	0	0	0
69	1-3	1-3	Yes	NILM	Non-HPV 16/18	ECC+2	Negative	Negative	0	Negative	Negative	0	0	0	0	0	0
69	1-3	1-3	Yes	ASCUS	Non-HPV 16/18	ECC+3	LSIL	Negative	0	CIN1	LSIL	0	0	0	0	0	0
69	1-3	1-3	Yes	ASCUS	Non-HPV 16/18	ECC+3	LSIL	Negative	0	CIN1	LSIL	0	0	0	0	0	0
69	>3	1-3	Yes	NILM	Non-HPV 16/18	ECC+3	Negative	Negative	0	Negative	Negative	0	0	0	0	0	0
69	1-3	1-3	Yes	ASCUS	Non-HPV 16/18	ECC+4	LSIL	LSIL	0	CIN1	LSIL	0	0	0	0	0	0
70	1-3	1-3	Yes	ASCUS	Non-HPV 16/18	ECC+1	Negative	LSIL	0	CIN1	LSIL	0	0	0	0	0	0
70	1-3	1-3	Yes	ASCUS	Non-HPV 16/18	ECC+2	Negative	Negative	0	Negative	Negative	0	0	0	0	0	0
70	1-3	1-3	Yes	LSIL	Non-HPV 16/18	ECC+2	LSIL	Negative	0	CIN1	LSIL	0	0	0	0	0	0
70	1-3	1-3	Yes	NILM	Non-HPV 16/18	ECC+2	Negative	Negative	0	Negative	Negative	0	0	0	0	0	0
70	1-3	1-3	Yes	NILM	Non-HPV 16/18	ECC+2	Negative	Negative	0	Negative	Negative	0	0	0	0	0	0
70	1-3	1-3	Yes	NILM	Non-HPV 16/18	ECC+3	LSIL	Negative	0	CIN1	LSIL	0	0	0	0	0	0
70	>3	1-3	Yes	ASCUS	Non-HPV 16/18	ECC+4	LSIL	Negative	0	CIN1	LSIL	0	0	0	0	0	0
70	1-3	1-3	Yes	ASCUS	Non-HPV 16/18	ECC+4	Negative	Negative	0	Negative	Negative	0	0	0	0	0	0
71	>3	>3	Yes	LSIL	Non-HPV 16/18	ECC+2	Negative	Negative	0	Negative	Negative	0	0	0	0	0	0
71	>3	1-3	Yes	NILM	Non-HPV 16/18	ECC+2	Negative	Negative	0	Negative	Negative	0	0	0	0	0	0
71	>3	1-3	Yes	LSIL	Non-HPV 16/18	ECC+4	LSIL	Negative	0	CIN1	LSIL	0	0	0	0	0	0
72	1-3	1-3	Yes	ASCUS	Non-HPV 16/18	ECC+1	LSIL	LSIL	0	CIN1	LSIL	0	0	0	0	0	0
72	>3	1-3	Yes	ASCUS	Non-HPV 16/18	ECC+1	LSIL	Negative	0	CIN1	LSIL	0	0	0	0	0	0
72	1-3	1-3	Yes	LSIL	Non-HPV 16/18	ECC+1	Negative	Negative	0	Negative	Negative	0	0	0	0	0	0
72	1-3	1-3	Yes	NILM	Non-HPV 16/18	ECC+3	Negative	Negative	0	Negative	Negative	0	0	0	0	0	0
72	>3	1-3	Yes	ASCUS	Non-HPV 16/18	ECC+4	LSIL	Negative	0	CIN1	LSIL	0	0	0	0	0	0
73	1-3	1-3	Yes	ASCUS	Non-HPV 16/18	ECC+2	Negative	Negative	0	Negative	Negative	0	0	0	0	0	0
74	1-3	1-3	Yes	LSIL	Non-HPV 16/18	ECC+2	Negative	Negative	0	Negative	Negative	0	0	0	0	0	0
74	1-3	1-3	Yes	NILM	Non-HPV 16/18	ECC+2	Negative	Negative	0	Negative	Negative	0	0	0	0	0	0
74	1-3	1-3	Yes	NILM	Non-HPV 16/18	ECC+2	Negative	Negative	0	Negative	Negative	0	0	0	0	0	0
75	1-3	1-3	Yes	LSIL	Non-HPV 16/18	ECC+3	LSIL	Negative	0	CIN1	LSIL	0	0	0	0	0	0
75	>3	1-3	Yes	NILM	Non-HPV 16/18	ECC+3	Negative	Negative	0	Negative	Negative	0	0	0	0	0	0
76	>3	1-3	Yes	NILM	Non-HPV 16/18	ECC+2	Negative	Negative	0	Negative	Negative	0	0	0	0	0	0
76	1-3	1-3	Yes	NILM	Non-HPV 16/18	ECC+3	Negative	Negative	0	Negative	Negative	0	0	0	0	0	0
76	>3	>3	Yes	ASCUS	Non-HPV 16/18	ECC+4	Negative	Negative	0	Negative	Negative	0	0	0	0	0	0
76	>3	1-3	Yes	ASCUS	Non-HPV 16/18	ECC+4	Negative	Negative	0	Negative	Negative	0	0	0	0	0	0
78	1-3	1-3	Yes	NILM	Non-HPV 16/18	ECC+1	Negative	Negative	0	Negative	Negative	0	0	0	0	0	0
80	>3	1-3	Yes	NILM	Non-HPV 16/18	ECC+2	Negative	Negative	0	Negative	Negative	0	0	0	0	0	0
66	1-3	1-3	Yes	NILM	Non-HPV 16/18	ECC+2	HSIL+	Negative	0	CIN3+	HSIL+	1	0	1	1	1	0
67	1-3	1-3	Yes	ASCUS	Non-HPV 16/18	ECC+4	HSIL+	Negative	0	CIN2	HSIL+	1	0	1	1	1	0
68	1-3	1-3	Yes	LSIL	Non-HPV 16/18	ECC+2	Negative	HSIL+	1	CIN3+	HSIL+	1	0	0	1	0	1
70	1-3	1-3	Yes	NILM	Non-HPV 16/18	ECC+2	Negative	HSIL+	1	CIN2	HSIL+	1	0	0	1	0	1
75	1-3	1-3	Yes	NILM	Non-HPV 16/18	ECC+1	HSIL+	HSIL+	0	CIN3+	HSIL+	1	1	0	1	1	0
