# Supplementary material for: Retrospective analysis of cervical screening abnormalities in women with type 3 transformation zone without visible lesions
Source: PeerJ. 2025 Nov 27;13:e20396. doi: 10.7717/peerj.20396 (PMC12665263; doi:10.7717/peerj.20396)
Supplement: Supplemental Information 6 [file peerj-13-20396-s006.xlsx]

## Sheet: Sheet1
Age(year)	Gravidity	Parity	Menopause	TCT	HPV	ECC+Multiple Biopsies	Biopsies	ECC	HSIL+ yield by ECC alone	Histologic Diagnosis	Histology	HSIL+ yield by Biopsies / ECC	HSIL+ yield both by Biopsies and ECC	Additional HSIL+ yield by biopies
55	1-3	1-3	Yes	ASCUS	Non-HPV 16/18	ECC+1	Negative	Negative	0	Negative	Negative	0	0	0
55	1-3	1-3	Yes	ASCUS	Non-HPV 16/18	ECC+1	Negative	Negative	0	Negative	Negative	0	0	0
55	1-3	1-3	Yes	ASCUS	Non-HPV 16/18	ECC+1	Negative	Negative	0	Negative	Negative	0	0	0
55	1-3	1-3	Yes	NILM	Non-HPV 16/18	ECC+1	LSIL	Negative	0	CIN1	LSIL	0	0	0
55	1-3	1-3	Yes	NILM	Non-HPV 16/18	ECC+1	Negative	Negative	0	Negative	Negative	0	0	0
55	1-3	1-3	Yes	NILM	Non-HPV 16/18	ECC+1	Negative	Negative	0	Negative	Negative	0	0	0
56	1-3	1-3	Yes	ASCUS	Non-HPV 16/18	ECC+1	Negative	Negative	0	Negative	Negative	0	0	0
56	1-3	1-3	Yes	ASCUS	Non-HPV 16/18	ECC+1	Negative	Negative	0	Negative	Negative	0	0	0
56	1-3	1-3	Yes	ASCUS	Non-HPV 16/18	ECC+1	Negative	Negative	0	Negative	Negative	0	0	0
56	>3	1-3	Yes	ASCUS	Non-HPV 16/18	ECC+1	Negative	Negative	0	Negative	Negative	0	0	0
56	1-3	1-3	Yes	ASCUS	Non-HPV 16/18	ECC+1	Negative	Negative	0	Negative	Negative	0	0	0
56	>3	1-3	Yes	NILM	Non-HPV 16/18	ECC+1	LSIL	Negative	0	CIN1	LSIL	0	0	0
56	1-3	1-3	Yes	NILM	Non-HPV 16/18	ECC+1	LSIL	Negative	0	CIN1	LSIL	0	0	0
56	1-3	1-3	Yes	NILM	Non-HPV 16/18	ECC+1	Negative	Negative	0	Negative	Negative	0	0	0
56	>3	1-3	Yes	NILM	Non-HPV 16/18	ECC+1	Negative	Negative	0	Negative	Negative	0	0	0
56	1-3	1-3	Yes	NILM	Non-HPV 16/18	ECC+1	Negative	Negative	0	Negative	Negative	0	0	0
56	1-3	1-3	Yes	NILM	Non-HPV 16/18	ECC+1	Negative	Negative	0	Negative	Negative	0	0	0
57	1-3	1-3	Yes	ASCUS	Non-HPV 16/18	ECC+1	HSIL+	Negative	0	CIN2	HSIL+	1	0	1
57	1-3	1-3	Yes	ASCUS	Non-HPV 16/18	ECC+1	Negative	Negative	0	Negative	Negative	0	0	0
57	1-3	1-3	Yes	ASCUS	Non-HPV 16/18	ECC+1	Negative	Negative	0	Negative	Negative	0	0	0
57	>3	1-3	Yes	ASCUS	Non-HPV 16/18	ECC+1	Negative	Negative	0	Negative	Negative	0	0	0
57	>3	1-3	Yes	ASCUS	Non-HPV 16/18	ECC+1	Negative	Negative	0	Negative	Negative	0	0	0
57	1-3	1-3	Yes	ASCUS	Non-HPV 16/18	ECC+1	Negative	Negative	0	Negative	Negative	0	0	0
57	>3	1-3	Yes	NILM	Non-HPV 16/18	ECC+1	LSIL	Negative	0	CIN1	LSIL	0	0	0
57	1-3	1-3	No	NILM	Non-HPV 16/18	ECC+1	Negative	Negative	0	Negative	Negative	0	0	0
57	1-3	1-3	Yes	NILM	Non-HPV 16/18	ECC+1	Negative	Negative	0	Negative	Negative	0	0	0
57	1-3	1-3	Yes	NILM	Non-HPV 16/18	ECC+1	Negative	Negative	0	Negative	Negative	0	0	0
57	1-3	1-3	Yes	NILM	Non-HPV 16/18	ECC+1	Negative	Negative	0	Negative	Negative	0	0	0
57	1-3	1-3	Yes	NILM	Non-HPV 16/18	ECC+1	Negative	Negative	0	Negative	Negative	0	0	0
57	1-3	1-3	Yes	NILM	Non-HPV 16/18	ECC+1	Negative	Negative	0	Negative	Negative	0	0	0
57	1-3	1-3	Yes	NILM	Non-HPV 16/18	ECC+1	Negative	Negative	0	Negative	Negative	0	0	0
57	1-3	1-3	Yes	NILM	Non-HPV 16/18	ECC+1	Negative	Negative	0	Negative	Negative	0	0	0
57	1-3	1-3	Yes	NILM	Non-HPV 16/18	ECC+1	Negative	Negative	0	Negative	Negative	0	0	0
57	1-3	1-3	Yes	NILM	Non-HPV 16/18	ECC+1	Negative	Negative	0	Negative	Negative	0	0	0
58	>3	1-3	Yes	ASCUS	Non-HPV 16/18	ECC+1	Negative	Negative	0	Negative	Negative	0	0	0
58	1-3	1-3	Yes	ASCUS	Non-HPV 16/18	ECC+1	Negative	Negative	0	Negative	Negative	0	0	0
58	1-3	1-3	Yes	ASCUS	Non-HPV 16/18	ECC+1	Negative	Negative	0	Negative	Negative	0	0	0
58	1-3	1-3	Yes	ASCUS	Non-HPV 16/18	ECC+1	Negative	Negative	0	Negative	Negative	0	0	0
58	1-3	1-3	Yes	LSIL	Non-HPV 16/18	ECC+1	Negative	Negative	0	Negative	Negative	0	0	0
58	>3	1-3	Yes	NILM	Non-HPV 16/18	ECC+1	LSIL	Negative	0	CIN1	LSIL	0	0	0
58	1-3	1-3	Yes	NILM	Non-HPV 16/18	ECC+1	Negative	Negative	0	Negative	Negative	0	0	0
58	1-3	1-3	Yes	NILM	Non-HPV 16/18	ECC+1	Negative	Negative	0	Negative	Negative	0	0	0
58	>3	1-3	Yes	NILM	Non-HPV 16/18	ECC+1	Negative	Negative	0	Negative	Negative	0	0	0
58	1-3	1-3	Yes	NILM	Non-HPV 16/18	ECC+1	Negative	Negative	0	Negative	Negative	0	0	0
59	1-3	1-3	Yes	ASCUS	Non-HPV 16/18	ECC+1	Negative	Negative	0	Negative	Negative	0	0	0
59	1-3	1-3	Yes	ASCUS	Non-HPV 16/18	ECC+1	Negative	Negative	0	Negative	Negative	0	0	0
59	1-3	1-3	Yes	ASCUS	Non-HPV 16/18	ECC+1	Negative	Negative	0	Negative	Negative	0	0	0
59	>3	1-3	Yes	LSIL	Non-HPV 16/18	ECC+1	LSIL	Negative	0	CIN1	LSIL	0	0	0
59	1-3	1-3	Yes	LSIL	Non-HPV 16/18	ECC+1	Negative	Negative	0	Negative	Negative	0	0	0
59	>3	1-3	Yes	NILM	Non-HPV 16/18	ECC+1	HSIL+	Negative	0	CIN2	HSIL+	1	0	1
59	>3	1-3	Yes	NILM	Non-HPV 16/18	ECC+1	LSIL	Negative	0	CIN1	LSIL	0	0	0
59	1-3	1-3	Yes	NILM	Non-HPV 16/18	ECC+1	Negative	Negative	0	Negative	Negative	0	0	0
59	1-3	1-3	Yes	NILM	Non-HPV 16/18	ECC+1	Negative	Negative	0	Negative	Negative	0	0	0
59	1-3	1-3	Yes	NILM	Non-HPV 16/18	ECC+1	Negative	Negative	0	Negative	Negative	0	0	0
59	1-3	1-3	Yes	NILM	Non-HPV 16/18	ECC+1	Negative	Negative	0	Negative	Negative	0	0	0
59	>3	1-3	Yes	NILM	Non-HPV 16/18	ECC+1	Negative	Negative	0	Negative	Negative	0	0	0
60	1-3	1-3	Yes	ASCUS	Non-HPV 16/18	ECC+1	Negative	Negative	0	Negative	Negative	0	0	0
60	1-3	1-3	Yes	ASCUS	Non-HPV 16/18	ECC+1	Negative	Negative	0	Negative	Negative	0	0	0
60	>3	1-3	Yes	ASCUS	Non-HPV 16/18	ECC+1	Negative	Negative	0	Negative	Negative	0	0	0
60	>3	1-3	Yes	ASCUS	Non-HPV 16/18	ECC+1	Negative	Negative	0	Negative	Negative	0	0	0
60	>3	1-3	Yes	LSIL	Non-HPV 16/18	ECC+1	Negative	Negative	0	Negative	Negative	0	0	0
60	>3	1-3	Yes	LSIL	Non-HPV 16/18	ECC+1	Negative	Negative	0	Negative	Negative	0	0	0
60	1-3	1-3	Yes	NILM	Non-HPV 16/18	ECC+1	Negative	Negative	0	Negative	Negative	0	0	0
60	>3	1-3	Yes	NILM	Non-HPV 16/18	ECC+1	Negative	Negative	0	Negative	Negative	0	0	0
60	1-3	1-3	Yes	NILM	Non-HPV 16/18	ECC+1	Negative	Negative	0	Negative	Negative	0	0	0
61	>3	1-3	Yes	ASCUS	Non-HPV 16/18	ECC+1	LSIL	LSIL	0	CIN1	LSIL	0	0	0
61	1-3	1-3	Yes	ASCUS	Non-HPV 16/18	ECC+1	LSIL	Negative	0	CIN1	LSIL	0	0	0
61	>3	1-3	Yes	ASCUS	Non-HPV 16/18	ECC+1	Negative	Negative	0	Negative	Negative	0	0	0
61	1-3	1-3	Yes	NILM	Non-HPV 16/18	ECC+1	LSIL	Negative	0	CIN1	LSIL	0	0	0
61	1-3	1-3	Yes	NILM	Non-HPV 16/18	ECC+1	Negative	Negative	0	Negative	Negative	0	0	0
62	1-3	1-3	Yes	ASCUS	Non-HPV 16/18	ECC+1	Negative	Negative	0	Negative	Negative	0	0	0
62	0	0	Yes	ASCUS	Non-HPV 16/18	ECC+1	Negative	Negative	0	Negative	Negative	0	0	0
62	1-3	1-3	Yes	NILM	Non-HPV 16/18	ECC+1	Negative	Negative	0	Negative	Negative	0	0	0
62	1-3	1-3	Yes	NILM	Non-HPV 16/18	ECC+1	Negative	Negative	0	Negative	Negative	0	0	0
62	1-3	1-3	Yes	NILM	Non-HPV 16/18	ECC+1	Negative	Negative	0	Negative	Negative	0	0	0
63	>3	1-3	Yes	NILM	Non-HPV 16/18	ECC+1	Negative	Negative	0	Negative	Negative	0	0	0
63	1-3	1-3	Yes	NILM	Non-HPV 16/18	ECC+1	Negative	Negative	0	Negative	Negative	0	0	0
64	>3	1-3	Yes	ASCUS	Non-HPV 16/18	ECC+1	Negative	Negative	0	Negative	Negative	0	0	0
64	1-3	1-3	Yes	ASCUS	Non-HPV 16/18	ECC+1	Negative	Negative	0	Negative	Negative	0	0	0
64	1-3	1-3	Yes	NILM	Non-HPV 16/18	ECC+1	Negative	Negative	0	Negative	Negative	0	0	0
65	1-3	1-3	Yes	ASCUS	Non-HPV 16/18	ECC+1	LSIL	Negative	0	CIN1	LSIL	0	0	0
65	1-3	1-3	Yes	ASCUS	Non-HPV 16/18	ECC+1	Negative	Negative	0	Negative	Negative	0	0	0
65	1-3	1-3	Yes	ASCUS	Non-HPV 16/18	ECC+1	Negative	Negative	0	Negative	Negative	0	0	0
65	1-3	1-3	Yes	NILM	Non-HPV 16/18	ECC+1	Negative	Negative	0	Negative	Negative	0	0	0
66	>3	1-3	Yes	ASCUS	Non-HPV 16/18	ECC+1	Negative	Negative	0	Negative	Negative	0	0	0
66	1-3	1-3	Yes	NILM	Non-HPV 16/18	ECC+1	Negative	Negative	0	Negative	Negative	0	0	0
68	1-3	1-3	Yes	ASCUS	Non-HPV 16/18	ECC+1	Negative	Negative	0	Negative	Negative	0	0	0
68	>3	1-3	Yes	NILM	Non-HPV 16/18	ECC+1	Negative	Negative	0	Negative	Negative	0	0	0
70	1-3	1-3	Yes	ASCUS	Non-HPV 16/18	ECC+1	Negative	LSIL	0	CIN1	LSIL	0	0	0
72	1-3	1-3	Yes	ASCUS	Non-HPV 16/18	ECC+1	LSIL	LSIL	0	CIN1	LSIL	0	0	0
72	>3	1-3	Yes	ASCUS	Non-HPV 16/18	ECC+1	LSIL	Negative	0	CIN1	LSIL	0	0	0
72	1-3	1-3	Yes	LSIL	Non-HPV 16/18	ECC+1	Negative	Negative	0	Negative	Negative	0	0	0
75	1-3	1-3	Yes	NILM	Non-HPV 16/18	ECC+1	HSIL+	HSIL+	0	CIN3+	HSIL+	1	1	0
78	1-3	1-3	Yes	NILM	Non-HPV 16/18	ECC+1	Negative	Negative	0	Negative	Negative	0	0	0
55	1-3	1-3	Yes	ASCUS	Non-HPV 16/18	ECC+2	Negative	LSIL	0	CIN1	LSIL	0	0	0
55	1-3	1-3	Yes	ASCUS	Non-HPV 16/18	ECC+2	LSIL	Negative	0	CIN1	LSIL	0	0	0
55	1-3	1-3	Yes	ASCUS	Non-HPV 16/18	ECC+2	LSIL	Negative	0	CIN1	LSIL	0	0	0
55	1-3	1-3	Yes	ASCUS	Non-HPV 16/18	ECC+2	Negative	Negative	0	Negative	Negative	0	0	0
55	1-3	1-3	Yes	ASCUS	Non-HPV 16/18	ECC+2	Negative	Negative	0	Negative	Negative	0	0	0
55	1-3	1-3	Yes	ASCUS	Non-HPV 16/18	ECC+2	Negative	Negative	0	Negative	Negative	0	0	0
55	1-3	1-3	Yes	ASCUS	Non-HPV 16/18	ECC+2	Negative	Negative	0	Negative	Negative	0	0	0
55	1-3	1-3	Yes	ASCUS	Non-HPV 16/18	ECC+2	Negative	Negative	0	Negative	Negative	0	0	0
55	1-3	1-3	Yes	ASCUS	Non-HPV 16/18	ECC+2	Negative	Negative	0	Negative	Negative	0	0	0
55	>3	1-3	Yes	ASCUS	Non-HPV 16/18	ECC+2	Negative	Negative	0	Negative	Negative	0	0	0
55	1-3	1-3	Yes	ASCUS	Non-HPV 16/18	ECC+2	Negative	Negative	0	Negative	Negative	0	0	0
55	1-3	1-3	Yes	ASCUS	Non-HPV 16/18	ECC+2	Negative	Negative	0	Negative	Negative	0	0	0
55	>3	1-3	Yes	ASCUS	Non-HPV 16/18	ECC+2	Negative	Negative	0	Negative	Negative	0	0	0
55	1-3	1-3	Yes	ASCUS	Non-HPV 16/18	ECC+2	Negative	Negative	0	Negative	Negative	0	0	0
55	1-3	1-3	Yes	ASCUS	Non-HPV 16/18	ECC+2	Negative	Negative	0	Negative	Negative	0	0	0
55	1-3	1-3	Yes	ASCUS	Non-HPV 16/18	ECC+2	Negative	Negative	0	Negative	Negative	0	0	0
55	1-3	1-3	Yes	ASCUS	Non-HPV 16/18	ECC+2	Negative	Negative	0	Negative	Negative	0	0	0
55	1-3	1-3	Yes	ASCUS	Non-HPV 16/18	ECC+2	Negative	Negative	0	Negative	Negative	0	0	0
55	1-3	1-3	Yes	ASCUS	Non-HPV 16/18	ECC+2	Negative	Negative	0	Negative	Negative	0	0	0
55	>3	1-3	Yes	ASCUS	Non-HPV 16/18	ECC+2	Negative	Negative	0	Negative	Negative	0	0	0
55	>3	1-3	Yes	ASCUS	Non-HPV 16/18	ECC+2	Negative	Negative	0	Negative	Negative	0	0	0
55	1-3	1-3	Yes	ASCUS	Non-HPV 16/18	ECC+2	Negative	Negative	0	Negative	Negative	0	0	0
55	>3	1-3	Yes	ASCUS	Non-HPV 16/18	ECC+2	Negative	Negative	0	Negative	Negative	0	0	0
55	1-3	1-3	No	ASCUS	Non-HPV 16/18	ECC+2		Negative	0	Negative	Negative	0	0	0
55	1-3	1-3	Yes	ASCUS	Non-HPV 16/18	ECC+2		Negative	0	Negative	Negative	0	0	0
55	1-3	1-3	Yes	LSIL	Non-HPV 16/18	ECC+2	LSIL	Negative	0	CIN1	LSIL	0	0	0
55	>3	>3	Yes	LSIL	Non-HPV 16/18	ECC+2	Negative	Negative	0	Negative	Negative	0	0	0
55	>3	1-3	Yes	LSIL	Non-HPV 16/18	ECC+2	Negative	Negative	0	Negative	Negative	0	0	0
55	1-3	1-3	Yes	LSIL	Non-HPV 16/18	ECC+2	Negative	Negative	0	Negative	Negative	0	0	0
55	>3	1-3	Yes	NILM	Non-HPV 16/18	ECC+2	LSIL	HSIL+	1	CIN2	HSIL+	1	0	0
55	1-3	1-3	No	NILM	Non-HPV 16/18	ECC+2	LSIL	LSIL	0	CIN1	LSIL	0	0	0
55	1-3	1-3	Yes	NILM	Non-HPV 16/18	ECC+2	LSIL	LSIL	0	CIN1	LSIL	0	0	0
55	>3	1-3	Yes	NILM	Non-HPV 16/18	ECC+2	Negative	LSIL	0	CIN1	LSIL	0	0	0
55	>3	1-3	Yes	NILM	Non-HPV 16/18	ECC+2	Negative	LSIL	0	CIN1	LSIL	0	0	0
55	>3	1-3	Yes	NILM	Non-HPV 16/18	ECC+2	LSIL	Negative	0	CIN1	LSIL	0	0	0
55	>3	1-3	Yes	NILM	Non-HPV 16/18	ECC+2	LSIL	Negative	0	CIN1	LSIL	0	0	0
55	>3	1-3	Yes	NILM	Non-HPV 16/18	ECC+2	LSIL	Negative	0	CIN1	LSIL	0	0	0
55	1-3	1-3	Yes	NILM	Non-HPV 16/18	ECC+2	LSIL	Negative	0	CIN1	LSIL	0	0	0
55	>3	1-3	Yes	NILM	Non-HPV 16/18	ECC+2	LSIL	Negative	0	CIN1	LSIL	0	0	0
55	>3	1-3	Yes	NILM	Non-HPV 16/18	ECC+2	LSIL	Negative	0	CIN1	LSIL	0	0	0
55	1-3	1-3	Yes	NILM	Non-HPV 16/18	ECC+2	Negative	Negative	0	Negative	Negative	0	0	0
55	1-3	1-3	Yes	NILM	Non-HPV 16/18	ECC+2	Negative	Negative	0	Negative	Negative	0	0	0
55	1-3	1-3	Yes	NILM	Non-HPV 16/18	ECC+2	Negative	Negative	0	Negative	Negative	0	0	0
55	>3	1-3	Yes	NILM	Non-HPV 16/18	ECC+2	Negative	Negative	0	Negative	Negative	0	0	0
55	1-3	1-3	Yes	NILM	Non-HPV 16/18	ECC+2	Negative	Negative	0	Negative	Negative	0	0	0
55	>3	1-3	Yes	NILM	Non-HPV 16/18	ECC+2	Negative	Negative	0	Negative	Negative	0	0	0
55	1-3	1-3	Yes	NILM	Non-HPV 16/18	ECC+2	Negative	Negative	0	Negative	Negative	0	0	0
55	>3	1-3	Yes	NILM	Non-HPV 16/18	ECC+2	Negative	Negative	0	Negative	Negative	0	0	0
55	>3	1-3	Yes	NILM	Non-HPV 16/18	ECC+2	Negative	Negative	0	Negative	Negative	0	0	0
55	>3	1-3	Yes	NILM	Non-HPV 16/18	ECC+2	Negative	Negative	0	Negative	Negative	0	0	0
55	1-3	1-3	Yes	NILM	Non-HPV 16/18	ECC+2	Negative	Negative	0	Negative	Negative	0	0	0
55	>3	1-3	Yes	NILM	Non-HPV 16/18	ECC+2	Negative	Negative	0	Negative	Negative	0	0	0
55	>3	1-3	Yes	NILM	Non-HPV 16/18	ECC+2	Negative	Negative	0	Negative	Negative	0	0	0
55	1-3	1-3	Yes	NILM	Non-HPV 16/18	ECC+2	Negative	Negative	0	Negative	Negative	0	0	0
55	1-3	1-3	Yes	NILM	Non-HPV 16/18	ECC+2	Negative	Negative	0	Negative	Negative	0	0	0
55	>3	1-3	Yes	NILM	Non-HPV 16/18	ECC+2	Negative	Negative	0	Negative	Negative	0	0	0
55	1-3	1-3	Yes	NILM	Non-HPV 16/18	ECC+2	Negative	Negative	0	Negative	Negative	0	0	0
55	>3	1-3	Yes	NILM	Non-HPV 16/18	ECC+2	Negative	Negative	0	Negative	Negative	0	0	0
56	>3	1-3	Yes	ASCUS	Non-HPV 16/18	ECC+2	Negative	LSIL	0	CIN1	LSIL	0	0	0
56	>3	1-3	Yes	ASCUS	Non-HPV 16/18	ECC+2	LSIL	Negative	0	CIN1	LSIL	0	0	0
56	1-3	1-3	Yes	ASCUS	Non-HPV 16/18	ECC+2	LSIL	Negative	0	CIN1	LSIL	0	0	0
56	>3	1-3	Yes	ASCUS	Non-HPV 16/18	ECC+2	LSIL	Negative	0	CIN1	LSIL	0	0	0
56	1-3	1-3	Yes	ASCUS	Non-HPV 16/18	ECC+2	LSIL	Negative	0	CIN1	LSIL	0	0	0
56	>3	1-3	Yes	ASCUS	Non-HPV 16/18	ECC+2	LSIL	Negative	0	CIN1	LSIL	0	0	0
56	1-3	1-3	Yes	ASCUS	Non-HPV 16/18	ECC+2	Negative	Negative	0	Negative	Negative	0	0	0
56	1-3	1-3	Yes	ASCUS	Non-HPV 16/18	ECC+2	Negative	Negative	0	Negative	Negative	0	0	0
56	>3	1-3	Yes	ASCUS	Non-HPV 16/18	ECC+2	Negative	Negative	0	Negative	Negative	0	0	0
56	1-3	1-3	Yes	ASCUS	Non-HPV 16/18	ECC+2	Negative	Negative	0	Negative	Negative	0	0	0
56	1-3	1-3	Yes	ASCUS	Non-HPV 16/18	ECC+2	Negative	Negative	0	Negative	Negative	0	0	0
56	1-3	1-3	Yes	ASCUS	Non-HPV 16/18	ECC+2	Negative	Negative	0	Negative	Negative	0	0	0
56	>3	1-3	Yes	ASCUS	Non-HPV 16/18	ECC+2	Negative	Negative	0	Negative	Negative	0	0	0
56	1-3	1-3	Yes	ASCUS	Non-HPV 16/18	ECC+2	Negative	Negative	0	Negative	Negative	0	0	0
56	1-3	1-3	Yes	ASCUS	Non-HPV 16/18	ECC+2	Negative	Negative	0	Negative	Negative	0	0	0
56	1-3	1-3	Yes	ASCUS	Non-HPV 16/18	ECC+2	Negative	Negative	0	Negative	Negative	0	0	0
56	1-3	1-3	No	ASCUS	Non-HPV 16/18	ECC+2	Negative	Negative	0	Negative	Negative	0	0	0
56	>3	1-3	Yes	ASCUS	Non-HPV 16/18	ECC+2	Negative	Negative	0	Negative	Negative	0	0	0
56	1-3	1-3	Yes	ASCUS	Non-HPV 16/18	ECC+2	Negative	Negative	0	Negative	Negative	0	0	0
56	1-3	1-3	Yes	ASCUS	Non-HPV 16/18	ECC+2	Negative	Negative	0	Negative	Negative	0	0	0
56	>3	1-3	Yes	ASCUS	Non-HPV 16/18	ECC+2	Negative	Negative	0	Negative	Negative	0	0	0
56	1-3	1-3	Yes	LSIL	Non-HPV 16/18	ECC+2	Negative	LSIL	0	CIN1	LSIL	0	0	0
56	1-3	1-3	Yes	LSIL	Non-HPV 16/18	ECC+2	LSIL	Negative	0	CIN1	LSIL	0	0	0
56	>3	1-3	Yes	LSIL	Non-HPV 16/18	ECC+2	Negative	Negative	0	Negative	Negative	0	0	0
56	>3	1-3	Yes	LSIL	Non-HPV 16/18	ECC+2	Negative	Negative	0	Negative	Negative	0	0	0
56	1-3	1-3	Yes	LSIL	Non-HPV 16/18	ECC+2	Negative	Negative	0	Negative	Negative	0	0	0
56	>3	1-3	Yes	LSIL	Non-HPV 16/18	ECC+2	Negative	Negative	0	Negative	Negative	0	0	0
56	1-3	1-3	Yes	LSIL	Non-HPV 16/18	ECC+2	Negative	Negative	0	Negative	Negative	0	0	0
56	1-3	1-3	Yes	LSIL	Non-HPV 16/18	ECC+2	Negative	Negative	0	Negative	Negative	0	0	0
56	>3	1-3	Yes	LSIL	Non-HPV 16/18	ECC+2	Negative	Negative	0	Negative	Negative	0	0	0
56	>3	1-3	Yes	LSIL	Non-HPV 16/18	ECC+2	Negative	Negative	0	Negative	Negative	0	0	0
56	>3	1-3	Yes	LSIL	Non-HPV 16/18	ECC+2	Negative	Negative	0	Negative	Negative	0	0	0
56	1-3	1-3	Yes	LSIL	Non-HPV 16/18	ECC+2	Negative	Negative	0	Negative	Negative	0	0	0
56	>3	1-3	Yes	NILM	Non-HPV 16/18	ECC+2	Negative	LSIL	0	CIN1	LSIL	0	0	0
56	>3	1-3	Yes	NILM	Non-HPV 16/18	ECC+2	LSIL	Negative	0	CIN1	LSIL	0	0	0
56	1-3	1-3	Yes	NILM	Non-HPV 16/18	ECC+2	LSIL	Negative	0	CIN1	LSIL	0	0	0
56	1-3	1-3	Yes	NILM	Non-HPV 16/18	ECC+2	Negative	Negative	0	Negative	Negative	0	0	0
56	1-3	1-3	Yes	NILM	Non-HPV 16/18	ECC+2	Negative	Negative	0	Negative	Negative	0	0	0
56	1-3	1-3	Yes	NILM	Non-HPV 16/18	ECC+2	Negative	Negative	0	Negative	Negative	0	0	0
56	>3	1-3	Yes	NILM	Non-HPV 16/18	ECC+2	Negative	Negative	0	Negative	Negative	0	0	0
56	1-3	1-3	Yes	NILM	Non-HPV 16/18	ECC+2	Negative	Negative	0	Negative	Negative	0	0	0
56	1-3	1-3	Yes	NILM	Non-HPV 16/18	ECC+2	Negative	Negative	0	Negative	Negative	0	0	0
56	>3	1-3	Yes	NILM	Non-HPV 16/18	ECC+2	Negative	Negative	0	Negative	Negative	0	0	0
56	1-3	1-3	Yes	NILM	Non-HPV 16/18	ECC+2	Negative	Negative	0	Negative	Negative	0	0	0
56	1-3	1-3	Yes	NILM	Non-HPV 16/18	ECC+2	Negative	Negative	0	Negative	Negative	0	0	0
56	1-3	1-3	Yes	NILM	Non-HPV 16/18	ECC+2	Negative	Negative	0	Negative	Negative	0	0	0
56	1-3	1-3	Yes	NILM	Non-HPV 16/18	ECC+2	Negative	Negative	0	Negative	Negative	0	0	0
56	>3	1-3	Yes	NILM	Non-HPV 16/18	ECC+2	Negative	Negative	0	Negative	Negative	0	0	0
56	1-3	1-3	Yes	NILM	Non-HPV 16/18	ECC+2	Negative	Negative	0	Negative	Negative	0	0	0
56	1-3	1-3	Yes	NILM	Non-HPV 16/18	ECC+2	Negative	Negative	0	Negative	Negative	0	0	0
56	>3	1-3	Yes	NILM	Non-HPV 16/18	ECC+2	Negative	Negative	0	Negative	Negative	0	0	0
56	>3	1-3	No	NILM	Non-HPV 16/18	ECC+2	Negative	Negative	0	Negative	Negative	0	0	0
56	1-3	1-3	Yes	NILM	Non-HPV 16/18	ECC+2	Negative	Negative	0	Negative	Negative	0	0	0
56	>3	1-3	Yes	NILM	Non-HPV 16/18	ECC+2	Negative	Negative	0	Negative	Negative	0	0	0
56	1-3	1-3	Yes	NILM	Non-HPV 16/18	ECC+2	Negative	Negative	0	Negative	Negative	0	0	0
56	1-3	1-3	Yes	NILM	Non-HPV 16/18	ECC+2	Negative	Negative	0	Negative	Negative	0	0	0
56	1-3	1-3	Yes	NILM	Non-HPV 16/18	ECC+2	Negative	Negative	0	Negative	Negative	0	0	0
57	1-3	1-3	Yes	ASCUS	Non-HPV 16/18	ECC+2	Negative	HSIL+	1	CIN3+	HSIL+	1	0	0
57	1-3	1-3	Yes	ASCUS	Non-HPV 16/18	ECC+2	LSIL	LSIL	0	CIN1	LSIL	0	0	0
57	>3	1-3	Yes	ASCUS	Non-HPV 16/18	ECC+2	LSIL	Negative	0	CIN1	LSIL	0	0	0
57	1-3	1-3	Yes	ASCUS	Non-HPV 16/18	ECC+2	LSIL	Negative	0	CIN1	LSIL	0	0	0
57	>3	1-3	Yes	ASCUS	Non-HPV 16/18	ECC+2	LSIL	Negative	0	CIN1	LSIL	0	0	0
57	>3	1-3	Yes	ASCUS	Non-HPV 16/18	ECC+2	LSIL	Negative	0	CIN1	LSIL	0	0	0
57	>3	1-3	Yes	ASCUS	Non-HPV 16/18	ECC+2	LSIL	Negative	0	CIN1	LSIL	0	0	0
57	>3	1-3	Yes	ASCUS	Non-HPV 16/18	ECC+2	LSIL	Negative	0	CIN1	LSIL	0	0	0
57	1-3	1-3	Yes	ASCUS	Non-HPV 16/18	ECC+2	LSIL	Negative	0	CIN1	LSIL	0	0	0
57	>3	>3	Yes	ASCUS	Non-HPV 16/18	ECC+2	LSIL	Negative	0	CIN1	LSIL	0	0	0
57	1-3	1-3	Yes	ASCUS	Non-HPV 16/18	ECC+2	LSIL	Negative	0	CIN1	LSIL	0	0	0
57	1-3	1-3	Yes	ASCUS	Non-HPV 16/18	ECC+2	LSIL	Negative	0	CIN1	LSIL	0	0	0
57	>3	1-3	Yes	ASCUS	Non-HPV 16/18	ECC+2	Negative	Negative	0	Negative	Negative	0	0	0
57	>3	1-3	Yes	ASCUS	Non-HPV 16/18	ECC+2	Negative	Negative	0	Negative	Negative	0	0	0
57	>3	>3	Yes	ASCUS	Non-HPV 16/18	ECC+2	Negative	Negative	0	Negative	Negative	0	0	0
57	1-3	1-3	Yes	ASCUS	Non-HPV 16/18	ECC+2	Negative	Negative	0	Negative	Negative	0	0	0
57	>3	1-3	Yes	ASCUS	Non-HPV 16/18	ECC+2	Negative	Negative	0	Negative	Negative	0	0	0
57	1-3	1-3	Yes	ASCUS	Non-HPV 16/18	ECC+2	Negative	Negative	0	Negative	Negative	0	0	0
57	1-3	1-3	No	ASCUS	Non-HPV 16/18	ECC+2	Negative	Negative	0	Negative	Negative	0	0	0
57	>3	1-3	Yes	ASCUS	Non-HPV 16/18	ECC+2	Negative	Negative	0	Negative	Negative	0	0	0
57	1-3	1-3	Yes	ASCUS	Non-HPV 16/18	ECC+2	Negative	Negative	0	Negative	Negative	0	0	0
57	>3	1-3	Yes	ASCUS	Non-HPV 16/18	ECC+2	Negative	Negative	0	Negative	Negative	0	0	0
57	1-3	1-3	Yes	ASCUS	Non-HPV 16/18	ECC+2	Negative	Negative	0	Negative	Negative	0	0	0
57	>3	1-3	Yes	ASCUS	Non-HPV 16/18	ECC+2	Negative	Negative	0	Negative	Negative	0	0	0
57	>3	1-3	Yes	ASCUS	Non-HPV 16/18	ECC+2	Negative	Negative	0	Negative	Negative	0	0	0
57	1-3	1-3	Yes	ASCUS	Non-HPV 16/18	ECC+2	Negative	Negative	0	Negative	Negative	0	0	0
57	1-3	1-3	Yes	ASCUS	Non-HPV 16/18	ECC+2	Negative	Negative	0	Negative	Negative	0	0	0
57	1-3	1-3	Yes	ASCUS	Non-HPV 16/18	ECC+2	Negative	Negative	0	Negative	Negative	0	0	0
57	>3	1-3	Yes	LSIL	Non-HPV 16/18	ECC+2	HSIL+	HSIL+	0	CIN3+	HSIL+	1	1	0
57	1-3	1-3	Yes	LSIL	Non-HPV 16/18	ECC+2	LSIL	Negative	0	CIN1	LSIL	0	0	0
57	1-3	1-3	Yes	LSIL	Non-HPV 16/18	ECC+2	LSIL	Negative	0	CIN1	LSIL	0	0	0
57	1-3	1-3	Yes	LSIL	Non-HPV 16/18	ECC+2	Negative	Negative	0	Negative	Negative	0	0	0
57	1-3	1-3	Yes	LSIL	Non-HPV 16/18	ECC+2	Negative	Negative	0	Negative	Negative	0	0	0
57	1-3	1-3	Yes	LSIL	Non-HPV 16/18	ECC+2	Negative	Negative	0	Negative	Negative	0	0	0
57	>3	1-3	Yes	NILM	Non-HPV 16/18	ECC+2	LSIL	LSIL	0	CIN1	LSIL	0	0	0
57	1-3	1-3	Yes	NILM	Non-HPV 16/18	ECC+2	LSIL	LSIL	0	CIN1	LSIL	0	0	0
57	1-3	1-3	Yes	NILM	Non-HPV 16/18	ECC+2	LSIL	Negative	0	CIN1	LSIL	0	0	0
57	1-3	1-3	Yes	NILM	Non-HPV 16/18	ECC+2	LSIL	Negative	0	CIN1	LSIL	0	0	0
57	1-3	1-3	Yes	NILM	Non-HPV 16/18	ECC+2	LSIL	Negative	0	CIN1	LSIL	0	0	0
57	1-3	1-3	Yes	NILM	Non-HPV 16/18	ECC+2	LSIL	Negative	0	CIN1	LSIL	0	0	0
57	1-3	1-3	Yes	NILM	Non-HPV 16/18	ECC+2	LSIL	Negative	0	CIN1	LSIL	0	0	0
57	1-3	1-3	Yes	NILM	Non-HPV 16/18	ECC+2	Negative	Negative	0	Negative	Negative	0	0	0
57	>3	1-3	Yes	NILM	Non-HPV 16/18	ECC+2	Negative	Negative	0	Negative	Negative	0	0	0
57	1-3	1-3	Yes	NILM	Non-HPV 16/18	ECC+2	Negative	Negative	0	Negative	Negative	0	0	0
57	1-3	1-3	Yes	NILM	Non-HPV 16/18	ECC+2	Negative	Negative	0	Negative	Negative	0	0	0
57	1-3	1-3	Yes	NILM	Non-HPV 16/18	ECC+2	Negative	Negative	0	Negative	Negative	0	0	0
57	>3	1-3	Yes	NILM	Non-HPV 16/18	ECC+2	Negative	Negative	0	Negative	Negative	0	0	0
57	1-3	1-3	Yes	NILM	Non-HPV 16/18	ECC+2	Negative	Negative	0	Negative	Negative	0	0	0
57	1-3	1-3	Yes	NILM	Non-HPV 16/18	ECC+2	Negative	Negative	0	Negative	Negative	0	0	0
57	1-3	1-3	Yes	NILM	Non-HPV 16/18	ECC+2	Negative	Negative	0	Negative	Negative	0	0	0
57	1-3	1-3	Yes	NILM	Non-HPV 16/18	ECC+2	Negative	Negative	0	Negative	Negative	0	0	0
57	1-3	1-3	Yes	NILM	Non-HPV 16/18	ECC+2	Negative	Negative	0	Negative	Negative	0	0	0
57	1-3	1-3	Yes	NILM	Non-HPV 16/18	ECC+2	Negative	Negative	0	Negative	Negative	0	0	0
57	1-3	1-3	Yes	NILM	Non-HPV 16/18	ECC+2	Negative	Negative	0	Negative	Negative	0	0	0
57	>3	1-3	Yes	NILM	Non-HPV 16/18	ECC+2	Negative	Negative	0	Negative	Negative	0	0	0
57	1-3	1-3	Yes	NILM	Non-HPV 16/18	ECC+2	Negative	Negative	0	Negative	Negative	0	0	0
57	>3	1-3	Yes	NILM	Non-HPV 16/18	ECC+2	Negative	Negative	0	Negative	Negative	0	0	0
57	1-3	1-3	Yes	NILM	Non-HPV 16/18	ECC+2	Negative	Negative	0	Negative	Negative	0	0	0
57	1-3	1-3	Yes	NILM	Non-HPV 16/18	ECC+2	Negative	Negative	0	Negative	Negative	0	0	0
57	1-3	1-3	Yes	NILM	Non-HPV 16/18	ECC+2	Negative	Negative	0	Negative	Negative	0	0	0
57	1-3	1-3	Yes	NILM	Non-HPV 16/18	ECC+2	Negative	Negative	0	Negative	Negative	0	0	0
57	1-3	1-3	Yes	NILM	Non-HPV 16/18	ECC+2	Negative	Negative	0	Negative	Negative	0	0	0
58	1-3	1-3	Yes	ASCUS	Non-HPV 16/18	ECC+2	Negative	LSIL	0	CIN1	LSIL	0	0	0
58	1-3	1-3	Yes	ASCUS	Non-HPV 16/18	ECC+2	Negative	LSIL	0	CIN1	LSIL	0	0	0
58	1-3	1-3	Yes	ASCUS	Non-HPV 16/18	ECC+2		LSIL	0	CIN1	LSIL	0	0	0
58	>3	1-3	Yes	ASCUS	Non-HPV 16/18	ECC+2	HSIL+	Negative	0	CIN2	HSIL+	1	0	1
58	>3	1-3	Yes	ASCUS	Non-HPV 16/18	ECC+2	LSIL	Negative	0	CIN1	LSIL	0	0	0
58	1-3	1-3	Yes	ASCUS	Non-HPV 16/18	ECC+2	LSIL	Negative	0	CIN1	LSIL	0	0	0
58	1-3	1-3	Yes	ASCUS	Non-HPV 16/18	ECC+2	LSIL	Negative	0	CIN1	LSIL	0	0	0
58	>3	1-3	Yes	ASCUS	Non-HPV 16/18	ECC+2	LSIL	Negative	0	CIN1	LSIL	0	0	0
58	1-3	1-3	Yes	ASCUS	Non-HPV 16/18	ECC+2	Negative	Negative	0	Negative	Negative	0	0	0
58	1-3	1-3	Yes	ASCUS	Non-HPV 16/18	ECC+2	Negative	Negative	0	Negative	Negative	0	0	0
58	1-3	1-3	Yes	ASCUS	Non-HPV 16/18	ECC+2	Negative	Negative	0	Negative	Negative	0	0	0
58	>3	1-3	Yes	ASCUS	Non-HPV 16/18	ECC+2	Negative	Negative	0	Negative	Negative	0	0	0
58	1-3	1-3	Yes	ASCUS	Non-HPV 16/18	ECC+2	Negative	Negative	0	Negative	Negative	0	0	0
58	1-3	1-3	Yes	ASCUS	Non-HPV 16/18	ECC+2	Negative	Negative	0	Negative	Negative	0	0	0
58	>3	1-3	Yes	ASCUS	Non-HPV 16/18	ECC+2	Negative	Negative	0	Negative	Negative	0	0	0
58	1-3	1-3	Yes	ASCUS	Non-HPV 16/18	ECC+2	Negative	Negative	0	Negative	Negative	0	0	0
58	>3	>3	Yes	ASCUS	Non-HPV 16/18	ECC+2	Negative	Negative	0	Negative	Negative	0	0	0
58	>3	1-3	Yes	ASCUS	Non-HPV 16/18	ECC+2	Negative	Negative	0	Negative	Negative	0	0	0
58	1-3	1-3	Yes	ASCUS	Non-HPV 16/18	ECC+2	Negative	Negative	0	Negative	Negative	0	0	0
58	>3	1-3	Yes	ASCUS	Non-HPV 16/18	ECC+2	Negative	Negative	0	Negative	Negative	0	0	0
58	>3	1-3	Yes	ASCUS	Non-HPV 16/18	ECC+2	Negative	Negative	0	Negative	Negative	0	0	0
58	1-3	1-3	Yes	ASCUS	Non-HPV 16/18	ECC+2	Negative	Negative	0	Negative	Negative	0	0	0
58	1-3	1-3	Yes	ASCUS	Non-HPV 16/18	ECC+2	Negative	Negative	0	Negative	Negative	0	0	0
58	>3	1-3	Yes	ASCUS	Non-HPV 16/18	ECC+2	Negative	Negative	0	Negative	Negative	0	0	0
58	1-3	1-3	Yes	LSIL	Non-HPV 16/18	ECC+2	LSIL	Negative	0	CIN1	LSIL	0	0	0
58	1-3	1-3	Yes	LSIL	Non-HPV 16/18	ECC+2	Negative	Negative	0	Negative	Negative	0	0	0
58	1-3	1-3	Yes	LSIL	Non-HPV 16/18	ECC+2	Negative	Negative	0	Negative	Negative	0	0	0
58	>3	1-3	Yes	NILM	Non-HPV 16/18	ECC+2	Negative	LSIL	0	CIN1	LSIL	0	0	0
58	>3	1-3	Yes	NILM	Non-HPV 16/18	ECC+2	Negative	LSIL	0	CIN1	LSIL	0	0	0
58	>3	1-3	Yes	NILM	Non-HPV 16/18	ECC+2	LSIL	Negative	0	CIN1	LSIL	0	0	0
58	1-3	1-3	Yes	NILM	Non-HPV 16/18	ECC+2	LSIL	Negative	0	CIN1	LSIL	0	0	0
58	1-3	1-3	Yes	NILM	Non-HPV 16/18	ECC+2	LSIL	Negative	0	CIN1	LSIL	0	0	0
58	>3	>3	Yes	NILM	Non-HPV 16/18	ECC+2	LSIL	Negative	0	CIN1	LSIL	0	0	0
58	>3	1-3	Yes	NILM	Non-HPV 16/18	ECC+2	LSIL	Negative	0	CIN1	LSIL	0	0	0
58	1-3	1-3	Yes	NILM	Non-HPV 16/18	ECC+2	LSIL	Negative	0	CIN1	LSIL	0	0	0
58	>3	>3	Yes	NILM	Non-HPV 16/18	ECC+2	LSIL	Negative	0	CIN1	LSIL	0	0	0
58	>3	1-3	Yes	NILM	Non-HPV 16/18	ECC+2	LSIL	Negative	0	CIN1	LSIL	0	0	0
58	1-3	1-3	Yes	NILM	Non-HPV 16/18	ECC+2	LSIL	Negative	0	CIN1	LSIL	0	0	0
58	>3	1-3	Yes	NILM	Non-HPV 16/18	ECC+2	LSIL	Negative	0	CIN1	LSIL	0	0	0
58	>3	1-3	Yes	NILM	Non-HPV 16/18	ECC+2	LSIL	Negative	0	CIN1	LSIL	0	0	0
58	1-3	1-3	Yes	NILM	Non-HPV 16/18	ECC+2	Negative	Negative	0	Negative	Negative	0	0	0
58	1-3	1-3	Yes	NILM	Non-HPV 16/18	ECC+2	Negative	Negative	0	Negative	Negative	0	0	0
58	1-3	1-3	Yes	NILM	Non-HPV 16/18	ECC+2	Negative	Negative	0	Negative	Negative	0	0	0
58	1-3	1-3	Yes	NILM	Non-HPV 16/18	ECC+2	Negative	Negative	0	Negative	Negative	0	0	0
58	1-3	1-3	Yes	NILM	Non-HPV 16/18	ECC+2	Negative	Negative	0	Negative	Negative	0	0	0
58	1-3	1-3	Yes	NILM	Non-HPV 16/18	ECC+2	Negative	Negative	0	Negative	Negative	0	0	0
58	1-3	1-3	Yes	NILM	Non-HPV 16/18	ECC+2	Negative	Negative	0	Negative	Negative	0	0	0
58	1-3	1-3	Yes	NILM	Non-HPV 16/18	ECC+2	Negative	Negative	0	Negative	Negative	0	0	0
58	>3	1-3	Yes	NILM	Non-HPV 16/18	ECC+2	Negative	Negative	0	Negative	Negative	0	0	0
58	>3	1-3	Yes	NILM	Non-HPV 16/18	ECC+2	Negative	Negative	0	Negative	Negative	0	0	0
58	1-3	1-3	No	NILM	Non-HPV 16/18	ECC+2	Negative	Negative	0	Negative	Negative	0	0	0
58	1-3	1-3	Yes	NILM	Non-HPV 16/18	ECC+2	Negative	Negative	0	Negative	Negative	0	0	0
58	1-3	1-3	Yes	NILM	Non-HPV 16/18	ECC+2	Negative	Negative	0	Negative	Negative	0	0	0
58	1-3	1-3	Yes	NILM	Non-HPV 16/18	ECC+2	Negative	Negative	0	Negative	Negative	0	0	0
58	1-3	1-3	Yes	NILM	Non-HPV 16/18	ECC+2	Negative	Negative	0	Negative	Negative	0	0	0
58	>3	1-3	Yes	NILM	Non-HPV 16/18	ECC+2	Negative	Negative	0	Negative	Negative	0	0	0
58	>3	1-3	Yes	NILM	Non-HPV 16/18	ECC+2	Negative	Negative	0	Negative	Negative	0	0	0
59	>3	1-3	Yes	ASCUS	Non-HPV 16/18	ECC+2	LSIL	Negative	0	CIN1	LSIL	0	0	0
59	1-3	1-3	Yes	ASCUS	Non-HPV 16/18	ECC+2	LSIL	Negative	0	CIN1	LSIL	0	0	0
59	1-3	1-3	Yes	ASCUS	Non-HPV 16/18	ECC+2	LSIL	Negative	0	CIN1	LSIL	0	0	0
59	>3	1-3	Yes	ASCUS	Non-HPV 16/18	ECC+2	LSIL	Negative	0	CIN1	LSIL	0	0	0
59	1-3	1-3	Yes	ASCUS	Non-HPV 16/18	ECC+2	LSIL	Negative	0	CIN1	LSIL	0	0	0
59	1-3	1-3	Yes	ASCUS	Non-HPV 16/18	ECC+2	LSIL	Negative	0	CIN1	LSIL	0	0	0
59	>3	1-3	Yes	ASCUS	Non-HPV 16/18	ECC+2	Negative	Negative	0	Negative	Negative	0	0	0
59	>3	1-3	Yes	ASCUS	Non-HPV 16/18	ECC+2	Negative	Negative	0	Negative	Negative	0	0	0
59	>3	1-3	Yes	ASCUS	Non-HPV 16/18	ECC+2	Negative	Negative	0	Negative	Negative	0	0	0
59	1-3	1-3	Yes	ASCUS	Non-HPV 16/18	ECC+2	Negative	Negative	0	Negative	Negative	0	0	0
59	1-3	1-3	Yes	ASCUS	Non-HPV 16/18	ECC+2	Negative	Negative	0	Negative	Negative	0	0	0
59	1-3	1-3	Yes	ASCUS	Non-HPV 16/18	ECC+2	Negative	Negative	0	Negative	Negative	0	0	0
59	>3	1-3	Yes	ASCUS	Non-HPV 16/18	ECC+2	Negative	Negative	0	Negative	Negative	0	0	0
59	1-3	1-3	Yes	ASCUS	Non-HPV 16/18	ECC+2	Negative	Negative	0	Negative	Negative	0	0	0
59	1-3	1-3	Yes	ASCUS	Non-HPV 16/18	ECC+2	Negative	Negative	0	Negative	Negative	0	0	0
59	>3	1-3	Yes	ASCUS	Non-HPV 16/18	ECC+2	Negative	Negative	0	Negative	Negative	0	0	0
59	1-3	1-3	Yes	ASCUS	Non-HPV 16/18	ECC+2	Negative	Negative	0	Negative	Negative	0	0	0
59	1-3	1-3	Yes	ASCUS	Non-HPV 16/18	ECC+2	Negative	Negative	0	Negative	Negative	0	0	0
59	1-3	1-3	Yes	LSIL	Non-HPV 16/18	ECC+2	Negative	Negative	0	Negative	Negative	0	0	0
59	>3	1-3	Yes	NILM	Non-HPV 16/18	ECC+2	LSIL	LSIL	0	CIN1	LSIL	0	0	0
59	1-3	1-3	Yes	NILM	Non-HPV 16/18	ECC+2	LSIL	Negative	0	CIN1	LSIL	0	0	0
59	1-3	1-3	Yes	NILM	Non-HPV 16/18	ECC+2	LSIL	Negative	0	CIN1	LSIL	0	0	0
59	>3	1-3	Yes	NILM	Non-HPV 16/18	ECC+2	LSIL	Negative	0	CIN1	LSIL	0	0	0
59	1-3	1-3	Yes	NILM	Non-HPV 16/18	ECC+2	LSIL	Negative	0	CIN1	LSIL	0	0	0
59	1-3	1-3	Yes	NILM	Non-HPV 16/18	ECC+2	Negative	Negative	0	Negative	Negative	0	0	0
59	1-3	1-3	Yes	NILM	Non-HPV 16/18	ECC+2	Negative	Negative	0	Negative	Negative	0	0	0
59	>3	1-3	Yes	NILM	Non-HPV 16/18	ECC+2	Negative	Negative	0	Negative	Negative	0	0	0
59	1-3	1-3	Yes	NILM	Non-HPV 16/18	ECC+2	Negative	Negative	0	Negative	Negative	0	0	0
59	>3	1-3	Yes	NILM	Non-HPV 16/18	ECC+2	Negative	Negative	0	Negative	Negative	0	0	0
59	>3	1-3	Yes	NILM	Non-HPV 16/18	ECC+2	Negative	Negative	0	Negative	Negative	0	0	0
59	>3	1-3	Yes	NILM	Non-HPV 16/18	ECC+2	Negative	Negative	0	Negative	Negative	0	0	0
59	>3	1-3	Yes	NILM	Non-HPV 16/18	ECC+2	Negative	Negative	0	Negative	Negative	0	0	0
59	1-3	1-3	Yes	NILM	Non-HPV 16/18	ECC+2	Negative	Negative	0	Negative	Negative	0	0	0
59	1-3	1-3	Yes	NILM	Non-HPV 16/18	ECC+2	Negative	Negative	0	Negative	Negative	0	0	0
59	1-3	1-3	Yes	NILM	Non-HPV 16/18	ECC+2	Negative	Negative	0	Negative	Negative	0	0	0
59	1-3	1-3	Yes	NILM	Non-HPV 16/18	ECC+2	Negative	Negative	0	Negative	Negative	0	0	0
59	>3	1-3	Yes	NILM	Non-HPV 16/18	ECC+2	Negative	Negative	0	Negative	Negative	0	0	0
59	1-3	1-3	Yes	NILM	Non-HPV 16/18	ECC+2	Negative	Negative	0	Negative	Negative	0	0	0
59	1-3	1-3	Yes	NILM	Non-HPV 16/18	ECC+2	Negative	Negative	0	Negative	Negative	0	0	0
59	>3	1-3	Yes	NILM	Non-HPV 16/18	ECC+2	Negative	Negative	0	Negative	Negative	0	0	0
59	1-3	1-3	Yes	NILM	Non-HPV 16/18	ECC+2	Negative	Negative	0	Negative	Negative	0	0	0
59	>3	1-3	Yes	NILM	Non-HPV 16/18	ECC+2	Negative	Negative	0	Negative	Negative	0	0	0
60	1-3	1-3	Yes	ASCUS	Non-HPV 16/18	ECC+2	LSIL	Negative	0	CIN1	LSIL	0	0	0
60	>3	1-3	Yes	ASCUS	Non-HPV 16/18	ECC+2	LSIL	Negative	0	CIN1	LSIL	0	0	0
60	1-3	1-3	Yes	ASCUS	Non-HPV 16/18	ECC+2	LSIL	Negative	0	CIN1	LSIL	0	0	0
60	1-3	1-3	Yes	ASCUS	Non-HPV 16/18	ECC+2	LSIL	Negative	0	CIN1	LSIL	0	0	0
60	>3	1-3	Yes	ASCUS	Non-HPV 16/18	ECC+2	Negative	Negative	0	Negative	Negative	0	0	0
60	1-3	1-3	Yes	ASCUS	Non-HPV 16/18	ECC+2	Negative	Negative	0	Negative	Negative	0	0	0
60	>3	>3	Yes	ASCUS	Non-HPV 16/18	ECC+2	Negative	Negative	0	Negative	Negative	0	0	0
60	1-3	1-3	Yes	ASCUS	Non-HPV 16/18	ECC+2	Negative	Negative	0	Negative	Negative	0	0	0
60	>3	1-3	Yes	ASCUS	Non-HPV 16/18	ECC+2	Negative	Negative	0	Negative	Negative	0	0	0
60	1-3	1-3	Yes	ASCUS	Non-HPV 16/18	ECC+2	Negative	Negative	0	Negative	Negative	0	0	0
60	>3	1-3	Yes	LSIL	Non-HPV 16/18	ECC+2	LSIL	Negative	0	CIN1	LSIL	0	0	0
60	1-3	1-3	Yes	LSIL	Non-HPV 16/18	ECC+2	LSIL	Negative	0	CIN1	LSIL	0	0	0
60	1-3	1-3	Yes	LSIL	Non-HPV 16/18	ECC+2	Negative	Negative	0	Negative	Negative	0	0	0
60	1-3	1-3	Yes	LSIL	Non-HPV 16/18	ECC+2	Negative	Negative	0	Negative	Negative	0	0	0
60	1-3	1-3	Yes	LSIL	Non-HPV 16/18	ECC+2	Negative	Negative	0	Negative	Negative	0	0	0
60	1-3	1-3	Yes	LSIL	Non-HPV 16/18	ECC+2	Negative	Negative	0	Negative	Negative	0	0	0
60	1-3	1-3	Yes	NILM	Non-HPV 16/18	ECC+2	LSIL	LSIL	0	CIN1	LSIL	0	0	0
60	>3	1-3	Yes	NILM	Non-HPV 16/18	ECC+2	LSIL	Negative	0	CIN1	LSIL	0	0	0
60	1-3	1-3	Yes	NILM	Non-HPV 16/18	ECC+2	LSIL	Negative	0	CIN1	LSIL	0	0	0
60	>3	1-3	Yes	NILM	Non-HPV 16/18	ECC+2	LSIL	Negative	0	CIN1	LSIL	0	0	0
60	1-3	1-3	Yes	NILM	Non-HPV 16/18	ECC+2	LSIL	Negative	0	CIN1	LSIL	0	0	0
60	1-3	1-3	Yes	NILM	Non-HPV 16/18	ECC+2	Negative	Negative	0	Negative	Negative	0	0	0
60	>3	1-3	Yes	NILM	Non-HPV 16/18	ECC+2	Negative	Negative	0	Negative	Negative	0	0	0
60	1-3	1-3	Yes	NILM	Non-HPV 16/18	ECC+2	Negative	Negative	0	Negative	Negative	0	0	0
60	>3	1-3	Yes	NILM	Non-HPV 16/18	ECC+2	Negative	Negative	0	Negative	Negative	0	0	0
60	1-3	1-3	Yes	NILM	Non-HPV 16/18	ECC+2	Negative	Negative	0	Negative	Negative	0	0	0
60	1-3	1-3	Yes	NILM	Non-HPV 16/18	ECC+2	Negative	Negative	0	Negative	Negative	0	0	0
60	1-3	1-3	Yes	NILM	Non-HPV 16/18	ECC+2	Negative	Negative	0	Negative	Negative	0	0	0
60	>3	1-3	Yes	NILM	Non-HPV 16/18	ECC+2	Negative	Negative	0	Negative	Negative	0	0	0
60	1-3	1-3	Yes	NILM	Non-HPV 16/18	ECC+2	Negative	Negative	0	Negative	Negative	0	0	0
60	1-3	1-3	Yes	NILM	Non-HPV 16/18	ECC+2	Negative	Negative	0	Negative	Negative	0	0	0
60	>3	1-3	Yes	NILM	Non-HPV 16/18	ECC+2	Negative	Negative	0	Negative	Negative	0	0	0
60	1-3	1-3	Yes	NILM	Non-HPV 16/18	ECC+2	Negative	Negative	0	Negative	Negative	0	0	0
61	>3	1-3	Yes	ASCUS	Non-HPV 16/18	ECC+2	LSIL	Negative	0	CIN1	LSIL	0	0	0
61	1-3	1-3	Yes	ASCUS	Non-HPV 16/18	ECC+2	LSIL	Negative	0	CIN1	LSIL	0	0	0
61	>3	1-3	Yes	ASCUS	Non-HPV 16/18	ECC+2	LSIL	Negative	0	CIN1	LSIL	0	0	0
61	1-3	1-3	Yes	ASCUS	Non-HPV 16/18	ECC+2	Negative	Negative	0	Negative	Negative	0	0	0
61	1-3	1-3	Yes	ASCUS	Non-HPV 16/18	ECC+2	Negative	Negative	0	Negative	Negative	0	0	0
61	>3	1-3	Yes	ASCUS	Non-HPV 16/18	ECC+2	Negative	Negative	0	Negative	Negative	0	0	0
61	1-3	1-3	Yes	ASCUS	Non-HPV 16/18	ECC+2	Negative	Negative	0	Negative	Negative	0	0	0
61	1-3	1-3	Yes	ASCUS	Non-HPV 16/18	ECC+2	Negative	Negative	0	Negative	Negative	0	0	0
61	>3	1-3	Yes	ASCUS	Non-HPV 16/18	ECC+2	Negative	Negative	0	Negative	Negative	0	0	0
61	>3	1-3	Yes	LSIL	Non-HPV 16/18	ECC+2	LSIL	Negative	0	CIN1	LSIL	0	0	0
61	1-3	1-3	Yes	NILM	Non-HPV 16/18	ECC+2	Negative	Negative	0	Negative	Negative	0	0	0
61	1-3	1-3	Yes	NILM	Non-HPV 16/18	ECC+2	Negative	Negative	0	Negative	Negative	0	0	0
61	1-3	1-3	Yes	NILM	Non-HPV 16/18	ECC+2	Negative	Negative	0	Negative	Negative	0	0	0
61	>3	1-3	Yes	NILM	Non-HPV 16/18	ECC+2	Negative	Negative	0	Negative	Negative	0	0	0
61	1-3	1-3	Yes	NILM	Non-HPV 16/18	ECC+2	Negative	Negative	0	Negative	Negative	0	0	0
61	1-3	1-3	Yes	NILM	Non-HPV 16/18	ECC+2	Negative	Negative	0	Negative	Negative	0	0	0
61	>3	1-3	Yes	NILM	Non-HPV 16/18	ECC+2	Negative	Negative	0	Negative	Negative	0	0	0
61	1-3	1-3	Yes	NILM	Non-HPV 16/18	ECC+2	Negative	Negative	0	Negative	Negative	0	0	0
61	1-3	1-3	Yes	NILM	Non-HPV 16/18	ECC+2	Negative	Negative	0	Negative	Negative	0	0	0
62	>3	>3	Yes	ASCUS	Non-HPV 16/18	ECC+2	LSIL	LSIL	0	CIN1	LSIL	0	0	0
62	>3	1-3	Yes	ASCUS	Non-HPV 16/18	ECC+2	LSIL	Negative	0	CIN1	LSIL	0	0	0
62	>3	1-3	Yes	ASCUS	Non-HPV 16/18	ECC+2	LSIL	Negative	0	CIN1	LSIL	0	0	0
62	>3	>3	Yes	ASCUS	Non-HPV 16/18	ECC+2	Negative	Negative	0	Negative	Negative	0	0	0
62	>3	1-3	Yes	ASCUS	Non-HPV 16/18	ECC+2	Negative	Negative	0	Negative	Negative	0	0	0
62	1-3	1-3	Yes	LSIL	Non-HPV 16/18	ECC+2	LSIL	Negative	0	CIN1	LSIL	0	0	0
62	>3	1-3	Yes	LSIL	Non-HPV 16/18	ECC+2	Negative	Negative	0	Negative	Negative	0	0	0
62	1-3	1-3	Yes	NILM	Non-HPV 16/18	ECC+2	LSIL	LSIL	0	CIN1	LSIL	0	0	0
62	1-3	1-3	Yes	NILM	Non-HPV 16/18	ECC+2	Negative	LSIL	0	CIN1	LSIL	0	0	0
62	1-3	1-3	Yes	NILM	Non-HPV 16/18	ECC+2	Negative	LSIL	0	CIN1	LSIL	0	0	0
62	1-3	1-3	Yes	NILM	Non-HPV 16/18	ECC+2	LSIL	Negative	0	CIN1	LSIL	0	0	0
62	>3	1-3	Yes	NILM	Non-HPV 16/18	ECC+2	Negative	Negative	0	Negative	Negative	0	0	0
62	>3	1-3	Yes	NILM	Non-HPV 16/18	ECC+2	Negative	Negative	0	Negative	Negative	0	0	0
62	1-3	1-3	Yes	NILM	Non-HPV 16/18	ECC+2	Negative	Negative	0	Negative	Negative	0	0	0
62	1-3	1-3	Yes	NILM	Non-HPV 16/18	ECC+2	Negative	Negative	0	Negative	Negative	0	0	0
62	>3	1-3	Yes	NILM	Non-HPV 16/18	ECC+2	Negative	Negative	0	Negative	Negative	0	0	0
62	1-3	1-3	Yes	NILM	Non-HPV 16/18	ECC+2	Negative	Negative	0	Negative	Negative	0	0	0
62	>3	>3	Yes	NILM	Non-HPV 16/18	ECC+2	Negative	Negative	0	Negative	Negative	0	0	0
63	1-3	1-3	Yes	ASCUS	Non-HPV 16/18	ECC+2	LSIL	Negative	0	CIN1	LSIL	0	0	0
63	>3	1-3	Yes	LSIL	Non-HPV 16/18	ECC+2	LSIL	Negative	0	CIN1	LSIL	0	0	0
63	1-3	1-3	Yes	NILM	Non-HPV 16/18	ECC+2	LSIL	Negative	0	CIN1	LSIL	0	0	0
63	1-3	1-3	Yes	NILM	Non-HPV 16/18	ECC+2	LSIL	Negative	0	CIN1	LSIL	0	0	0
63	>3	1-3	Yes	NILM	Non-HPV 16/18	ECC+2	Negative	Negative	0	Negative	Negative	0	0	0
63	1-3	1-3	Yes	NILM	Non-HPV 16/18	ECC+2	Negative	Negative	0	Negative	Negative	0	0	0
63	1-3	1-3	Yes	NILM	Non-HPV 16/18	ECC+2	Negative	Negative	0	Negative	Negative	0	0	0
63	>3	1-3	Yes	NILM	Non-HPV 16/18	ECC+2	Negative	Negative	0	Negative	Negative	0	0	0
64	>3	1-3	Yes	ASCUS	Non-HPV 16/18	ECC+2	LSIL	Negative	0	CIN1	LSIL	0	0	0
64	1-3	1-3	Yes	ASCUS	Non-HPV 16/18	ECC+2	LSIL	Negative	0	CIN1	LSIL	0	0	0
64	1-3	1-3	Yes	ASCUS	Non-HPV 16/18	ECC+2	LSIL	Negative	0	CIN1	LSIL	0	0	0
64	>3	1-3	Yes	ASCUS	Non-HPV 16/18	ECC+2	Negative	Negative	0	Negative	Negative	0	0	0
64	1-3	1-3	Yes	ASCUS	Non-HPV 16/18	ECC+2	Negative	Negative	0	Negative	Negative	0	0	0
64	1-3	1-3	Yes	ASCUS	Non-HPV 16/18	ECC+2	Negative	Negative	0	Negative	Negative	0	0	0
64	>3	>3	Yes	NILM	Non-HPV 16/18	ECC+2	LSIL	Negative	0	CIN1	LSIL	0	0	0
64	1-3	1-3	Yes	NILM	Non-HPV 16/18	ECC+2	LSIL	Negative	0	CIN1	LSIL	0	0	0
64	>3	1-3	Yes	NILM	Non-HPV 16/18	ECC+2	LSIL	Negative	0	CIN1	LSIL	0	0	0
64	1-3	1-3	Yes	NILM	Non-HPV 16/18	ECC+2	LSIL	Negative	0	CIN1	LSIL	0	0	0
64	1-3	1-3	Yes	NILM	Non-HPV 16/18	ECC+2	Negative	Negative	0	Negative	Negative	0	0	0
64	>3	1-3	Yes	NILM	Non-HPV 16/18	ECC+2	Negative	Negative	0	Negative	Negative	0	0	0
65	1-3	1-3	Yes	ASCUS	Non-HPV 16/18	ECC+2	LSIL	HSIL+	1	CIN1	HSIL+	0	0	0
65	>3	1-3	Yes	ASCUS	Non-HPV 16/18	ECC+2	LSIL	Negative	0	CIN1	LSIL	0	0	0
65	>3	1-3	Yes	ASCUS	Non-HPV 16/18	ECC+2	Negative	Negative	0	Negative	Negative	0	0	0
65	1-3	1-3	Yes	ASCUS	Non-HPV 16/18	ECC+2	Negative	Negative	0	Negative	Negative	0	0	0
65	1-3	1-3	Yes	ASCUS	Non-HPV 16/18	ECC+2	Negative	Negative	0	Negative	Negative	0	0	0
65	1-3	1-3	Yes	ASCUS	Non-HPV 16/18	ECC+2	Negative	Negative	0	Negative	Negative	0	0	0
65	>3	1-3	Yes	LSIL	Non-HPV 16/18	ECC+2	LSIL	Negative	0	CIN1	LSIL	0	0	0
65	>3	1-3	Yes	LSIL	Non-HPV 16/18	ECC+2	LSIL	Negative	0	CIN1	LSIL	0	0	0
65	1-3	1-3	Yes	NILM	Non-HPV 16/18	ECC+2	LSIL	Negative	0	CIN1	LSIL	0	0	0
65	1-3	1-3	Yes	NILM	Non-HPV 16/18	ECC+2	LSIL	Negative	0	CIN1	LSIL	0	0	0
65	1-3	1-3	Yes	NILM	Non-HPV 16/18	ECC+2	LSIL	Negative	0	CIN1	LSIL	0	0	0
65	1-3	1-3	Yes	NILM	Non-HPV 16/18	ECC+2	Negative	Negative	0	Negative	Negative	0	0	0
65	1-3	1-3	Yes	NILM	Non-HPV 16/18	ECC+2	Negative	Negative	0	Negative	Negative	0	0	0
66	1-3	1-3	Yes	ASCUS	Non-HPV 16/18	ECC+2	Negative	LSIL	0	CIN1	LSIL	0	0	0
66	1-3	1-3	Yes	ASCUS	Non-HPV 16/18	ECC+2	LSIL	Negative	0	CIN1	LSIL	0	0	0
66	1-3	1-3	Yes	ASCUS	Non-HPV 16/18	ECC+2	LSIL	Negative	0	CIN1	LSIL	0	0	0
66	1-3	1-3	Yes	ASCUS	Non-HPV 16/18	ECC+2	Negative	Negative	0	Negative	Negative	0	0	0
66	>3	1-3	Yes	LSIL	Non-HPV 16/18	ECC+2	LSIL	Negative	0	CIN1	LSIL	0	0	0
66	1-3	1-3	Yes	NILM	Non-HPV 16/18	ECC+2	LSIL	LSIL	0	CIN1	LSIL	0	0	0
66	1-3	1-3	Yes	NILM	Non-HPV 16/18	ECC+2	HSIL+	Negative	0	CIN3+	HSIL+	1	0	1
66	>3	1-3	Yes	NILM	Non-HPV 16/18	ECC+2	LSIL	Negative	0	CIN1	LSIL	0	0	0
66	>3	>3	Yes	NILM	Non-HPV 16/18	ECC+2	LSIL	Negative	0	CIN1	LSIL	0	0	0
66	>3	1-3	Yes	NILM	Non-HPV 16/18	ECC+2	LSIL	Negative	0	CIN1	LSIL	0	0	0
66	1-3	1-3	Yes	NILM	Non-HPV 16/18	ECC+2	Negative	Negative	0	Negative	Negative	0	0	0
66	1-3	1-3	Yes	NILM	Non-HPV 16/18	ECC+2	Negative	Negative	0	Negative	Negative	0	0	0
66	1-3	1-3	Yes	NILM	Non-HPV 16/18	ECC+2	Negative	Negative	0	Negative	Negative	0	0	0
67	1-3	1-3	Yes	ASCUS	Non-HPV 16/18	ECC+2	Negative	LSIL	0	CIN1	LSIL	0	0	0
67	>3	1-3	Yes	ASCUS	Non-HPV 16/18	ECC+2	LSIL	Negative	0	CIN1	LSIL	0	0	0
67	1-3	1-3	Yes	ASCUS	Non-HPV 16/18	ECC+2	Negative	Negative	0	Negative	Negative	0	0	0
67	1-3	1-3	Yes	ASCUS	Non-HPV 16/18	ECC+2	Negative	Negative	0	Negative	Negative	0	0	0
67	1-3	1-3	Yes	ASCUS	Non-HPV 16/18	ECC+2	Negative	Negative	0	Negative	Negative	0	0	0
67	>3	1-3	Yes	ASCUS	Non-HPV 16/18	ECC+2	Negative	Negative	0	Negative	Negative	0	0	0
67	1-3	1-3	Yes	LSIL	Non-HPV 16/18	ECC+2	Negative	Negative	0	Negative	Negative	0	0	0
67	>3	1-3	Yes	LSIL	Non-HPV 16/18	ECC+2	Negative	Negative	0	Negative	Negative	0	0	0
67	1-3	1-3	Yes	NILM	Non-HPV 16/18	ECC+2	Negative	Negative	0	Negative	Negative	0	0	0
67	>3	1-3	Yes	NILM	Non-HPV 16/18	ECC+2	Negative	Negative	0	Negative	Negative	0	0	0
67	1-3	1-3	Yes	NILM	Non-HPV 16/18	ECC+2	Negative	Negative	0	Negative	Negative	0	0	0
68	1-3	1-3	Yes	ASCUS	Non-HPV 16/18	ECC+2	Negative	Negative	0	Negative	Negative	0	0	0
68	1-3	1-3	Yes	LSIL	Non-HPV 16/18	ECC+2	Negative	HSIL+	1	CIN3+	HSIL+	1	0	0
68	1-3	1-3	Yes	LSIL	Non-HPV 16/18	ECC+2	Negative	Negative	0	Negative	Negative	0	0	0
68	1-3	1-3	Yes	NILM	Non-HPV 16/18	ECC+2	Negative	Negative	0	Negative	Negative	0	0	0
68	>3	1-3	Yes	NILM	Non-HPV 16/18	ECC+2	Negative	Negative	0	Negative	Negative	0	0	0
69	1-3	1-3	Yes	ASCUS	Non-HPV 16/18	ECC+2	LSIL	Negative	0	CIN1	LSIL	0	0	0
69	1-3	1-3	Yes	ASCUS	Non-HPV 16/18	ECC+2	LSIL	Negative	0	CIN1	LSIL	0	0	0
69	>3	1-3	Yes	NILM	Non-HPV 16/18	ECC+2	LSIL	Negative	0	CIN1	LSIL	0	0	0
69	>3	1-3	Yes	NILM	Non-HPV 16/18	ECC+2	Negative	Negative	0	Negative	Negative	0	0	0
69	1-3	1-3	Yes	NILM	Non-HPV 16/18	ECC+2	Negative	Negative	0	Negative	Negative	0	0	0
70	1-3	1-3	Yes	ASCUS	Non-HPV 16/18	ECC+2	Negative	Negative	0	Negative	Negative	0	0	0
70	1-3	1-3	Yes	LSIL	Non-HPV 16/18	ECC+2	LSIL	Negative	0	CIN1	LSIL	0	0	0
70	1-3	1-3	Yes	NILM	Non-HPV 16/18	ECC+2	Negative	HSIL+	1	CIN2	HSIL+	1	0	0
70	1-3	1-3	Yes	NILM	Non-HPV 16/18	ECC+2	Negative	Negative	0	Negative	Negative	0	0	0
70	1-3	1-3	Yes	NILM	Non-HPV 16/18	ECC+2	Negative	Negative	0	Negative	Negative	0	0	0
71	>3	>3	Yes	LSIL	Non-HPV 16/18	ECC+2	Negative	Negative	0	Negative	Negative	0	0	0
71	>3	1-3	Yes	NILM	Non-HPV 16/18	ECC+2	Negative	Negative	0	Negative	Negative	0	0	0
73	1-3	1-3	Yes	ASCUS	Non-HPV 16/18	ECC+2	Negative	Negative	0	Negative	Negative	0	0	0
74	1-3	1-3	Yes	LSIL	Non-HPV 16/18	ECC+2	Negative	Negative	0	Negative	Negative	0	0	0
74	1-3	1-3	Yes	NILM	Non-HPV 16/18	ECC+2	Negative	Negative	0	Negative	Negative	0	0	0
74	1-3	1-3	Yes	NILM	Non-HPV 16/18	ECC+2	Negative	Negative	0	Negative	Negative	0	0	0
76	>3	1-3	Yes	NILM	Non-HPV 16/18	ECC+2	Negative	Negative	0	Negative	Negative	0	0	0
80	>3	1-3	Yes	NILM	Non-HPV 16/18	ECC+2	Negative	Negative	0	Negative	Negative	0	0	0
55	1-3	1-3	Yes	ASCUS	Non-HPV 16/18	ECC+3	Negative	LSIL	0	CIN1	LSIL	0	0	0
55	1-3	1-3	Yes	ASCUS	Non-HPV 16/18	ECC+3	Negative	LSIL	0	CIN1	LSIL	0	0	0
55	1-3	1-3	Yes	ASCUS	Non-HPV 16/18	ECC+3	LSIL	Negative	0	CIN1	LSIL	0	0	0
55	1-3	1-3	Yes	ASCUS	Non-HPV 16/18	ECC+3	LSIL	Negative	0	CIN1	LSIL	0	0	0
55	>3	1-3	Yes	ASCUS	Non-HPV 16/18	ECC+3	Negative	Negative	0	Negative	Negative	0	0	0
55	1-3	1-3	Yes	ASCUS	Non-HPV 16/18	ECC+3	Negative	Negative	0	Negative	Negative	0	0	0
55	1-3	1-3	Yes	ASCUS	Non-HPV 16/18	ECC+3	Negative	Negative	0	Negative	Negative	0	0	0
55	>3	1-3	No	ASCUS	Non-HPV 16/18	ECC+3	Negative	Negative	0	Negative	Negative	0	0	0
55	1-3	1-3	Yes	ASCUS	Non-HPV 16/18	ECC+3	Negative	Negative	0	Negative	Negative	0	0	0
55	1-3	1-3	Yes	LSIL	Non-HPV 16/18	ECC+3	LSIL	LSIL	0	CIN1	LSIL	0	0	0
55	1-3	1-3	Yes	LSIL	Non-HPV 16/18	ECC+3	LSIL	LSIL	0	CIN1	LSIL	0	0	0
55	1-3	1-3	Yes	LSIL	Non-HPV 16/18	ECC+3	LSIL	Negative	0	CIN1	LSIL	0	0	0
55	1-3	1-3	Yes	LSIL	Non-HPV 16/18	ECC+3	LSIL	Negative	0	CIN1	LSIL	0	0	0
55	>3	>3	Yes	LSIL	Non-HPV 16/18	ECC+3	LSIL	Negative	0	CIN1	LSIL	0	0	0
55	1-3	1-3	Yes	LSIL	Non-HPV 16/18	ECC+3	LSIL	Negative	0	CIN1	LSIL	0	0	0
55	>3	1-3	Yes	LSIL	Non-HPV 16/18	ECC+3	Negative	Negative	0	Negative	Negative	0	0	0
55	>3	1-3	Yes	NILM	Non-HPV 16/18	ECC+3	LSIL	Negative	0	CIN1	LSIL	0	0	0
55	1-3	1-3	Yes	NILM	Non-HPV 16/18	ECC+3	Negative	Negative	0	Negative	Negative	0	0	0
55	>3	1-3	Yes	NILM	Non-HPV 16/18	ECC+3	Negative	Negative	0	Negative	Negative	0	0	0
55	1-3	1-3	Yes	NILM	Non-HPV 16/18	ECC+3	Negative	Negative	0	Negative	Negative	0	0	0
55	>3	1-3	Yes	NILM	Non-HPV 16/18	ECC+3	Negative	Negative	0	Negative	Negative	0	0	0
55	>3	1-3	Yes	NILM	Non-HPV 16/18	ECC+3	Negative	Negative	0	Negative	Negative	0	0	0
56	1-3	1-3	Yes	ASCUS	Non-HPV 16/18	ECC+3	LSIL	LSIL	0	CIN1	LSIL	0	0	0
56	>3	1-3	Yes	ASCUS	Non-HPV 16/18	ECC+3	LSIL	LSIL	0	CIN1	LSIL	0	0	0
56	1-3	1-3	Yes	ASCUS	Non-HPV 16/18	ECC+3	LSIL	Negative	0	CIN1	LSIL	0	0	0
56	>3	1-3	Yes	ASCUS	Non-HPV 16/18	ECC+3	LSIL	Negative	0	CIN1	LSIL	0	0	0
56	>3	1-3	Yes	ASCUS	Non-HPV 16/18	ECC+3	LSIL	Negative	0	CIN1	LSIL	0	0	0
56	1-3	1-3	No	ASCUS	Non-HPV 16/18	ECC+3	Negative	Negative	0	Negative	Negative	0	0	0
56	1-3	1-3	Yes	ASCUS	Non-HPV 16/18	ECC+3	Negative	Negative	0	Negative	Negative	0	0	0
56	>3	>3	Yes	ASCUS	Non-HPV 16/18	ECC+3	Negative	Negative	0	Negative	Negative	0	0	0
56	1-3	1-3	Yes	ASCUS	Non-HPV 16/18	ECC+3	Negative	Negative	0	Negative	Negative	0	0	0
56	1-3	1-3	No	ASCUS	Non-HPV 16/18	ECC+3	Negative	Negative	0	Negative	Negative	0	0	0
56	1-3	1-3	Yes	ASCUS	Non-HPV 16/18	ECC+3	Negative	Negative	0	Negative	Negative	0	0	0
56	1-3	1-3	Yes	ASCUS	Non-HPV 16/18	ECC+3	Negative	Negative	0	Negative	Negative	0	0	0
56	1-3	1-3	Yes	ASCUS	Non-HPV 16/18	ECC+3	Negative	Negative	0	Negative	Negative	0	0	0
56	>3	1-3	Yes	ASCUS	Non-HPV 16/18	ECC+3	Negative	Negative	0	Negative	Negative	0	0	0
56	1-3	1-3	Yes	ASCUS	Non-HPV 16/18	ECC+3	Negative	Negative	0	Negative	Negative	0	0	0
56	1-3	1-3	Yes	ASCUS	Non-HPV 16/18	ECC+3	Negative	Negative	0	Negative	Negative	0	0	0
56	1-3	1-3	Yes	LSIL	Non-HPV 16/18	ECC+3	LSIL	Negative	0	CIN1	LSIL	0	0	0
56	>3	1-3	Yes	LSIL	Non-HPV 16/18	ECC+3	Negative	Negative	0	Negative	Negative	0	0	0
56	1-3	1-3	Yes	LSIL	Non-HPV 16/18	ECC+3	Negative	Negative	0	Negative	Negative	0	0	0
56	1-3	1-3	Yes	NILM	Non-HPV 16/18	ECC+3	Negative	LSIL	0	CIN1	LSIL	0	0	0
56	>3	1-3	Yes	NILM	Non-HPV 16/18	ECC+3	LSIL	Negative	0	CIN1	LSIL	0	0	0
56	1-3	1-3	Yes	NILM	Non-HPV 16/18	ECC+3	LSIL	Negative	0	CIN1	LSIL	0	0	0
56	>3	1-3	Yes	NILM	Non-HPV 16/18	ECC+3	LSIL	Negative	0	CIN1	LSIL	0	0	0
56	>3	1-3	Yes	NILM	Non-HPV 16/18	ECC+3	LSIL	Negative	0	CIN1	LSIL	0	0	0
56	1-3	1-3	Yes	NILM	Non-HPV 16/18	ECC+3	Negative	Negative	0	Negative	Negative	0	0	0
56	1-3	1-3	Yes	NILM	Non-HPV 16/18	ECC+3	Negative	Negative	0	Negative	Negative	0	0	0
56	>3	>3	Yes	NILM	Non-HPV 16/18	ECC+3	Negative	Negative	0	Negative	Negative	0	0	0
57	>3	1-3	Yes	ASCUS	Non-HPV 16/18	ECC+3	LSIL	LSIL	0	CIN1	LSIL	0	0	0
57	1-3	1-3	Yes	ASCUS	Non-HPV 16/18	ECC+3	LSIL	LSIL	0	CIN1	LSIL	0	0	0
57	1-3	1-3	Yes	ASCUS	Non-HPV 16/18	ECC+3	LSIL	LSIL	0	CIN1	LSIL	0	0	0
57	>3	1-3	Yes	ASCUS	Non-HPV 16/18	ECC+3	HSIL+	Negative	0	CIN2	HSIL+	1	0	1
57	1-3	1-3	Yes	ASCUS	Non-HPV 16/18	ECC+3	LSIL	Negative	0	CIN1	LSIL	0	0	0
57	1-3	1-3	Yes	ASCUS	Non-HPV 16/18	ECC+3	Negative	Negative	0	Negative	Negative	0	0	0
57	1-3	1-3	Yes	ASCUS	Non-HPV 16/18	ECC+3	Negative	Negative	0	Negative	Negative	0	0	0
57	>3	1-3	Yes	ASCUS	Non-HPV 16/18	ECC+3	Negative	Negative	0	Negative	Negative	0	0	0
57	1-3	1-3	Yes	ASCUS	Non-HPV 16/18	ECC+3	Negative	Negative	0	Negative	Negative	0	0	0
57	>3	1-3	Yes	ASCUS	Non-HPV 16/18	ECC+3	Negative	Negative	0	Negative	Negative	0	0	0
57	1-3	1-3	Yes	ASCUS	Non-HPV 16/18	ECC+3	Negative	Negative	0	Negative	Negative	0	0	0
57	1-3	1-3	Yes	ASCUS	Non-HPV 16/18	ECC+3	Negative	Negative	0	Negative	Negative	0	0	0
57	>3	1-3	Yes	ASCUS	Non-HPV 16/18	ECC+3	Negative	Negative	0	Negative	Negative	0	0	0
57	1-3	1-3	Yes	ASCUS	Non-HPV 16/18	ECC+3	Negative	Negative	0	Negative	Negative	0	0	0
57	1-3	1-3	Yes	LSIL	Non-HPV 16/18	ECC+3	Negative	Negative	0	Negative	Negative	0	0	0
57	1-3	1-3	Yes	NILM	Non-HPV 16/18	ECC+3	HSIL+	Negative	0	CIN2	HSIL+	1	0	1
57	1-3	1-3	Yes	NILM	Non-HPV 16/18	ECC+3	LSIL	Negative	0	CIN1	LSIL	0	0	0
57	1-3	1-3	Yes	NILM	Non-HPV 16/18	ECC+3	LSIL	Negative	0	CIN1	LSIL	0	0	0
57	1-3	1-3	Yes	NILM	Non-HPV 16/18	ECC+3	LSIL	Negative	0	CIN1	LSIL	0	0	0
57	>3	1-3	Yes	NILM	Non-HPV 16/18	ECC+3	Negative	Negative	0	Negative	Negative	0	0	0
57	>3	1-3	Yes	NILM	Non-HPV 16/18	ECC+3	Negative	Negative	0	Negative	Negative	0	0	0
57	>3	1-3	Yes	NILM	Non-HPV 16/18	ECC+3	Negative	Negative	0	Negative	Negative	0	0	0
57	>3	1-3	Yes	NILM	Non-HPV 16/18	ECC+3	Negative	Negative	0	Negative	Negative	0	0	0
58	1-3	1-3	Yes	ASCUS	Non-HPV 16/18	ECC+3	Negative	LSIL	0	CIN1	LSIL	0	0	0
58	>3	1-3	Yes	ASCUS	Non-HPV 16/18	ECC+3	LSIL	Negative	0	CIN1	LSIL	0	0	0
58	1-3	1-3	Yes	ASCUS	Non-HPV 16/18	ECC+3	LSIL	Negative	0	CIN1	LSIL	0	0	0
58	1-3	1-3	Yes	ASCUS	Non-HPV 16/18	ECC+3	Negative	Negative	0	Negative	Negative	0	0	0
58	>3	1-3	Yes	ASCUS	Non-HPV 16/18	ECC+3	Negative	Negative	0	Negative	Negative	0	0	0
58	1-3	1-3	Yes	ASCUS	Non-HPV 16/18	ECC+3	Negative	Negative	0	Negative	Negative	0	0	0
58	>3	1-3	Yes	ASCUS	Non-HPV 16/18	ECC+3	Negative	Negative	0	Negative	Negative	0	0	0
58	>3	>3	Yes	ASCUS	Non-HPV 16/18	ECC+3	Negative	Negative	0	Negative	Negative	0	0	0
58	1-3	1-3	Yes	ASCUS	Non-HPV 16/18	ECC+3	Negative	Negative	0	Negative	Negative	0	0	0
58	>3	1-3	Yes	ASCUS	Non-HPV 16/18	ECC+3	Negative	Negative	0	Negative	Negative	0	0	0
58	1-3	1-3	Yes	LSIL	Non-HPV 16/18	ECC+3	Negative	LSIL	0	CIN1	LSIL	0	0	0
58	1-3	1-3	Yes	LSIL	Non-HPV 16/18	ECC+3	LSIL	Negative	0	CIN1	LSIL	0	0	0
58	1-3	1-3	Yes	NILM	Non-HPV 16/18	ECC+3	LSIL	Negative	0	CIN1	LSIL	0	0	0
58	>3	1-3	Yes	NILM	Non-HPV 16/18	ECC+3	LSIL	Negative	0	CIN1	LSIL	0	0	0
58	1-3	1-3	Yes	NILM	Non-HPV 16/18	ECC+3	LSIL	Negative	0	CIN1	LSIL	0	0	0
58	1-3	1-3	Yes	NILM	Non-HPV 16/18	ECC+3	Negative	Negative	0	Negative	Negative	0	0	0
58	1-3	1-3	Yes	NILM	Non-HPV 16/18	ECC+3	Negative	Negative	0	Negative	Negative	0	0	0
58	1-3	1-3	Yes	NILM	Non-HPV 16/18	ECC+3	Negative	Negative	0	Negative	Negative	0	0	0
58	>3	1-3	Yes	NILM	Non-HPV 16/18	ECC+3	Negative	Negative	0	Negative	Negative	0	0	0
58	1-3	1-3	Yes	NILM	Non-HPV 16/18	ECC+3	Negative	Negative	0	Negative	Negative	0	0	0
58	1-3	1-3	Yes	NILM	Non-HPV 16/18	ECC+3	Negative	Negative	0	Negative	Negative	0	0	0
59	1-3	1-3	Yes	ASCUS	Non-HPV 16/18	ECC+3	HSIL+	Negative	0	CIN3+	HSIL+	1	0	1
59	1-3	1-3	Yes	ASCUS	Non-HPV 16/18	ECC+3	LSIL	Negative	0	CIN1	LSIL	0	0	0
59	>3	1-3	Yes	ASCUS	Non-HPV 16/18	ECC+3	LSIL	Negative	0	CIN1	LSIL	0	0	0
59	1-3	1-3	Yes	ASCUS	Non-HPV 16/18	ECC+3	LSIL	Negative	0	CIN1	LSIL	0	0	0
59	1-3	1-3	Yes	ASCUS	Non-HPV 16/18	ECC+3	Negative	Negative	0	Negative	Negative	0	0	0
59	1-3	1-3	Yes	ASCUS	Non-HPV 16/18	ECC+3	Negative	Negative	0	Negative	Negative	0	0	0
59	>3	1-3	Yes	LSIL	Non-HPV 16/18	ECC+3	LSIL	LSIL	0	CIN1	LSIL	0	0	0
59	1-3	1-3	Yes	LSIL	Non-HPV 16/18	ECC+3	Negative	Negative	0	Negative	Negative	0	0	0
59	1-3	1-3	Yes	LSIL	Non-HPV 16/18	ECC+3	Negative	Negative	0	Negative	Negative	0	0	0
59	1-3	1-3	Yes	LSIL	Non-HPV 16/18	ECC+3	Negative	Negative	0	Negative	Negative	0	0	0
59	1-3	1-3	Yes	LSIL	Non-HPV 16/18	ECC+3	Negative	Negative	0	Negative	Negative	0	0	0
59	1-3	1-3	Yes	LSIL	Non-HPV 16/18	ECC+3	Negative	Negative	0	Negative	Negative	0	0	0
59	1-3	1-3	Yes	NILM	Non-HPV 16/18	ECC+3	LSIL	Negative	0	CIN1	LSIL	0	0	0
59	1-3	1-3	Yes	NILM	Non-HPV 16/18	ECC+3	LSIL	Negative	0	CIN1	LSIL	0	0	0
59	1-3	1-3	Yes	NILM	Non-HPV 16/18	ECC+3	LSIL	Negative	0	CIN1	LSIL	0	0	0
59	1-3	1-3	Yes	NILM	Non-HPV 16/18	ECC+3	Negative	Negative	0	Negative	Negative	0	0	0
59	1-3	1-3	Yes	NILM	Non-HPV 16/18	ECC+3	Negative	Negative	0	Negative	Negative	0	0	0
59	>3	1-3	Yes	NILM	Non-HPV 16/18	ECC+3	Negative	Negative	0	Negative	Negative	0	0	0
59	>3	1-3	Yes	NILM	Non-HPV 16/18	ECC+3	Negative	Negative	0	Negative	Negative	0	0	0
59	1-3	1-3	Yes	NILM	Non-HPV 16/18	ECC+3	Negative	Negative	0	Negative	Negative	0	0	0
59	1-3	1-3	Yes	NILM	Non-HPV 16/18	ECC+3	Negative	Negative	0	Negative	Negative	0	0	0
59	1-3	1-3	Yes	NILM	Non-HPV 16/18	ECC+3	Negative	Negative	0	Negative	Negative	0	0	0
59	1-3	1-3	Yes	NILM	Non-HPV 16/18	ECC+3	Negative	Negative	0	Negative	Negative	0	0	0
59	>3	1-3	Yes	NILM	Non-HPV 16/18	ECC+3	Negative	Negative	0	Negative	Negative	0	0	0
59	1-3	1-3	Yes	NILM	Non-HPV 16/18	ECC+3	Negative	Negative	0	Negative	Negative	0	0	0
60	>3	>3	Yes	ASCUS	Non-HPV 16/18	ECC+3	LSIL	Negative	0	CIN1	LSIL	0	0	0
60	1-3	1-3	Yes	ASCUS	Non-HPV 16/18	ECC+3	LSIL	Negative	0	CIN1	LSIL	0	0	0
60	>3	>3	Yes	ASCUS	Non-HPV 16/18	ECC+3	Negative	Negative	0	Negative	Negative	0	0	0
60	1-3	1-3	Yes	ASCUS	Non-HPV 16/18	ECC+3	Negative	Negative	0	Negative	Negative	0	0	0
60	>3	1-3	Yes	ASCUS	Non-HPV 16/18	ECC+3	Negative	Negative	0	Negative	Negative	0	0	0
60	>3	1-3	Yes	NILM	Non-HPV 16/18	ECC+3	HSIL+	HSIL+	0	CIN3+	HSIL+	1	1	0
60	>3	>3	Yes	NILM	Non-HPV 16/18	ECC+3	LSIL	LSIL	0	CIN1	LSIL	0	0	0
60	1-3	1-3	Yes	NILM	Non-HPV 16/18	ECC+3	LSIL	Negative	0	CIN1	LSIL	0	0	0
60	1-3	1-3	Yes	NILM	Non-HPV 16/18	ECC+3	LSIL	Negative	0	CIN1	LSIL	0	0	0
60	1-3	1-3	Yes	NILM	Non-HPV 16/18	ECC+3	LSIL	Negative	0	CIN1	LSIL	0	0	0
60	1-3	1-3	Yes	NILM	Non-HPV 16/18	ECC+3	LSIL	Negative	0	CIN1	LSIL	0	0	0
60	1-3	1-3	Yes	NILM	Non-HPV 16/18	ECC+3	Negative	Negative	0	Negative	Negative	0	0	0
60	1-3	1-3	Yes	NILM	Non-HPV 16/18	ECC+3	Negative	Negative	0	Negative	Negative	0	0	0
60	>3	1-3	Yes	NILM	Non-HPV 16/18	ECC+3	Negative	Negative	0	Negative	Negative	0	0	0
61	>3	1-3	Yes	ASCUS	Non-HPV 16/18	ECC+3	Negative	LSIL	0	CIN1	LSIL	0	0	0
61	1-3	1-3	Yes	ASCUS	Non-HPV 16/18	ECC+3	LSIL	Negative	0	CIN1	LSIL	0	0	0
61	1-3	1-3	Yes	ASCUS	Non-HPV 16/18	ECC+3	LSIL	Negative	0	CIN1	LSIL	0	0	0
61	>3	1-3	Yes	ASCUS	Non-HPV 16/18	ECC+3	Negative	Negative	0	Negative	Negative	0	0	0
61	1-3	1-3	Yes	NILM	Non-HPV 16/18	ECC+3	Negative	Negative	0	Negative	Negative	0	0	0
62	1-3	1-3	Yes	ASCUS	Non-HPV 16/18	ECC+3	LSIL	Negative	0	CIN1	LSIL	0	0	0
62	>3	1-3	Yes	ASCUS	Non-HPV 16/18	ECC+3	Negative	Negative	0	Negative	Negative	0	0	0
62	1-3	1-3	Yes	ASCUS	Non-HPV 16/18	ECC+3	Negative	Negative	0	Negative	Negative	0	0	0
62	>3	1-3	Yes	ASCUS	Non-HPV 16/18	ECC+3	Negative	Negative	0	Negative	Negative	0	0	0
62	1-3	1-3	Yes	NILM	Non-HPV 16/18	ECC+3	Negative	Negative	0	Negative	Negative	0	0	0
62	>3	>3	Yes	NILM	Non-HPV 16/18	ECC+3	Negative	Negative	0	Negative	Negative	0	0	0
62	1-3	1-3	Yes	NILM	Non-HPV 16/18	ECC+3	Negative	Negative	0	Negative	Negative	0	0	0
62	1-3	1-3	Yes	NILM	Non-HPV 16/18	ECC+3	Negative	Negative	0	Negative	Negative	0	0	0
63	>3	1-3	Yes	ASCUS	Non-HPV 16/18	ECC+3	Negative	Negative	0	Negative	Negative	0	0	0
63	>3	1-3	Yes	ASCUS	Non-HPV 16/18	ECC+3	Negative	Negative	0	Negative	Negative	0	0	0
63	>3	1-3	Yes	ASCUS	Non-HPV 16/18	ECC+3	Negative	Negative	0	Negative	Negative	0	0	0
63	>3	1-3	Yes	ASCUS	Non-HPV 16/18	ECC+3	Negative	Negative	0	Negative	Negative	0	0	0
63	1-3	1-3	Yes	ASCUS	Non-HPV 16/18	ECC+3	Negative	Negative	0	Negative	Negative	0	0	0
63	1-3	1-3	Yes	NILM	Non-HPV 16/18	ECC+3	LSIL	Negative	0	CIN1	LSIL	0	0	0
63	>3	>3	Yes	NILM	Non-HPV 16/18	ECC+3	Negative	Negative	0	Negative	Negative	0	0	0
64	1-3	1-3	Yes	ASCUS	Non-HPV 16/18	ECC+3	Negative	LSIL	0	CIN1	LSIL	0	0	0
64	1-3	1-3	Yes	ASCUS	Non-HPV 16/18	ECC+3	Negative	Negative	0	Negative	Negative	0	0	0
64	1-3	1-3	Yes	ASCUS	Non-HPV 16/18	ECC+3	Negative	Negative	0	Negative	Negative	0	0	0
64	>3	1-3	Yes	LSIL	Non-HPV 16/18	ECC+3	LSIL	Negative	0	CIN1	LSIL	0	0	0
64	1-3	1-3	Yes	LSIL	Non-HPV 16/18	ECC+3	LSIL	Negative	0	CIN1	LSIL	0	0	0
64	1-3	1-3	Yes	NILM	Non-HPV 16/18	ECC+3	Negative	Negative	0	Negative	Negative	0	0	0
64	>3	1-3	Yes	NILM	Non-HPV 16/18	ECC+3	Negative	Negative	0	Negative	Negative	0	0	0
64	>3	1-3	Yes	NILM	Non-HPV 16/18	ECC+3	Negative	Negative	0	Negative	Negative	0	0	0
65	>3	1-3	Yes	ASCUS	Non-HPV 16/18	ECC+3	LSIL	LSIL	0	CIN1	LSIL	0	0	0
65	>3	1-3	Yes	ASCUS	Non-HPV 16/18	ECC+3	LSIL	Negative	0	CIN1	LSIL	0	0	0
65	>3	1-3	Yes	ASCUS	Non-HPV 16/18	ECC+3	LSIL	Negative	0	CIN1	LSIL	0	0	0
65	1-3	1-3	Yes	LSIL	Non-HPV 16/18	ECC+3	LSIL	Negative	0	CIN1	LSIL	0	0	0
65	>3	1-3	Yes	NILM	Non-HPV 16/18	ECC+3	LSIL	Negative	0	CIN1	LSIL	0	0	0
66	1-3	1-3	Yes	ASCUS	Non-HPV 16/18	ECC+3	LSIL	Negative	0	CIN1	LSIL	0	0	0
66	1-3	1-3	Yes	NILM	Non-HPV 16/18	ECC+3	LSIL	Negative	0	CIN1	LSIL	0	0	0
66	1-3	1-3	Yes	NILM	Non-HPV 16/18	ECC+3	Negative	Negative	0	Negative	Negative	0	0	0
67	>3	>3	Yes	ASCUS	Non-HPV 16/18	ECC+3	LSIL	Negative	0	CIN1	LSIL	0	0	0
67	1-3	1-3	Yes	LSIL	Non-HPV 16/18	ECC+3	LSIL	Negative	0	CIN1	LSIL	0	0	0
67	>3	1-3	Yes	NILM	Non-HPV 16/18	ECC+3	Negative	Negative	0	Negative	Negative	0	0	0
68	1-3	1-3	Yes	ASCUS	Non-HPV 16/18	ECC+3	LSIL	LSIL	0	CIN1	LSIL	0	0	0
68	1-3	1-3	Yes	LSIL	Non-HPV 16/18	ECC+3	LSIL	Negative	0	CIN1	LSIL	0	0	0
68	1-3	1-3	Yes	LSIL	Non-HPV 16/18	ECC+3	Negative	Negative	0	Negative	Negative	0	0	0
69	1-3	1-3	Yes	ASCUS	Non-HPV 16/18	ECC+3	LSIL	Negative	0	CIN1	LSIL	0	0	0
69	1-3	1-3	Yes	ASCUS	Non-HPV 16/18	ECC+3	LSIL	Negative	0	CIN1	LSIL	0	0	0
69	>3	1-3	Yes	NILM	Non-HPV 16/18	ECC+3	Negative	Negative	0	Negative	Negative	0	0	0
70	1-3	1-3	Yes	NILM	Non-HPV 16/18	ECC+3	LSIL	Negative	0	CIN1	LSIL	0	0	0
72	1-3	1-3	Yes	NILM	Non-HPV 16/18	ECC+3	Negative	Negative	0	Negative	Negative	0	0	0
75	1-3	1-3	Yes	LSIL	Non-HPV 16/18	ECC+3	LSIL	Negative	0	CIN1	LSIL	0	0	0
75	>3	1-3	Yes	NILM	Non-HPV 16/18	ECC+3	Negative	Negative	0	Negative	Negative	0	0	0
76	1-3	1-3	Yes	NILM	Non-HPV 16/18	ECC+3	Negative	Negative	0	Negative	Negative	0	0	0
55	1-3	1-3	Yes	ASCUS	Non-HPV 16/18	ECC+4	LSIL	Negative	0	CIN1	LSIL	0	0	0
55	1-3	1-3	Yes	ASCUS	Non-HPV 16/18	ECC+4	LSIL	Negative	0	CIN1	LSIL	0	0	0
55	>3	1-3	Yes	ASCUS	Non-HPV 16/18	ECC+4	LSIL	Negative	0	CIN1	LSIL	0	0	0
55	1-3	1-3	Yes	ASCUS	Non-HPV 16/18	ECC+4	Negative	Negative	0	Negative	Negative	0	0	0
55	>3	1-3	Yes	ASCUS	Non-HPV 16/18	ECC+4	Negative	Negative	0	Negative	Negative	0	0	0
55	>3	1-3	Yes	ASCUS	Non-HPV 16/18	ECC+4	Negative	Negative	0	Negative	Negative	0	0	0
55	1-3	1-3	Yes	ASCUS	Non-HPV 16/18	ECC+4	Negative	Negative	0	Negative	Negative	0	0	0
55	1-3	1-3	Yes	ASCUS	Non-HPV 16/18	ECC+4	Negative	Negative	0	Negative	Negative	0	0	0
55	1-3	1-3	Yes	ASCUS	Non-HPV 16/18	ECC+4	Negative	Negative	0	Negative	Negative	0	0	0
55	>3	1-3	Yes	LSIL	Non-HPV 16/18	ECC+4	LSIL	Negative	0	CIN1	LSIL	0	0	0
55	>3	>3	No	LSIL	Non-HPV 16/18	ECC+4	Negative	Negative	0	Negative	Negative	0	0	0
55	>3	>3	No	LSIL	Non-HPV 16/18	ECC+4	Negative	Negative	0	Negative	Negative	0	0	0
55	1-3	1-3	Yes	LSIL	Non-HPV 16/18	ECC+4	Negative	Negative	0	Negative	Negative	0	0	0
55	1-3	1-3	Yes	LSIL	Non-HPV 16/18	ECC+4	Negative	Negative	0	Negative	Negative	0	0	0
55	1-3	1-3	Yes	LSIL	Non-HPV 16/18	ECC+4	Negative	Negative	0	Negative	Negative	0	0	0
55	1-3	1-3	Yes	LSIL	Non-HPV 16/18	ECC+4	Negative	Negative	0	Negative	Negative	0	0	0
55	1-3	1-3	Yes	NILM	Non-HPV 16/18	ECC+4	LSIL	Negative	0	CIN1	LSIL	0	0	0
55	1-3	1-3	Yes	NILM	Non-HPV 16/18	ECC+4	LSIL	Negative	0	CIN1	LSIL	0	0	0
55	>3	1-3	Yes	NILM	Non-HPV 16/18	ECC+4	Negative	Negative	0	Negative	Negative	0	0	0
55	1-3	1-3	Yes	NILM	Non-HPV 16/18	ECC+4	Negative	Negative	0	Negative	Negative	0	0	0
55	1-3	1-3	Yes	NILM	Non-HPV 16/18	ECC+4	Negative	Negative	0	Negative	Negative	0	0	0
55	>3	1-3	Yes	NILM	Non-HPV 16/18	ECC+4	Negative	Negative	0	Negative	Negative	0	0	0
55	1-3	1-3	Yes	NILM	Non-HPV 16/18	ECC+4	Negative	Negative	0	Negative	Negative	0	0	0
55	1-3	1-3	Yes	NILM	Non-HPV 16/18	ECC+4	Negative	Negative	0	Negative	Negative	0	0	0
56	>3	1-3	Yes	ASCUS	Non-HPV 16/18	ECC+4	LSIL	Negative	0	CIN1	LSIL	0	0	0
56	1-3	1-3	No	ASCUS	Non-HPV 16/18	ECC+4	LSIL	Negative	0	CIN1	LSIL	0	0	0
56	>3	1-3	Yes	ASCUS	Non-HPV 16/18	ECC+4	LSIL	Negative	0	CIN1	LSIL	0	0	0
56	>3	1-3	Yes	ASCUS	Non-HPV 16/18	ECC+4	LSIL	Negative	0	CIN1	LSIL	0	0	0
56	1-3	1-3	Yes	ASCUS	Non-HPV 16/18	ECC+4	LSIL	Negative	0	CIN1	LSIL	0	0	0
56	1-3	1-3	Yes	ASCUS	Non-HPV 16/18	ECC+4	Negative	Negative	0	Negative	Negative	0	0	0
56	>3	1-3	Yes	ASCUS	Non-HPV 16/18	ECC+4	Negative	Negative	0	Negative	Negative	0	0	0
56	1-3	1-3	Yes	ASCUS	Non-HPV 16/18	ECC+4	Negative	Negative	0	Negative	Negative	0	0	0
56	1-3	1-3	Yes	ASCUS	Non-HPV 16/18	ECC+4	Negative	Negative	0	Negative	Negative	0	0	0
56	1-3	1-3	Yes	ASCUS	Non-HPV 16/18	ECC+4	Negative	Negative	0	Negative	Negative	0	0	0
56	>3	1-3	Yes	ASCUS	Non-HPV 16/18	ECC+4	Negative	Negative	0	Negative	Negative	0	0	0
56	1-3	1-3	Yes	LSIL	Non-HPV 16/18	ECC+4	LSIL	Negative	0	CIN1	LSIL	0	0	0
56	>3	1-3	Yes	LSIL	Non-HPV 16/18	ECC+4	LSIL	Negative	0	CIN1	LSIL	0	0	0
56	>3	1-3	Yes	LSIL	Non-HPV 16/18	ECC+4	LSIL	Negative	0	CIN1	LSIL	0	0	0
56	1-3	1-3	Yes	LSIL	Non-HPV 16/18	ECC+4	LSIL	Negative	0	CIN1	LSIL	0	0	0
56	>3	1-3	Yes	LSIL	Non-HPV 16/18	ECC+4	LSIL	Negative	0	CIN1	LSIL	0	0	0
56	1-3	1-3	Yes	LSIL	Non-HPV 16/18	ECC+4	LSIL	Negative	0	CIN1	LSIL	0	0	0
56	1-3	1-3	Yes	LSIL	Non-HPV 16/18	ECC+4	LSIL	Negative	0	CIN1	LSIL	0	0	0
56	1-3	1-3	Yes	LSIL	Non-HPV 16/18	ECC+4	Negative	Negative	0	Negative	Negative	0	0	0
56	1-3	1-3	Yes	LSIL	Non-HPV 16/18	ECC+4	Negative	Negative	0	Negative	Negative	0	0	0
56	>3	1-3	Yes	NILM	Non-HPV 16/18	ECC+4	LSIL	Negative	0	CIN1	LSIL	0	0	0
56	>3	1-3	Yes	NILM	Non-HPV 16/18	ECC+4	LSIL	Negative	0	CIN1	LSIL	0	0	0
56	>3	1-3	Yes	NILM	Non-HPV 16/18	ECC+4	LSIL	Negative	0	CIN1	LSIL	0	0	0
56	1-3	1-3	Yes	NILM	Non-HPV 16/18	ECC+4	Negative	Negative	0	Negative	Negative	0	0	0
56	1-3	1-3	Yes	NILM	Non-HPV 16/18	ECC+4	Negative	Negative	0	Negative	Negative	0	0	0
56	0	0	Yes	NILM	Non-HPV 16/18	ECC+4	Negative	Negative	0	Negative	Negative	0	0	0
56	1-3	1-3	Yes	NILM	Non-HPV 16/18	ECC+4	Negative	Negative	0	Negative	Negative	0	0	0
57	1-3	1-3	Yes	ASCUS	Non-HPV 16/18	ECC+4	LSIL	LSIL	0	CIN1	LSIL	0	0	0
57	1-3	1-3	Yes	ASCUS	Non-HPV 16/18	ECC+4	LSIL	Negative	0	CIN1	LSIL	0	0	0
57	1-3	1-3	Yes	ASCUS	Non-HPV 16/18	ECC+4	LSIL	Negative	0	CIN1	LSIL	0	0	0
57	1-3	1-3	Yes	ASCUS	Non-HPV 16/18	ECC+4	LSIL	Negative	0	CIN1	LSIL	0	0	0
57	1-3	1-3	Yes	ASCUS	Non-HPV 16/18	ECC+4	Negative	Negative	0	Negative	Negative	0	0	0
57	1-3	1-3	Yes	ASCUS	Non-HPV 16/18	ECC+4	Negative	Negative	0	Negative	Negative	0	0	0
57	>3	1-3	Yes	ASCUS	Non-HPV 16/18	ECC+4	Negative	Negative	0	Negative	Negative	0	0	0
57	>3	1-3	Yes	ASCUS	Non-HPV 16/18	ECC+4	Negative	Negative	0	Negative	Negative	0	0	0
57	>3	1-3	Yes	ASCUS	Non-HPV 16/18	ECC+4	Negative	Negative	0	Negative	Negative	0	0	0
57	1-3	1-3	Yes	LSIL	Non-HPV 16/18	ECC+4	LSIL	Negative	0	CIN1	LSIL	0	0	0
57	>3	1-3	Yes	LSIL	Non-HPV 16/18	ECC+4	Negative	Negative	0	Negative	Negative	0	0	0
57	1-3	1-3	Yes	LSIL	Non-HPV 16/18	ECC+4	Negative	Negative	0	Negative	Negative	0	0	0
57	1-3	1-3	Yes	NILM	Non-HPV 16/18	ECC+4	LSIL	Negative	0	CIN1	LSIL	0	0	0
57	1-3	1-3	Yes	NILM	Non-HPV 16/18	ECC+4	Negative	Negative	0	Negative	Negative	0	0	0
57	1-3	1-3	Yes	NILM	Non-HPV 16/18	ECC+4	Negative	Negative	0	Negative	Negative	0	0	0
57	1-3	1-3	Yes	NILM	Non-HPV 16/18	ECC+4	Negative	Negative	0	Negative	Negative	0	0	0
57	1-3	1-3	Yes	NILM	Non-HPV 16/18	ECC+4	Negative	Negative	0	Negative	Negative	0	0	0
57	1-3	1-3	Yes	NILM	Non-HPV 16/18	ECC+4	Negative	Negative	0	Negative	Negative	0	0	0
57	>3	1-3	Yes	NILM	Non-HPV 16/18	ECC+4	Negative	Negative	0	Negative	Negative	0	0	0
57	1-3	1-3	Yes	NILM	Non-HPV 16/18	ECC+4	Negative	Negative	0	Negative	Negative	0	0	0
58	>3	1-3	Yes	ASCUS	Non-HPV 16/18	ECC+4	LSIL	LSIL	0	CIN1	LSIL	0	0	0
58	1-3	1-3	Yes	ASCUS	Non-HPV 16/18	ECC+4	Negative	LSIL	0	CIN1	LSIL	0	0	0
58	>3	1-3	Yes	ASCUS	Non-HPV 16/18	ECC+4	LSIL	Negative	0	CIN1	LSIL	0	0	0
58	1-3	1-3	Yes	ASCUS	Non-HPV 16/18	ECC+4	LSIL	Negative	0	CIN1	LSIL	0	0	0
58	>3	1-3	Yes	ASCUS	Non-HPV 16/18	ECC+4	LSIL	Negative	0	CIN1	LSIL	0	0	0
58	>3	1-3	Yes	ASCUS	Non-HPV 16/18	ECC+4	LSIL	Negative	0	CIN1	LSIL	0	0	0
58	1-3	1-3	Yes	ASCUS	Non-HPV 16/18	ECC+4	LSIL	Negative	0	CIN1	LSIL	0	0	0
58	>3	1-3	Yes	ASCUS	Non-HPV 16/18	ECC+4	LSIL	Negative	0	CIN1	LSIL	0	0	0
58	1-3	1-3	Yes	ASCUS	Non-HPV 16/18	ECC+4	Negative	Negative	0	Negative	Negative	0	0	0
58	>3	1-3	Yes	ASCUS	Non-HPV 16/18	ECC+4	Negative	Negative	0	Negative	Negative	0	0	0
58	1-3	1-3	Yes	ASCUS	Non-HPV 16/18	ECC+4	Negative	Negative	0	Negative	Negative	0	0	0
58	1-3	1-3	Yes	ASCUS	Non-HPV 16/18	ECC+4	Negative	Negative	0	Negative	Negative	0	0	0
58	1-3	1-3	Yes	ASCUS	Non-HPV 16/18	ECC+4	Negative	Negative	0	Negative	Negative	0	0	0
58	1-3	1-3	Yes	LSIL	Non-HPV 16/18	ECC+4	Negative	Negative	0	Negative	Negative	0	0	0
58	1-3	1-3	Yes	LSIL	Non-HPV 16/18	ECC+4	Negative	Negative	0	Negative	Negative	0	0	0
58	>3	1-3	Yes	LSIL	Non-HPV 16/18	ECC+4	Negative	Negative	0	Negative	Negative	0	0	0
58	1-3	1-3	Yes	NILM	Non-HPV 16/18	ECC+4	LSIL	Negative	0	CIN1	LSIL	0	0	0
58	1-3	1-3	Yes	NILM	Non-HPV 16/18	ECC+4	LSIL	Negative	0	CIN1	LSIL	0	0	0
58	1-3	1-3	Yes	NILM	Non-HPV 16/18	ECC+4	LSIL	Negative	0	CIN1	LSIL	0	0	0
58	1-3	1-3	Yes	NILM	Non-HPV 16/18	ECC+4	Negative	Negative	0	Negative	Negative	0	0	0
58	>3	>3	Yes	NILM	Non-HPV 16/18	ECC+4	Negative	Negative	0	Negative	Negative	0	0	0
59	1-3	1-3	Yes	ASCUS	Non-HPV 16/18	ECC+4	LSIL	LSIL	0	CIN1	LSIL	0	0	0
59	1-3	1-3	Yes	ASCUS	Non-HPV 16/18	ECC+4	HSIL+	Negative	0	CIN2	HSIL+	1	0	1
59	>3	1-3	Yes	ASCUS	Non-HPV 16/18	ECC+4	LSIL	Negative	0	CIN1	LSIL	0	0	0
59	>3	1-3	Yes	ASCUS	Non-HPV 16/18	ECC+4	LSIL	Negative	0	CIN1	LSIL	0	0	0
59	1-3	1-3	Yes	ASCUS	Non-HPV 16/18	ECC+4	LSIL	Negative	0	CIN1	LSIL	0	0	0
59	1-3	1-3	Yes	ASCUS	Non-HPV 16/18	ECC+4	Negative	Negative	0	Negative	Negative	0	0	0
59	>3	1-3	Yes	ASCUS	Non-HPV 16/18	ECC+4	Negative	Negative	0	Negative	Negative	0	0	0
59	1-3	1-3	Yes	ASCUS	Non-HPV 16/18	ECC+4	Negative	Negative	0	Negative	Negative	0	0	0
59	>3	1-3	Yes	ASCUS	Non-HPV 16/18	ECC+4	Negative	Negative	0	Negative	Negative	0	0	0
59	1-3	1-3	Yes	ASCUS	Non-HPV 16/18	ECC+4	Negative	Negative	0	Negative	Negative	0	0	0
59	>3	1-3	Yes	ASCUS	Non-HPV 16/18	ECC+4	Negative	Negative	0	Negative	Negative	0	0	0
59	>3	1-3	Yes	ASCUS	Non-HPV 16/18	ECC+4	Negative	Negative	0	Negative	Negative	0	0	0
59	1-3	1-3	Yes	ASCUS	Non-HPV 16/18	ECC+4	Negative	Negative	0	Negative	Negative	0	0	0
59	>3	1-3	Yes	LSIL	Non-HPV 16/18	ECC+4	LSIL	Negative	0	CIN1	LSIL	0	0	0
59	1-3	1-3	Yes	LSIL	Non-HPV 16/18	ECC+4	LSIL	Negative	0	CIN1	LSIL	0	0	0
59	>3	1-3	Yes	LSIL	Non-HPV 16/18	ECC+4	Negative	Negative	0	Negative	Negative	0	0	0
59	>3	1-3	Yes	LSIL	Non-HPV 16/18	ECC+4	Negative	Negative	0	Negative	Negative	0	0	0
59	>3	1-3	Yes	LSIL	Non-HPV 16/18	ECC+4	Negative	Negative	0	Negative	Negative	0	0	0
59	1-3	1-3	Yes	LSIL	Non-HPV 16/18	ECC+4	Negative	Negative	0	Negative	Negative	0	0	0
59	>3	1-3	Yes	NILM	Non-HPV 16/18	ECC+4	Negative	HSIL+	1	CIN2	HSIL+	1	0	0
59	>3	1-3	Yes	NILM	Non-HPV 16/18	ECC+4	HSIL+	Negative	0	CIN2	HSIL+	1	0	1
59	1-3	1-3	Yes	NILM	Non-HPV 16/18	ECC+4	LSIL	Negative	0	CIN1	LSIL	0	0	0
59	1-3	1-3	Yes	NILM	Non-HPV 16/18	ECC+4	LSIL	Negative	0	CIN1	LSIL	0	0	0
59	>3	1-3	Yes	NILM	Non-HPV 16/18	ECC+4	LSIL	Negative	0	CIN1	LSIL	0	0	0
59	1-3	1-3	Yes	NILM	Non-HPV 16/18	ECC+4	LSIL	Negative	0	CIN1	LSIL	0	0	0
59	>3	1-3	Yes	NILM	Non-HPV 16/18	ECC+4	LSIL	Negative	0	CIN1	LSIL	0	0	0
59	1-3	1-3	Yes	NILM	Non-HPV 16/18	ECC+4	Negative	Negative	0	Negative	Negative	0	0	0
59	1-3	1-3	Yes	NILM	Non-HPV 16/18	ECC+4	Negative	Negative	0	Negative	Negative	0	0	0
59	1-3	1-3	Yes	NILM	Non-HPV 16/18	ECC+4	Negative	Negative	0	Negative	Negative	0	0	0
59	>3	1-3	Yes	NILM	Non-HPV 16/18	ECC+4	Negative	Negative	0	Negative	Negative	0	0	0
60	>3	1-3	Yes	ASCUS	Non-HPV 16/18	ECC+4	LSIL	LSIL	0	CIN1	LSIL	0	0	0
60	1-3	1-3	Yes	ASCUS	Non-HPV 16/18	ECC+4	LSIL	Negative	0	CIN1	LSIL	0	0	0
60	>3	1-3	Yes	ASCUS	Non-HPV 16/18	ECC+4	LSIL	Negative	0	CIN1	LSIL	0	0	0
60	>3	1-3	Yes	ASCUS	Non-HPV 16/18	ECC+4	LSIL	Negative	0	CIN1	LSIL	0	0	0
60	>3	1-3	Yes	ASCUS	Non-HPV 16/18	ECC+4	LSIL	Negative	0	CIN1	LSIL	0	0	0
60	>3	1-3	Yes	ASCUS	Non-HPV 16/18	ECC+4	Negative	Negative	0	Negative	Negative	0	0	0
60	>3	1-3	Yes	ASCUS	Non-HPV 16/18	ECC+4	Negative	Negative	0	Negative	Negative	0	0	0
60	1-3	1-3	Yes	LSIL	Non-HPV 16/18	ECC+4	LSIL	Negative	0	CIN1	LSIL	0	0	0
60	1-3	1-3	Yes	LSIL	Non-HPV 16/18	ECC+4	LSIL	Negative	0	CIN1	LSIL	0	0	0
60	>3	1-3	Yes	LSIL	Non-HPV 16/18	ECC+4	Negative	Negative	0	Negative	Negative	0	0	0
60	1-3	1-3	Yes	NILM	Non-HPV 16/18	ECC+4	LSIL	Negative	0	CIN1	LSIL	0	0	0
60	1-3	1-3	Yes	NILM	Non-HPV 16/18	ECC+4	Negative	Negative	0	Negative	Negative	0	0	0
60	>3	1-3	Yes	NILM	Non-HPV 16/18	ECC+4	Negative	Negative	0	Negative	Negative	0	0	0
60	1-3	1-3	Yes	NILM	Non-HPV 16/18	ECC+4	Negative	Negative	0	Negative	Negative	0	0	0
60	1-3	1-3	Yes	NILM	Non-HPV 16/18	ECC+4	Negative	Negative	0	Negative	Negative	0	0	0
61	1-3	1-3	Yes	ASCUS	Non-HPV 16/18	ECC+4	LSIL	Negative	0	CIN1	LSIL	0	0	0
61	>3	>3	Yes	ASCUS	Non-HPV 16/18	ECC+4	LSIL	Negative	0	CIN1	LSIL	0	0	0
61	1-3	1-3	Yes	ASCUS	Non-HPV 16/18	ECC+4	LSIL	Negative	0	CIN1	LSIL	0	0	0
61	>3	1-3	Yes	LSIL	Non-HPV 16/18	ECC+4	Negative	Negative	0	Negative	Negative	0	0	0
61	>3	1-3	Yes	NILM	Non-HPV 16/18	ECC+4	LSIL	Negative	0	CIN1	LSIL	0	0	0
61	>3	1-3	Yes	NILM	Non-HPV 16/18	ECC+4	Negative	Negative	0	Negative	Negative	0	0	0
61	1-3	1-3	Yes	NILM	Non-HPV 16/18	ECC+4	Negative	Negative	0	Negative	Negative	0	0	0
61	1-3	1-3	Yes	NILM	Non-HPV 16/18	ECC+4	Negative	Negative	0	Negative	Negative	0	0	0
61	1-3	1-3	Yes	NILM	Non-HPV 16/18	ECC+4	Negative	Negative	0	Negative	Negative	0	0	0
62	1-3	1-3	Yes	ASCUS	Non-HPV 16/18	ECC+4	LSIL	Negative	0	CIN1	LSIL	0	0	0
62	1-3	1-3	Yes	ASCUS	Non-HPV 16/18	ECC+4	LSIL	Negative	0	CIN1	LSIL	0	0	0
62	>3	1-3	Yes	ASCUS	Non-HPV 16/18	ECC+4	LSIL	Negative	0	CIN1	LSIL	0	0	0
62	1-3	1-3	Yes	ASCUS	Non-HPV 16/18	ECC+4	Negative	Negative	0	Negative	Negative	0	0	0
62	1-3	1-3	Yes	ASCUS	Non-HPV 16/18	ECC+4	Negative	Negative	0	Negative	Negative	0	0	0
62	1-3	1-3	Yes	LSIL	Non-HPV 16/18	ECC+4	Negative	HSIL+	1	CIN2	HSIL+	1	0	0
62	1-3	1-3	Yes	LSIL	Non-HPV 16/18	ECC+4	LSIL	Negative	0	CIN1	LSIL	0	0	0
62	>3	1-3	Yes	NILM	Non-HPV 16/18	ECC+4	LSIL	Negative	0	CIN1	LSIL	0	0	0
63	1-3	1-3	Yes	ASCUS	Non-HPV 16/18	ECC+4	Negative	Negative	0	Negative	Negative	0	0	0
63	1-3	1-3	Yes	LSIL	Non-HPV 16/18	ECC+4	LSIL	LSIL	0	CIN1	LSIL	0	0	0
63	1-3	1-3	Yes	LSIL	Non-HPV 16/18	ECC+4	Negative	Negative	0	Negative	Negative	0	0	0
63	1-3	1-3	Yes	NILM	Non-HPV 16/18	ECC+4	Negative	HSIL+	1	CIN2	HSIL+	1	0	0
63	>3	1-3	Yes	NILM	Non-HPV 16/18	ECC+4	Negative	Negative	0	Negative	Negative	0	0	0
64	1-3	1-3	Yes	ASCUS	Non-HPV 16/18	ECC+4	HSIL+	Negative	0	CIN2	HSIL+	1	0	1
64	1-3	1-3	Yes	ASCUS	Non-HPV 16/18	ECC+4	Negative	Negative	0	Negative	Negative	0	0	0
64	1-3	1-3	Yes	LSIL	Non-HPV 16/18	ECC+4	Negative	Negative	0	Negative	Negative	0	0	0
64	1-3	1-3	Yes	NILM	Non-HPV 16/18	ECC+4	Negative	Negative	0	Negative	Negative	0	0	0
65	>3	1-3	Yes	ASCUS	Non-HPV 16/18	ECC+4	LSIL	Negative	0	CIN1	LSIL	0	0	0
65	>3	1-3	Yes	ASCUS	Non-HPV 16/18	ECC+4	LSIL	Negative	0	CIN1	LSIL	0	0	0
65	>3	1-3	Yes	NILM	Non-HPV 16/18	ECC+4	LSIL	Negative	0	CIN1	LSIL	0	0	0
65	1-3	1-3	Yes	NILM	Non-HPV 16/18	ECC+4	Negative	Negative	0	Negative	Negative	0	0	0
66	1-3	1-3	Yes	NILM	Non-HPV 16/18	ECC+4	Negative	Negative	0	Negative	Negative	0	0	0
67	1-3	1-3	Yes	ASCUS	Non-HPV 16/18	ECC+4	HSIL+	Negative	0	CIN2	HSIL+	1	0	1
67	1-3	1-3	Yes	NILM	Non-HPV 16/18	ECC+4	Negative	Negative	0	Negative	Negative	0	0	0
68	1-3	1-3	Yes	ASCUS	Non-HPV 16/18	ECC+4	LSIL	Negative	0	CIN1	LSIL	0	0	0
68	>3	>3	Yes	NILM	Non-HPV 16/18	ECC+4	LSIL	Negative	0	CIN1	LSIL	0	0	0
68	>3	1-3	Yes	NILM	Non-HPV 16/18	ECC+4	Negative	Negative	0	Negative	Negative	0	0	0
69	1-3	1-3	Yes	ASCUS	Non-HPV 16/18	ECC+4	LSIL	LSIL	0	CIN1	LSIL	0	0	0
70	>3	1-3	Yes	ASCUS	Non-HPV 16/18	ECC+4	LSIL	Negative	0	CIN1	LSIL	0	0	0
70	1-3	1-3	Yes	ASCUS	Non-HPV 16/18	ECC+4	Negative	Negative	0	Negative	Negative	0	0	0
71	>3	1-3	Yes	LSIL	Non-HPV 16/18	ECC+4	LSIL	Negative	0	CIN1	LSIL	0	0	0
72	>3	1-3	Yes	ASCUS	Non-HPV 16/18	ECC+4	LSIL	Negative	0	CIN1	LSIL	0	0	0
76	>3	>3	Yes	ASCUS	Non-HPV 16/18	ECC+4	Negative	Negative	0	Negative	Negative	0	0	0
76	>3	1-3	Yes	ASCUS	Non-HPV 16/18	ECC+4	Negative	Negative	0	Negative	Negative	0	0	0
